# Supplementary material
Source: Research Square preprint supplement (doi:10.21203/rs.3.rs-8765905/v1)
Supplement: Supplementary file 1 [file 5e8d8c2fdf8c379d8e6aeb08.xlsx]

## Sheet: Sheet1
province	name	id	year	lnDc	y	SCORE	中介	中介		工具	gdp	con	gov	income	tool3	shangzhi	zhihou	graduation	population	wenlvyule	light	jiehe	zhongjie	standard	scale	distance	medscale	scaledum	scaledum1
浙江	德清	1	2020	4.80468	0.76	0.84	15	2.70805	0.0270805	33.121	544	0.271	0.144	0.000357	3.56771	0.652364	84.5418	9.15	0.0316	0.0356	0.00255174	0.0204139	15	0.0322581	54.8568	3.56771	58.5081	0	0
浙江	安吉	2	2020	4.72588	1.39	0.29	78	4.35671	0.0435671	59.4643	487	0.402	0.177	0.000404	3.9828	0.705867	63.2815	9.1	0.0236	0.0279	0.00157943	0.044224	78	0.167742	58.6409	3.9828	58.5081	1	1
浙江	桐乡	3	2020	4.67161	0.29	0.54	176	5.17048	0.0517048	55.2268	1002.98	0.418	0.104	0.000393	3.86085	0.41666	62.4243	9	0.0604	0.0463	0.00484143	0.27112	176	0.378495	102.975	3.86085	58.5081	1	1
浙江	余姚	4	2020	4.66861	0.46	0.18	138	4.92725	0.0492725	100.578	1220.72	0.326	0.106	0.000211	3.59019	0.444134	87.0502	9.08	0.0414	0.0457	0.00296996	0.124738	138	0.296774	125.403	3.59019	58.5081	1	1
浙江	武义	5	2020	4.65453	0.51	-0.49	61	4.11087	0.0411087	158.152	271.33	0.363	0.208	0.000438	4.99525	0.372389	69.1047	8.82	0.0163	0.0156	0.000814845	0.0122227	61	0.131183	46.2462	4.99525	58.5081	0	0
浙江	萧山	6	2020	4.65444	-0.26	-0.06	305	5.72031	0.0572031	16.2788	1828.5	0.394	0.151	0.00041	1.97345	0.150108	65.2864	9.98	0.5097	0.132	0.00482806	0.52143	305	0.655914	225.887	1.97345	58.5081	1	1
浙江	慈溪	7	2020	4.64631	0.2	-0.3	370	5.9135	0.059135	108.046	2008.3	0.32	0.108	0.000256	3.70637	0.268465	71.354	9.15	0.0514	0.0608	0.00388614	0.470222	370	0.795699	182.949	3.70637	58.5081	1	1
浙江	苍南	8	2020	4.64458	0.13	0.36	149	5.00395	0.0500395	308.649	363.09	0.673	0.216	0.000407	5.70906	0.0888487	87.2242	8.08	0.0354	0.0222	0.0023626	0.0850537	149	0.32043	84.3962	5.70906	58.5081	1	1
浙江	嘉善	9	2020	4.61383	0.46	-0.2	19	2.94444	0.0294444	95.6033	655.77	0.36	0.154	0.000337	4.37782	0.506238	55.6391	9.15	0.0319	0.0381	0.00460298	0.0230149	19	0.0408602	64.816	4.37782	58.5081	1	1
浙江	东阳	10	2020	4.60817	0.34	-0.11	58	4.06044	0.0406044	111.162	638.16	0.444	0.156	0.000267	4.66694	0.345628	71.4192	9.3	0.0489	0.1332	0.00191669	0.030667	58	0.124731	108.795	4.66694	58.5081	1	1
浙江	平阳	11	2020	4.59865	0.5	0.37	88	4.47734	0.0447734	293.973	534.51	0.436	0.172	0.000249	5.64659	0.29205	78.2055	8.3	0.0407	0.0245	0.00253756	0.0659767	88	0.189247	86.3088	5.64659	58.5081	1	1
浙江	浦江	12	2020	4.58833	0.61	-0.19	37	3.61092	0.0361092	95.8801	234.46	0.415	0.17	0.000362	4.46716	0.550007	66.3162	8.95	0.0145	0.0127	0.00171879	0.0206254	37	0.0795699	46.0726	4.46716	58.5081	0	0
浙江	温岭	13	2020	4.58731	-0.03	0.15	465	6.14204	0.0614204	244.297	1136.87	0.589	0.095	0.000423	5.19982	0.230739	68.0147	8.49	0.0432	0.0621	0.00384895	0.357952	465	1	141.62	5.19982	58.5081	1	1
浙江	诸暨	14	2020	4.58405	0.47	0.31	160	5.07517	0.0507517	65.4905	1362.36	0.339	0.086	0.000235	4.09105	0.413638	81.6131	9.54	0.0537	0.0378	0.0017307	0.0536518	160	0.344086	121.807	4.09105	58.5081	1	1
浙江	缙云	15	2020	4.57759	0.61	0.53	40	3.68888	0.0368888	181.276	243.44	0.433	0.27	0.000245	5.17166	0.422967	53.6124	8.91	0.0131	0.0123	0.000623021	0.00560719	40	0.0860215	40.5318	5.17166	58.5081	0	0
浙江	仙居	16	2020	4.5712	0.82	0.4	31	3.43399	0.0343399	169.499	260.5	0.407	0.205	0.000264	5.01564	0.45704	75.7319	8.99	0.013	0.0101	0.00050679	0.00405432	31	0.0666667	43.1888	5.01564	58.5081	0	0
浙江	永嘉	17	2020	4.55892	0.47	0.74	135	4.90527	0.0490527	239.426	461.89	0.537	0.24	0.000264	5.42571	0.54243	67.3158	8.58	0.0249	0.0146	0.000903587	0.026204	135	0.290323	86.9624	5.42571	58.5081	1	1
浙江	天台	18	2020	4.55713	0.57	-0.02	232	5.44674	0.0544674	151.793	301.7	0.431	0.177	0.000322	4.72511	0.587388	82.9439	9.09	0.0143	0.0174	0.00100408	0.0622527	232	0.498925	47.4711	4.72511	58.5081	0	0
浙江	临海	19	2020	4.54807	0.13	-0.2	94	4.54329	0.0454329	185.93	738.48	0.348	0.143	0.000399	4.93566	0.240425	58.7384	8.73	0.0326	0.0465	0.00165341	0.0496022	94	0.202151	111.415	4.93566	58.5081	1	1
浙江	海曙	20	2020	4.54372	-0.15	-0.43	29	3.3673	0.033673	142.678	1201.18	0.654	0.085	0.000405	3.7819	0.154747	64.7074	10.27	0.1195	0.0562	0.00311265	0.0280138	29	0.0623656	104.129	3.7819	58.5081	1	1
浙江	镇海	21	2020	4.54127	-0.34	-0.5	11	2.3979	0.023979	144.368	1030.06	0.148	0.085	0.000403	3.78571	0.0317122	74.4072	10.19	0.0531	0.0321	0.00557398	0.0222959	11	0.0236559	53.183	3.78571	58.5081	0	0
浙江	海盐	22	2020	4.53346	0.05	0.93	30	3.4012	0.034012	80.9568	544.51	0.291	0	0.000248	3.92808	0.334766	69.4802	9.12	0.0257	0.0181	0.00243106	0.0243106	30	0.0645161	45.6775	3.92808	58.5081	0	0
江苏	泰兴	23	2020	4.53152	0.36	0.07	23	3.13549	0.0313549	209.038	1127.47	0.244	0.096	0.0002	4.64614	0.492805	59.5573	9.28	0.04	0.0221	0.00281316	0	23	0.0494624	99.4445	4.64614	58.5081	1	1
江苏	东海	24	2020	4.51284	-0.17	-0.29	34	3.52636	0.0352636	489.931	553.81	0.44	0.141	0.000192	5.62063	0.284931	55.7474	9.49	0.0616	0.0263	0.00125209	0	34	0.0731183	104.736	5.62063	58.5081	1	1
江苏	睢宁	25	2020	4.51097	-0.19	0.37	451	6.11147	0.0611147	453.581	619.34	0.682	0.163	0.000197	5.20008	0.279943	67.3365	8.44	0.0372	0.013	0.00120501	0.102426	451	0.969892	108.855	5.20008	58.5081	1	1
江苏	沭阳	26	2020	4.50325	-0.1	-0.23	327	5.78996	0.0578996	442.666	536.92	0.408	0.171	0.000295	5.43048	0.127807	64.2975	8.89	0.0813	0.0191	0.00123543	0.0370629	327	0.703226	167.498	5.43048	58.5081	1	1
江苏	丹阳	27	2020	4.49892	-0.15	-0.02	29	3.3673	0.033673	197.669	1145.36	0.264	0.083	0.000342	4.28834	0.287877	67.9446	9.56	0.0484	0.0349	0.00328894	0	29	0.0623656	98.89	4.28834	58.5081	1	1
浙江	桐庐	28	2020	4.49758	0.73	0.22	25	3.21888	0.0321888	70.9366	376.3	0.365	0.15	0.000308	3.90652	0.427143	53.8622	9.23	0.0287	0.022	0.000925997	0.00370399	25	0.0537634	45.3106	3.90652	58.5081	0	0
浙江	建德	29	2020	4.48931	0.51	0.52	12	2.48491	0.0248491	123.746	391.9	0.291	0.151	0.000371	4.3345	0.342459	63.0067	9.14	0.0256	0.01	0.000756218	0.00302487	12	0.0258065	44.2709	4.3345	58.5081	0	0
浙江	南浔	30	2020	4.48852	0.19	-0.57	35	3.55535	0.0355535	67.624	468	0.246	0.118	0.000339	4.22789	0.306662	62.8809	8.38	0.02	0.0136	0.0035319	0.0388509	35	0.0752688	54.2889	4.22789	58.5081	0	0
浙江	椒江	31	2020	4.48684	-0.26	0.18	47	3.85015	0.0385015	218.277	691.9	0.42	0.08	0.000202	4.99681	0.0694632	64.5962	9.68	0.0798	0.0539	0.00495749	0.114022	47	0.101075	82.6074	4.99681	58.5081	1	1
江苏	新沂	32	2020	4.46522	-0.1	-0.05	35	3.55535	0.0355535	483.828	692.22	0.414	0.139	0.000195	5.50559	0.348468	71.2823	8.6	0.0364	0.0148	0.00149806	0.0134825	35	0.0752688	96.9922	5.50559	58.5081	1	1
江苏	泗阳	33	2020	4.46141	0.04	-0.43	23	3.13549	0.0313549	404.476	528.53	0.289	0	0.000414	5.2191	0.34993	77.9102	9.12	0.0241	0.0096	0.00116329	0	23	0.0494624	82.9562	5.2191	58.5081	1	1
浙江	北仑	34	2020	4.45922	-0.08	-0.16	5	1.60944	0.0160944	169.366	2020.49	0.185	0.139	0.000344	3.81562	0.113982	50.4521	9.93	0.0471	0.0455	0.00519599	0.020784	5	0.0107527	82.9448	3.81562	58.5081	1	1
浙江	嵊州	35	2020	4.45876	0.23	-0.02	12	2.48491	0.0248491	104.019	601.27	0	0	0.000281	4.28434	0.282393	54.929	9.33	0.0232	0.0212	0.0011093	0.00554652	12	0.0258065	67.5226	4.28434	58.5081	1	1
浙江	柯城	36	2020	4.45841	-0.05	-0.1	22	3.09104	0.0309104	194.165	236.48	0.877	0.24	0.000219	4.72934	0.32777	65.1794	10.25	0.0619	0.0371	0.00190861	0.00954305	22	0.0473118	52.8847	4.72934	58.5081	0	0
安徽	天长	37	2020	4.4533	0.02	-0.19	5	1.60944	0.0160944	285.465	549.28	0.324	0.127	0.000381	4.8759	0.290897	53.5858	9.5	0.0219	0.0133	0.000893109	0	5	0.0107527	60.378	4.8759	58.5081	1	1
浙江	富阳	38	2020	4.45179	0	-0.31	17	2.83321	0.0283321	32.2025	812.1	0.458	0.126	0.000331	3.14995	0.172076	58.4564	9.72	0.0744	0.0607	0.00189503	0.0132652	17	0.0365591	83.2017	3.14995	58.5081	1	1
浙江	黄岩	39	2020	4.44746	0.12	-0.22	76	4.33073	0.0433073	211.358	557.38	0.444	0.106	0.000358	5.05679	0.344993	67.258	8.96	0.0226	0.0215	0.0016001	0.0608039	76	0.163441	70.7453	5.05679	58.5081	1	1
浙江	临安	40	2020	4.445	0.34	1	124	4.82028	0.0482028	41.3038	600.4	0.318	0.151	0.00017	3.02909	0.401558	68.8905	9.75	0.0435	0.0241	0.00071001	0.0191703	124	0.266667	63.4555	3.02909	58.5081	1	1
安徽	泾	41	2020	4.44077	0.11	-0.19	13	2.56495	0.0256495	172.409	130.21	0.532	0.291	0.000232	5.25313	0.473791	85.6471	8.51	0.0126	0.0066	0.000210472	0	13	0.027957	27.5837	5.25313	58.5081	0	0
江苏	铜山	42	2020	4.4403	-0.06	-0.23	8	2.07944	0.0207944	515.699	1181.54	0.35	0.109	0.000376	4.97742	0.239799	78.4095	9.04	0.0547	0.0197	0.00200957	0.00803828	8	0.0172043	123.776	4.97742	58.5081	1	1
浙江	玉环	43	2020	4.4332	-0.19	0.73	23	3.13549	0.0313549	260.923	632.56	0.335	0.108	0.000257	5.35644	0.166665	67.4857	8.24	0.0174	0.0253	0.00361607	0.0216964	23	0.0494624	64.4014	5.35644	58.5081	1	1
江苏	句容	44	2020	4.42974	0.22	0.1	0	0	0	206.671	675.47	0.226	0.117	0.000232	3.59959	0.459768	80.592	9.65	0.0399	0.0227	0.00217626	0	0	0	63.9266	3.59959	58.5081	1	1
江苏	通州	45	2020	4.42891	-0.12	0.03	0	0	0	215.613	1462.51	0.279	0.094	0.000362	5.58912	0.242333	63.5331	11.66	0.5553	0.2919	0.00350672	0.0946815	0	0	184.03	5.58912	58.5081	1	1
浙江	宁海	46	2020	4.42568	0.67	0.46	17	2.83321	0.0283321	166.292	722.55	0.375	0.12	0.000284	4.46418	0.356794	61.2708	9.1	0.0298	0.0422	0.00155797	0.00778987	17	0.0365591	69.5958	4.46418	58.5081	1	1
浙江	江山	47	2020	4.42485	0.98	0.77	12	2.48491	0.0248491	227.229	312.64	0.477	0.231	0.000232	4.84381	0.498577	62.1147	8.8	0.0197	0.0126	0.000417335	0.000834671	12	0.0258065	49.4412	4.84381	58.5081	0	0
江苏	兴化	48	2020	4.42149	0.51	-0.58	60	4.09434	0.0409434	291.686	900.92	0.266	0.127	0.000232	4.5975	0.552475	78.2893	8.17	0.0326	0.0211	0.00142573	0	60	0.129032	112.82	4.5975	58.5081	1	1
浙江	滨江	49	2020	4.41607	-0.44	-0.24	0	0	0	10.8167	536.92	0.408	0.171	0.00038	1.4395	0.0228228	71.4558	12.65	0.5385	0.0609	0.00617324	0	0	0	50.3859	1.4395	58.5081	0	0
浙江	上虞	50	2020	4.41425	0.19	-0.12	11	2.3979	0.023979	75.2396	1043.82	0.433	0.116	0.00022	3.4264	0.320032	62.7638	9.31	0.0541	0.0301	0.0026838	0.0214704	11	0.0236559	83.9747	3.4264	58.5081	1	1
浙江	云和	51	2020	4.41231	0.17	-0.11	14	2.63906	0.0263906	247.164	86.99	0.426	0.379	0.000232	5.42595	0.216612	61.0965	8.68	0.0039	0.0023	0.00039928	0.00079856	14	0.0301075	12.9216	5.42595	58.5081	0	0
江苏	宿城	52	2020	4.39999	-0.38	-0.01	201	5.3033	0.053033	446.04	403.22	0.656	0	0.000293	5.29998	0.0729211	75.6482	9.17	0.0687	0.0224	0.00263611	0	201	0.432258	84.5147	5.29998	58.5081	1	1
浙江	金东	53	2020	4.37789	-0.18	0	18	2.89037	0.0289037	139.517	259.27	0.918	0.126	0.000219	4.81438	0.0735665	66.5556	9.27	0.0402	0.0134	0.00318649	0.0254919	18	0.0387097	50.6935	4.81438	58.5081	0	0
江苏	沛	54	2020	4.37273	-0.26	-0.05	14	2.63906	0.0263906	581.414	805.01	0.531	0.15	0.000378	5.09488	0.130696	55.3372	8.8	0.0355	0.0129	0.00173714	0.0086857	14	0.0301075	103.834	5.09488	58.5081	1	1
浙江	长兴	55	2020	4.36666	0.29	-0.27	6	1.79176	0.0179176	84.6463	702	0.424	0.128	0.000266	4.49176	0.38922	77.2428	9.09	0.0345	0.0285	0.00217973	0.00217973	6	0.0129032	67.3776	4.49176	58.5081	1	1
浙江	婺城	56	2020	4.36552	-0.06	-0.32	9	2.19722	0.0219722	142.804	654.48	0.696	0.219	0.000232	4.80775	0.185124	58.3222	10.23	0.1161	0.0459	0.00166522	0.0083261	9	0.0193548	95.7055	4.80775	58.5081	1	1
江苏	丹徒	57	2020	4.36526	-0.09	0.15	7	1.94591	0.0194591	215.128	414.03	0.152	0.077	0.000232	4.01315	0.196027	61.3976	9.85	0.0164	0.0107	0.00333273	0	7	0.0150538	34.7264	4.01315	58.5081	0	0
江苏	赣榆	58	2020	4.35504	0.13	0.97	16	2.77259	0.0277259	513.654	631.58	0.262	0.128	0.00027	5.68651	0.319396	60.8925	9.8	0.0373	0.01	0.00184479	0	16	0.0344086	100.384	5.68651	58.5081	1	1
江苏	东台	59	2020	4.35079	0.64	-0.44	10	2.30259	0.0230259	286.923	893.35	0.275	0.133	0.000232	4.63651	0.464413	58.4791	8.65	0.0312	0.0118	0.000899059	0	10	0.0215054	88.841	4.63651	58.5081	1	1
江苏	虎丘	60	2020	4.33925	-0.5	-0.42	0	0	0	118.849	1446.32	0.372	0	0.000232	5.22756	0.0261108	80.5708	10.88	0.1747	0.0339	0.00470147	0	0	0	83.2499	5.22756	58.5081	1	1
江苏	玄武	61	2020	4.33507	-0.42	0.02	0	0	0	233.944	1108.66	0	0	0.000238	0.0898078	0.0334588	66.5842	12.93	0.1656	0.0543	0.0062	0	0	0	53.7825	0.0898078	58.5081	0	0
江苏	如东	62	2020	4.33244	-0.01	0.27	6	1.79176	0.0179176	246.546	1155.11	0.352	0.117	0.00021	5.08357	0.304557	63.2548	8.66	0.0329	0.011	0.0014004	0.00420119	6	0.0129032	88.0006	5.08357	58.5081	1	1
浙江	磐安	63	2020	4.33218	0.55	-0.31	0	0	0	140.428	120.7	0.303	0.33	0.000232	4.88012	0.462013	72.7364	8.8	0.0091	0.0051	0.000374915	0	0	0	17.7161	4.88012	58.5081	0	0
江苏	海州	64	2020	4.33021	-0.42	-0.05	3	1.09861	0.0109861	486.359	653.14	0.621	0	0.00018	4.5986	0.0316816	65.422	10.96	0.0133	0.0063	0.00269795	0	3	0.00645161	23.4029	4.5986	58.5081	0	0
江苏	灌云	65	2020	4.324	-0.16	-0.15	28	3.3322	0.033322	451.774	381.64	0.199	0.183	0.000283	5.46969	0.323042	61.858	8.28	0.018	0.0061	0.00115816	0	28	0.0602151	72.5047	5.46969	58.5081	1	1
浙江	三门	66	2020	4.31855	0.01	-0.08	24	3.17805	0.0317805	178.55	273.39	0.38	0.197	0.000195	4.66176	0.256574	61.6391	8.09	0.0109	0.0134	0.00124776	0.00374327	24	0.0516129	37.9469	4.66176	58.5081	0	0
江苏	丰	67	2020	4.31709	-0.35	0.27	10	2.30259	0.0230259	593.283	486.53	0.534	0.17	0.000276	4.87226	0.224056	57.7048	8.71	0.0187	0.0055	0.00105495	0.00316486	10	0.0215054	93.52	4.87226	58.5081	1	1
江苏	启东	68	2020	4.31589	-0.04	-0.5	11	2.3979	0.023979	220.239	1223.1	0.338	0.097	0.000154	5.44678	0.305502	66.7901	9.02	0.0401	0.0142	0.00243185	0.0121592	11	0.0236559	96.7313	5.44678	58.5081	1	1
安徽	相山	69	2020	4.31549	-0.44	0.03	0	0	0	516.954	536.92	0.408	0.171	0.000183	5.39913	0.0604595	65.8936	10.66	0.0351	0.0208	0.00391042	0	0	0	54.8934	5.39913	58.5081	0	0
安徽	桐城	70	2020	4.3112	-0.2	-0.14	5	1.60944	0.0160944	315.636	392.83	0.337	0.138	0.000203	4.61016	0.299272	73.8937	8.83	0.0452	0.0152	0.000570052	0	5	0.0107527	59.3629	4.61016	58.5081	1	1
浙江	泰顺	71	2020	4.31013	0.7	-0.54	0	0	0	306.111	121.99	0.451	0.401	0.000232	5.67271	0.34286	70.4675	7.91	0.0067	0.0062	0.000543424	0	0	0	26.598	5.67271	58.5081	0	0
浙江	上城	72	2020	4.31013	-0.35	-0.2	0	0	0	6.08276	536.92	0.408	0.171	0.000155	0.615403	0.0599953	70.8195	11.55	0.0796	0.0357	0.00627778	0	0	0	35.7657	0.615403	58.5081	0	0
安徽	金安	73	2020	4.30838	-0.29	0.11	4	1.38629	0.0138629	382.394	536.92	0.408	0.171	0.000232	4.13346	0.0808383	68.2927	9.21	0.044	0.023	0.00122029	0	4	0.00860215	82.9236	4.13346	58.5081	1	1
江苏	浦口	74	2020	4.30703	-0.06	-0.02	0	0	0	244.381	1385.93	0.441	0	0.000261	2.70674	0.401351	82.0251	11.57	0.3491	0.0648	0.004167	0	0	0	117.16	2.70674	58.5081	1	1
安徽	肥西	75	2020	4.30609	-0.42	-0.36	0	0	0	331.485	870.16	0.246	0.106	0.000232	3.21019	0.161692	78.1452	9.93	0.1176	0.0348	0.00130583	0	0	0	96.7508	3.21019	58.5081	1	1
江苏	姑苏	76	2020	4.3038	-0.38	-0.04	0	0	0	124.234	819.9	1.011	0	0.000255	5.30951	0.0738362	54.9901	11.4	0.1764	0.0698	0.0063	0	0	0	92.4083	5.30951	58.5081	1	1
浙江	龙泉	77	2020	4.3	0.53	0.16	19	2.94444	0.0294444	264.715	147.16	0.485	0.344	0.000232	5.37701	0.342625	70.4507	8.63	0.0081	0.0076	0.000208111	0.000624332	19	0.0408602	24.8866	5.37701	58.5081	0	0
江苏	贾汪	78	2020	4.29946	0.3	-0.09	3	1.09861	0.0109861	525.476	359.2	0.391	0.124	0.000232	5.29077	0.471727	56.835	8.63	0.0152	0.0067	0.00287074	0.00574149	3	0.00645161	45.3555	5.29077	58.5081	0	0
江苏	六合	79	2020	4.29319	-0.18	0.17	0	0	0	258.961	1676.01	0	0.051	0.000183	3.38436	0.198337	65.1101	9.64	0.096	0.0303	0.00238593	0	0	0	94.6563	3.38436	58.5081	1	1
安徽	青阳	80	2020	4.28662	0.14	0.12	1	0	0	224.964	142.38	0.529	0.155	0.000232	5.08077	0.328639	65.8783	8.33	0.0077	0.0093	0.000403769	0	1	0.00215054	24.8464	5.08077	58.5081	0	0
江苏	江都	81	2020	4.2851	-0.02	-0.17	7	1.94591	0.0194591	244.753	1114.91	0.231	0.105	0.000239	4.24227	0.291222	74.2808	8.91	0.0567	0.0224	0.00202919	0	7	0.0150538	92.6577	4.24227	58.5081	1	1
江苏	仪征	82	2020	4.28469	-0.19	0.26	8	2.07944	0.0207944	238.65	815.05	0.141	0.084	0.000329	3.67062	0.204767	58.3413	9.29	0.0277	0.0198	0.00244723	0	8	0.0172043	53.2571	3.67062	58.5081	0	0
浙江	新昌	83	2020	4.27875	0.51	-0.49	5	1.60944	0.0160944	113.851	461.46	0.36	0.14	0.000235	4.35496	0.526473	65.5655	9.63	0.017	0.0107	0.00106881	0.00213762	5	0.0107527	41.9036	4.35496	58.5081	0	0
浙江	衢江	84	2020	4.27861	0.21	-0.33	12	2.48491	0.0248491	185.914	209.35	0.359	0.294	0.000232	4.75297	0.240337	67.6415	8.14	0.0161	0.009	0.000753771	0.00226131	12	0.0258065	37.392	4.75297	58.5081	0	0
江苏	云龙	85	2020	4.27347	-0.5	0.23	0	0	0	518.591	400.95	0	0	0.000223	5.0552	0.0556885	78.344	11.4	0.0467	0.0168	0.00597328	0	0	0	47.1566	5.0552	58.5081	0	0
浙江	遂昌	86	2020	4.27109	0.89	-0.58	1	0	0	206.63	130.81	0.483	0.326	0.000232	5.11914	0.520912	60.1343	8.55	0.0099	0.0056	0.00021445	0.00021445	1	0.00215054	19.4385	5.11914	58.5081	0	0
浙江	江干	87	2020	4.2697	-0.46	-0.08	17	2.83321	0.0283321	6.40312	536.92	0.408	0.171	0.000145	0.17438	0.00999998	60.6682	12.02	0.4385	0.1462	0.000377405	0.00113221	17	0.0365591	148.779	0.17438	58.5081	1	1
安徽	舒城	88	2020	4.26844	-0.11	0.44	5	1.60944	0.0160944	333.242	306.54	0.433	0.208	0.00016	4.00819	0.283037	82.8849	8.79	0.0466	0.0167	0.00054036	0	5	0.0107527	69.725	4.00819	58.5081	1	1
安徽	霍山	89	2020	4.26338	0.28	0.26	1	0	0	385.332	166.26	0.48	0.198	0.000192	4.61067	0.165189	51.032	9.03	0.0213	0.0083	0.000223587	0	1	0.00215054	28.6197	4.61067	58.5081	0	0
安徽	宣州	90	2020	4.26268	0.32	0.11	0	0	0	151.45	536.92	0.408	0.171	0.000208	5.33561	0.463575	50.5477	8.4	0.0273	0.0216	0.00072693	0	0	0	67.1209	5.33561	58.5081	1	1
浙江	松阳	91	2020	4.26014	0.64	0.25	18	2.89037	0.0289037	208.166	119.49	0.476	0.395	0.00023	5.2406	0.435097	72.5269	8.71	0.008	0.0062	0.000448649	0.000448649	18	0.0387097	20.488	5.2406	58.5081	0	0
浙江	兰溪	92	2020	4.25575	0.4	0.23	5	1.60944	0.0160944	137.201	400.16	0.37	0.19	0.000147	4.67393	0.400332	80.3027	8.66	0.0207	0.0141	0.00127412	0	5	0.0107527	57.4801	4.67393	58.5081	0	0
安徽	砀山	93	2020	4.25405	0.27	0.06	1	0	0	583.46	246.86	0.698	0.204	0.000356	5.49071	0.38874	61.473	9.72	0.0202	0.0076	0.000955742	0	1	0.00215054	76.5564	5.49071	58.5081	1	1
浙江	象山	94	2020	4.25377	0.73	0.45	1	0	0	188.534	563	0.371	0.149	0.000204	4.04457	0.461543	59.1698	8.76	0.0161	0.0291	0.00232833	0	1	0.00215054	56.7665	4.04457	58.5081	0	0
浙江	庆元	95	2020	4.25377	0.36	-0.33	7	1.94591	0.0194591	314.396	78.93	0.579	0.495	0.00016	5.55701	0.41335	68.8601	8.58	0.0047	0.0039	0.000167069	0.000167069	7	0.0150538	14.2551	5.55701	58.5081	0	0
安徽	全椒	96	2020	4.25363	-0.13	-0.17	1	0	0	267.599	281.85	0.493	0.154	0.000232	4.65671	0.163954	73.2511	9.27	0.0267	0.0107	0.00083234	0	1	0.00215054	39.5633	4.65671	58.5081	0	0
江苏	亭湖	97	2020	4.24821	-0.43	0.09	4	1.38629	0.0138629	344.246	561.36	0.42	0	0.000232	4.75444	0.0912817	76.2683	10.19	0.0494	0.0239	0.00285092	0	4	0.00860215	79.8003	4.75444	58.5081	1	1
江苏	泉山	98	2020	4.24707	-0.53	-0.39	0	0	0	518.483	682.84	0.509	0	0.000177	5.01137	0.0282328	57.393	11.5	0.0678	0.0346	0.005867	0	0	0	61.9784	5.01137	58.5081	1	1
安徽	怀宁	99	2020	4.24219	-0.23	0.2	0	0	0	323.006	312.27	0.377	0.129	0.000213	4.91453	0.173571	65.844	8.99	0.038	0.0137	0.00078752	0	0	0	49.6683	4.91453	58.5081	0	0
江苏	邳州	100	2020	4.23657	-0.05	0.34	0	0	0	493.025	1001.26	0.332	0.126	0.00017	5.40843	0.30793	63.9285	8.52	0.0364	0.0137	0.00139147	0	0	0	146.256	5.40843	58.5081	1	1
安徽	谯城	101	2020	4.23483	-0.21	-0.39	1	0	0	574.421	536.92	0.408	0.171	0.000233	5.05622	0.279994	68.1867	8.43	0.0505	0.0305	0.00132145	0	1	0.00215054	153.723	5.05622	58.5081	1	1
安徽	长丰	102	2020	4.2328	-0.12	0.61	0	0	0	373.62	659.4	0.436	0.13	0.000232	4.11506	0.105892	76.0791	8.81	0.0618	0.0197	0.00131596	0	0	0	78.3982	4.11506	58.5081	1	1
安徽	巢湖	103	2020	4.23208	0.07	0.24	0	0	0	262.406	498.25	0.386	0.135	0.000232	4.45111	0.424344	71.7537	9.04	0.0332	0.0194	0.000903614	0	0	0	72.7162	4.45111	58.5081	1	1
江苏	溧水	104	2020	4.22318	0.1	-0.22	0	0	0	185.27	911.51	0.384	0.138	0.000136	3.92842	0.464839	78.164	9.64	0.0303	0.0132	0.00247998	0	0	0	49.1336	3.92842	58.5081	0	0
安徽	阜南	105	2020	4.2223	-0.32	0.06	0	0	0	507.836	289.5	0.635	0.28	0.000232	4.78399	0.215164	66.8744	7.67	0.0333	0.0128	0.00100337	0	0	0	118.36	4.78399	58.5081	1	1
江苏	宿豫	106	2020	4.22215	-0.21	-0.33	13	2.56495	0.0256495	441.257	335.25	0.831	0.18	0.000232	5.33471	0.455906	68.8838	8.97	0.1234	0.0117	0.00187852	0	13	0.027957	58.852	5.33471	58.5081	1	1
江苏	连云	107	2020	4.22024	-0.13	-0.12	0	0	0	501.722	219.11	0.34	0	0.000255	5.62153	0.0739372	82.517	10.25	0.0078	0.0065	0.00392724	0	0	0	20.2514	5.62153	58.5081	0	0
安徽	肥东	108	2020	4.21892	-0.27	0.44	4	1.38629	0.0138629	330.48	703.45	0.385	0.136	0.000139	3.52517	0.137952	88.6791	8.79	0.0637	0.0259	0.00126753	0.00126753	4	0.00860215	88.4792	3.52517	58.5081	1	1
安徽	岳西	109	2020	4.21715	0.37	-0.4	0	0	0	370.308	124.4	0.563	0.347	0.000206	4.97366	0.456802	60.2718	8.38	0.0206	0.0074	9.9408e-05	0	0	0	32.3837	4.97366	58.5081	0	0
江苏	滨海	110	2020	4.21479	-0.18	-0.06	1	0	0	411.486	503.86	0.451	0.181	0.000227	5.18114	0.228891	82.8675	8.29	0.016	0.0079	0.00111431	0	1	0.00215054	82.0084	5.18114	58.5081	1	1
安徽	庐江	111	2020	4.20886	0.05	-0.27	0	0	0	294.659	481.43	0.397	0.171	0.0003	4.34025	0.298846	74.1969	8.34	0.0372	0.0191	0.000745628	0	0	0	88.8238	4.34025	58.5081	1	1
安徽	镜湖	112	2020	4.20723	-0.5	-0.54	0	0	0	205.205	536.92	0.408	0.171	0.000232	5.00359	0.0602365	58.1468	10.94	0.0577	0.0297	0.00386752	0	0	0	47.8658	5.00359	58.5081	0	0
浙江	下城	113	2020	4.19675	-0.39	-0.55	0	0	0	3.16228	536.92	0.408	0.171	0.000279	1.40379	0.0499965	59.5835	12.14	0.1597	0.0665	0.00264715	0	0	0	48.5849	1.40379	58.5081	0	0
安徽	博望	114	2020	4.1954	-0.45	0.27	2	0.693147	0.00693147	188.215	536.92	0.408	0.171	0.00029	5.19763	0.0214268	81.3702	7.82	0.0041	0.0023	0.00142678	0	2	0.00430108	15.8483	5.19763	58.5081	0	0
安徽	当涂	115	2020	4.19524	0.15	0.94	0	0	0	212.174	463.5	0.336	0.113	0.000135	4.99147	0.449028	59.5301	8.42	0.0181	0.0081	0.0016686	0	0	0	44.6991	4.99147	58.5081	0	0
安徽	金寨	116	2020	4.19147	0.41	0.02	1	0	0	434.166	196.95	0.638	0.328	0.000139	4.80252	0.586169	82.4318	8.91	0.0268	0.0107	0.000220618	0	1	0.00215054	49.6501	4.80252	58.5081	0	0
安徽	宿松	117	2020	4.19132	-0.13	0.13	0	0	0	388.021	243.15	0.407	0.237	0.000272	5.35285	0.295109	57.5784	8.95	0.0661	0.0155	0.000264926	0	0	0	61.2586	5.35285	58.5081	1	1
浙江	青田	118	2020	4.19011	0.35	0.38	15	2.70805	0.0270805	239.134	249.13	0.426	0.273	0.000138	5.45572	0.297702	77.4065	8.46	0.0085	0.0066	0.000375122	0.00112536	15	0.0322581	50.9053	5.45572	58.5081	0	0
安徽	太湖	119	2020	4.18874	0.25	-0.27	0	0	0	370.563	198.12	0.498	0.267	0.000262	5.20047	0.442226	61.013	8.4	0.0395	0.0107	0.000206507	0	0	0	43.0465	5.20047	58.5081	0	0
安徽	鸠江	120	2020	4.18829	-0.47	0.14	0	0	0	206.814	536.92	0.408	0.171	0.000233	4.99613	0.0678338	75.7098	9.26	0.0325	0.022	0.00272727	0	0	0	54.0487	4.99613	58.5081	0	0
江苏	宝应	121	2020	4.18738	-0.03	-0.23	0	0	0	336.341	763.04	0.209	0.111	0.000156	4.85039	0.300593	70.8471	8.46	0.0339	0.0117	0.00119405	0	0	0	68.2219	4.85039	58.5081	1	1
安徽	界首	122	2020	4.18723	-0.14	-0.14	0	0	0	561.135	346.46	0.477	0.158	0.000144	4.7421	0.290678	75.0416	8.25	0.0163	0.0067	0.00178909	0	0	0	65.087	4.7421	58.5081	1	1
安徽	颍上	123	2020	4.1822	-0.33	0.47	0	0	0	454.667	415.93	0.464	0.209	0.000212	4.56847	0.232312	54.8169	7.91	0.0339	0.0246	0.0011383	0	0	0	119.883	4.56847	58.5081	1	1
安徽	宁国	124	2020	4.17853	0.6	0.18	0	0	0	118.68	384.64	0.276	0.121	0.000349	5.46175	0.478981	66.0047	8.9	0.0134	0.0146	0.000394575	0	0	0	38.4644	5.46175	58.5081	0	0
浙江	奉化	125	2020	4.17485	0.18	-0.17	1	0	0	140.46	685.77	0.222	0.124	0.000137	4.02086	0.298309	62.1759	9.13	0.0275	0.0364	0.00206567	0.00206567	1	0.00215054	57.7505	4.02086	58.5081	0	0
安徽	临泉	126	2020	4.17285	-0.41	-0.28	0	0	0	556.044	394.62	0.651	0.235	0.000165	4.75476	0.19632	67.2494	7.86	0.0421	0.0369	0.00122275	0	0	0	165.844	4.75476	58.5081	1	1
安徽	颍州	127	2020	4.16883	-0.4	0.63	0	0	0	504.049	536.92	0.408	0.171	0.000233	4.74667	0.0705988	62.0099	9.48	0.041	0.016	0.00322516	0	0	0	82.8527	4.74667	58.5081	1	1
江苏	高邮	128	2020	4.16682	0.28	-0.46	1	0	0	283.986	838.18	0.205	0.099	0.000205	4.45478	0.444156	67.3931	8.56	0.0357	0.0191	0.00109296	0	1	0.00215054	70.9572	4.45478	58.5081	1	1
浙江	文成	129	2020	4.16667	0.12	0.64	2	0.693147	0.00693147	277.305	112.01	0.435	0.456	0.000232	5.60972	0.211901	60.5153	8.12	0.0061	0.0045	0.00054114	0.00054114	2	0.00430108	28.8178	5.60972	58.5081	0	0
江苏	海门	130	2020	4.16636	0.53	-0.39	40	3.68888	0.0368888	200.831	536.92	0.408	0.171	0.000392	5.31806	0.387765	86.7789	9.36	0.0365	0.0138	0.00271309	0.0434094	40	0.0860215	99.1782	5.31806	58.5081	1	1
浙江	岱山	131	2020	4.16309	-0.1	0.55	0	0	0	200.09	384.79	0.198	0.141	0.000232	4.33767	0.180824	88.5727	8.73	0.0062	0.006	0.00284384	0	0	0	20.7982	4.33767	58.5081	0	0
安徽	潜山	132	2020	4.1581	0.25	0.69	4	1.38629	0.0138629	346.919	216.71	0.512	0.229	0.000206	5.03908	0.450961	72.9501	8.4	0.04	0.0179	0.000268902	0	4	0.00860215	44.1224	5.03908	58.5081	0	0
浙江	开化	133	2020	4.15748	0.69	0.2	7	1.94591	0.0194591	210.874	150.5	0.589	0.373	0.000232	4.37443	0.644244	64.7226	8.16	0.0098	0.006	0.000295176	0.000295176	7	0.0150538	25.881	4.37443	58.5081	0	0
江苏	高淳	134	2020	4.15622	0.39	-0.5	0	0	0	166.883	513.13	0.46	0.168	0.000325	4.40526	0.480611	65.1891	8.67	0.0349	0.0098	0.00203921	0	0	0	42.9173	4.40526	58.5081	0	0
江苏	扬中	135	2020	4.15418	-0.27	0.29	0	0	0	218.799	489.59	0.272	0.119	0.000236	4.42078	0.0758326	69.9914	9.81	0.0142	0.0083	0.00436144	0	0	0	31.5462	4.42078	58.5081	0	0
江苏	如皋	136	2020	4.1534	0	-0.05	0	0	0	234.555	1305.22	0.351	0.096	0.000146	4.86409	0.312415	68.9575	8.88	0.0705	0.0219	0.00229175	0	0	0	123.845	4.86409	58.5081	1	1
安徽	太和	137	2020	4.14472	-0.39	0.05	0	0	0	535.86	476.04	0.706	0.157	0.000225	4.78722	0.0862106	87.0764	8.18	0.0384	0.0215	0.0011421	0	0	0	137.998	4.78722	58.5081	1	1
浙江	淳安	138	2020	4.14456	0.45	-0.24	0	0	0	130.633	240.6	0.348	0.319	0.000232	4.08939	0.402543	68.1859	8.75	0.0157	0.014	0.000165008	0	0	0	32.8957	4.08939	58.5081	0	0
浙江	景宁畲族自治	139	2020	4.14234	0.55	0.02	8	2.07944	0.0207944	261.293	74.76	0.512	0.586	0.00024	5.49782	0.274731	68.1859	8.4	0.0041	0.0066	0.000113636	0	8	0.0172043	11.1011	5.49782	58.5081	0	0
浙江	常山	140	2020	4.14027	0.2	-0.05	4	1.38629	0.0138629	221.578	160.15	0.445	0.342	0.000304	4.66047	0.311271	68.1859	8.01	0.01	0.0069	0.000907685	0	4	0.00860215	25.9966	4.66047	58.5081	0	0
浙江	莲都	141	2020	4.13916	0.3	-0.3	9	2.19722	0.0219722	202.805	406.97	0.5	0.337	0.000235	5.27807	0.327373	68.1859	9.76	0.0503	0.0312	0.00110432	0.00110432	9	0.0193548	56.2116	5.27807	58.5081	0	0
江苏	建湖	142	2020	4.13884	-0.02	-0.37	0	0	0	350.892	593.88	0.316	0.154	0.000264	4.90643	0.28167	68.1859	8.94	0.0203	0.0134	0.00175187	0	0	0	60.9346	4.90643	58.5081	1	1
安徽	繁昌	143	2020	4.13884	-0.34	-0.35	1	0	0	208.002	536.92	0.408	0.171	0.000213	4.99191	0.191537	68.1859	8.78	#N/A	0.009	0.00192548	0	1	0.00215054	24.3907	4.99191	58.5081	0	0
江苏	阜宁	144	2020	4.13852	-0.31	0.24	0	0	0	386.626	574.22	0.399	0.159	0.000157	5.07597	0.171335	68.1859	8.49	0.0222	0.0128	0.00121986	0	0	0	79.4036	5.07597	58.5081	1	1
安徽	蒙城	145	2020	4.13629	-0.28	0.97	0	0	0	474.659	391.46	0.542	0.182	0.000157	4.97373	0.305479	68.1859	8.03	0.0246	0.0146	0.00078071	0	0	0	110.164	4.97373	58.5081	1	1
安徽	绩溪	146	2020	4.13597	0.49	-0.34	0	0	0	153.31	88.32	0.341	0.215	0.000152	5.42584	0.495212	68.1859	8.82	0.0068	0.0024	0.000178417	0	0	0	13.8784	5.42584	58.5081	0	0
安徽	濉溪	147	2020	4.13308	-0.37	-0.04	0	0	0	514.65	536.92	0.408	0.171	0.000252	5.37363	0.252604	68.1859	8.18	0.0223	0.012	0.00114235	0	0	0	93.2402	5.37363	58.5081	1	1
江苏	海安	148	2020	4.12955	-0.28	0.41	6	1.79176	0.0179176	250.599	1221.63	0.291	0.105	0.000266	4.75324	0.195187	68.1859	9.23	0.0508	0.0196	0.00205302	0.00205302	6	0.0129032	87.4334	4.75324	58.5081	1	1
安徽	南陵	149	2020	4.12794	0.04	-0.26	0	0	0	187.641	281.41	0.387	0.142	0.000147	5.14002	0.407671	68.1859	8.36	0.0208	0.0158	0.00094218	0	0	0	43.1148	5.14002	58.5081	0	0
安徽	埇桥	150	2020	4.12794	-0.32	0.11	0	0	0	478.206	536.92	0.408	0.171	0.000199	5.24932	0.166014	68.1859	9.14	0.0968	0.0368	0.00130575	0	0	0	165.868	5.24932	58.5081	1	1
江苏	盱眙	151	2020	4.12115	-0.06	-0.32	0	0	0	338.25	435.32	0.379	0.147	0.000156	4.66307	0.353664	68.1859	8.41	0.0184	0.0089	0.000508909	0	0	0	60.7211	4.66307	58.5081	1	1
安徽	来安	152	2020	4.11806	0	-0.01	1	0	0	304.138	326.98	0.343	0.123	0.000144	4.71752	0.251232	68.1859	9.35	0.021	0.0118	0.00120241	0	1	0.00215054	41.6048	4.71752	58.5081	0	0
安徽	灵璧	153	2020	4.11692	-0.33	-0.58	0	0	0	438.415	289.05	0.54	0.206	0.000232	5.17205	0.29788	68.1859	8.89	0.0249	0.0148	0.000495059	0	0	0	97.472	5.17205	58.5081	1	1
安徽	弋江	154	2020	4.11513	-0.46	0.62	0	0	0	204.247	536.92	0.408	0.171	0.000301	5.0376	0.00999998	68.1859	11.32	#N/A	0.0203	0.00363212	0	0	0	42.262	5.0376	58.5081	0	0
江苏	溧阳	155	2020	4.11169	0.64	-0.13	4	1.38629	0.0138629	140.46	1086.36	0.292	0.107	0.000386	4.60952	0.533071	68.1859	9.53	0.0485	0.0217	0.00194801	0	4	0.00860215	78.5092	4.60952	58.5081	1	1
浙江	普陀	156	2020	4.11087	0.14	0	1	0	0	212.608	439.86	0.409	0.139	0.000146	5.17332	0.28379	68.1859	12.32	0.4122	0.1278	0.00307904	0	1	0.00215054	123.98	5.17332	58.5081	1	1
安徽	枞阳	157	2020	4.11005	-0.3	-0.24	0	0	0	282.804	168.24	0.473	0.278	0.000141	4.91694	0.273843	68.1859	7.63	0.0162	0.0051	0.000292727	0	0	0	46.9051	4.91694	58.5081	0	0
安徽	望江	158	2020	4.10907	-0.29	-0.36	0	0	0	333.024	190.83	0.434	0.242	0.000232	5.31071	0.0607246	68.1859	7.89	0.0443	0.0133	0.00042813	0	0	0	46.2367	5.31071	58.5081	0	0
江苏	崇川	159	2020	4.10561	-0.49	0.25	0	0	0	202.25	1482.58	0.452	0	0.000191	5.14801	0.0303858	68.1859	11.72	0.0965	0.0396	0.00566908	0	0	0	78.0564	5.14801	58.5081	1	1
江苏	泗洪	160	2020	4.10512	-0.02	1.54	11	2.3979	0.023979	398.121	525.41	0.299	0.189	0.000185	5.01632	0.323202	68.1859	8.91	0.026	0.0121	0.000567962	0	11	0.0236559	85.874	5.01632	58.5081	1	1
安徽	黟	161	2020	4.1038	0.74	0.01	0	0	0	217.518	45.64	0.468	0.329	0.000174	5.41788	0.455418	68.1859	8.59	0.0033	0.0047	6.84149e-05	0	0	0	7.6211	5.41788	58.5081	0	0
安徽	东至	162	2020	4.1038	0.12	-0.41	1	0	0	302.106	211.4	0.42	0.184	0.000183	5.31682	0.228884	68.1859	8.17	0.0345	0.0101	0.000183748	0	1	0.00215054	39.8414	5.31682	58.5081	0	0
安徽	郎溪	163	2020	4.09751	-0.26	2.66	0	0	0	131.59	183.6	0.344	0.192	0.000189	5.46612	0.139396	68.1859	8.25	0.0103	0.0082	0.000848998	0	0	0	31.1513	5.46612	58.5081	0	0
安徽	黄山	164	2020	4.09618	1.69	-0.14	0	0	0	186.261	536.92	0.408	0.171	0.000267	5.31497	0.698148	68.1859	8.66	0.0073	0.0062	7.95779e-05	0	0	0	14.6942	5.31497	58.5081	0	0
浙江	龙游	165	2020	4.09584	0.17	0.2	4	1.38629	0.0138629	169.027	247.61	0.647	0.266	0.000181	4.77314	0.242374	68.1859	8.57	0.0137	0.0084	0.00122716	0	4	0.00860215	36.0229	4.77314	58.5081	0	0
安徽	贵池	166	2020	4.09251	0.1	0	0	0	0	252.622	536.92	0.408	0.171	0.000194	4.97763	0.374078	68.1859	8.97	0.0384	0.0172	0.000608439	0	0	0	61.5274	4.97763	58.5081	1	1
安徽	迎江	167	2020	4.09101	-0.5	-0.07	0	0	0	295.203	536.92	0.408	0.171	0.000181	5.0595	0.0261108	68.1859	10.71	0.0246	0.0131	0.00351401	0	0	0	25.3694	5.0595	58.5081	0	0
安徽	五河	168	2020	4.08715	-0.15	0.28	0	0	0	382.028	258.57	0.539	0.167	0.000232	4.86262	0.235085	68.1859	7.85	0.0149	0.0081	0.000637938	0	0	0	52.3531	4.86262	58.5081	0	0
江苏	盐都	169	2020	4.08665	0.04	0.44	0	0	0	338.12	606.9	0.38	0.123	0.000232	4.75302	0.457994	68.1859	9.56	0.0592	0.0262	0.00184196	0	0	0	83.2584	4.75302	58.5081	1	1
江苏	淮安	170	2020	4.08631	0.28	-0.21	0	0	0	375.225	616.1	0.378	0.139	0.000197	5.06271	0.306259	68.1859	8.42	0.0229	0.016	0.00131024	0	0	0	78.5272	5.06271	58.5081	1	1
安徽	宜秀	171	2020	4.08092	-0.38	0.2	0	0	0	306.778	536.92	0.408	0.171	0.000152	4.9892	0.0846146	68.1859	9.84	0.0147	0.0054	0.00188254	0	0	0	19.6672	4.9892	58.5081	0	0
安徽	旌德	172	2020	4.07855	0.11	-0.01	0	0	0	154.117	54.92	0.342	0.3	0.000155	5.38705	0.296386	68.1859	8.37	0.0049	0.0027	8.39822e-05	0	0	0	11.2368	5.38705	58.5081	0	0
安徽	裕安	173	2020	4.07771	-0.11	0.04	0	0	0	386.409	536.92	0.408	0.171	0.000132	4.22785	0.292033	68.1859	8.91	0.0501	0.0208	0.000860262	0	0	0	92.3301	4.22785	58.5081	1	1
安徽	寿	174	2020	4.0772	-0.46	-0.38	0	0	0	406.42	222.97	0.612	0.375	0.000168	4.28143	0.264349	68.1859	8.01	0.05	0.0186	0.000399898	0	0	0	83.8507	4.28143	58.5081	1	1
安徽	琅琊	175	2020	4.0738	-0.38	0.35	0	0	0	284.016	536.92	0.408	0.171	0.000232	4.65066	0.0875436	68.1859	10.2	0.0215	0.0107	0.00379346	0	0	0	26.843	4.65066	58.5081	0	0
安徽	广德	176	2020	4.0692	0.17	-0.47	3	1.09861	0.0109861	96.8762	329.64	0.399	0.155	0.000171	5.59285	0.311542	68.1859	8.63	0.0161	0.0116	0.000595788	0	3	0.00645161	49.9132	5.59285	58.5081	0	0
安徽	龙子湖	177	2020	4.06851	-0.5	-0.35	0	0	0	396.409	536.92	0.408	0.171	0.000144	4.73525	0.0251608	68.1859	9.75	0.012	0.0064	0.004966	0	0	0	21.6875	4.73525	58.5081	0	0
安徽	颍泉	178	2020	4.06766	-0.49	0.18	0	0	0	506.503	536.92	0.408	0.171	0.000172	4.75497	0.0239882	68.1859	8.4	0.0265	0.0128	0.00175525	0	0	0	59.8004	4.75497	58.5081	1	1
江苏	灌南	179	2020	4.06303	-0.26	-0.26	0	0	0	429.106	396.94	0.229	0.153	0.000173	5.36679	0.236134	68.1859	8.38	0.0145	0.0068	0.00133385	0	0	0	61.2345	5.36679	58.5081	1	1
安徽	凤台	180	2020	4.06268	-0.22	1.56	0	0	0	423.533	305.88	0.355	0.155	0.000181	4.50166	0.212	68.1859	8.27	0.0112	0.0072	0.00121644	0	0	0	63.3385	4.50166	58.5081	1	1
安徽	歙	181	2020	4.06096	0.7	0.01	0	0	0	174.141	200.15	0.479	0.2	0.000181	5.44276	0.431521	68.1859	8.42	0.0217	0.0107	0.0001264	0	0	0	36.2962	5.44276	58.5081	0	0
安徽	祁门	182	2020	4.06027	0.14	-0.14	0	0	0	240.352	77.7	0.487	0.266	0.000138	5.35721	0.213873	68.1859	8.23	0.0043	0.0014	3.12894e-05	0	0	0	14.5644	5.35721	58.5081	0	0
安徽	泗	183	2020	4.05751	-0.38	-0.17	0	0	0	413.092	270.99	0.482	0.237	0.000376	5.07182	0.201431	68.1859	8.99	0.0229	0.0111	0.000627661	0	0	0	76.331	5.07182	58.5081	1	1
浙江	嵊泗	184	2020	4.05595	-0.12	-0.32	0	0	0	226.515	536.92	0.408	0.171	0.000142	4.85995	0.255965	68.1859	8.79	0.0037	0.0065	0.00248228	0	0	0	6.6903	4.85995	58.5081	0	0
安徽	利辛	185	2020	4.05404	-0.47	0.02	0	0	0	491.076	331.58	0.626	0.204	0.000146	4.85897	0.0928392	68.1859	7.78	0.022	0.0146	0.000528947	0	0	0	118.725	4.85897	58.5081	1	1
安徽	明光	186	2020	4.05231	-0.2	-0.29	0	0	0	343.373	246.65	0.546	0	0.000232	4.64808	0.258167	68.1859	9.1	0.0171	0.0106	0.000568824	0	0	0	48.5627	4.64808	58.5081	0	0
江苏	淮阴	187	2020	4.05109	-0.27	-0.29	0	0	0	385.632	549.76	0.33	0.123	0.000217	5.15618	0.168676	68.1859	9.15	0.0305	0.0095	0.00138135	0	0	0	74.8791	5.15618	58.5081	1	1
江苏	金湖	188	2020	4.04708	0.02	-0.28	0	0	0	322.262	337.03	0.357	0.147	0.000143	4.6759	0.301376	68.1859	9.1	0.0145	0.0073	0.000674748	0	0	0	28.9456	4.6759	58.5081	0	0
安徽	涡阳	189	2020	4.04568	-0.08	0.09	0	0	0	515.59	380.7	0.527	0.185	0.000139	5.04856	0.291032	68.1859	7.85	0.0203	0.0162	0.000688646	0	0	0	117.072	5.04856	58.5081	1	1
安徽	凤阳	190	2020	4.03601	0	-0.4	0	0	0	379.816	414.42	0.443	0.132	0.000232	4.66789	0.298771	68.1859	9.39	0.0192	0.0101	0.000791485	0	0	0	63.1934	4.66789	58.5081	1	1
安徽	郊	191	2020	4.03583	-0.37	-0.13	0	0	0	236.681	536.92	0.408	0.171	0.000147	4.51933	0.118412	68.1859	10.65	0.0154	0.0124	0.00102122	0	0	0	27.5094	4.51933	58.5081	0	0
安徽	定远	192	2020	4.03158	-0.19	-0.12	0	0	0	340.918	326.52	0.45	0.201	0.000125	4.36043	0.0842417	68.1859	9.12	0.0338	0.0132	0.000427176	0	0	0	67.1361	4.36043	58.5081	1	1
安徽	石台	193	2020	4.03069	-0.04	-0.08	0	0	0	257.002	28.26	0.475	0.563	0.000189	5.26392	0.255854	68.1859	8.05	0.0029	0.0016	4.81119e-05	0	0	0	8.0612	5.26392	58.5081	0	0
安徽	大观	194	2020	4.02785	-0.48	-0.14	0	0	0	303.78	536.92	0.408	0.171	0.000143	5.03176	0.0224305	68.1859	10.16	0.0189	0.0127	0.00222151	0	0	0	21.4112	5.03176	58.5081	0	0
安徽	萧	195	2020	4.02731	-0.36	-0.25	0	0	0	548.402	393.24	0.48	0.212	0.000135	5.51969	0.231147	68.1859	8.78	0.0284	0.0107	0.000931152	0	0	0	105.46	5.51969	58.5081	1	1
安徽	霍邱	196	2020	4.02589	-0.31	0.39	0	0	0	434.633	227.59	0.558	0.411	0.000232	4.41437	0.226128	68.1859	7.91	0.0243	0.011	0.000480266	0	0	0	94.4985	4.41437	58.5081	1	1
江苏	金坛	197	2020	4.02571	0.12	-0.34	0	0	0	168.291	973.15	0.251	0.09	0.000182	4.4507	0.37205	68.1859	9.51	0.0266	0.022	0.00325766	0	0	0	58.5081	4.4507	58.5081	1	1
安徽	固镇	198	2020	4.02034	-0.37	-0.37	0	0	0	430.62	311.58	0.354	0.131	0.000323	5.03664	0.227363	68.1859	8.11	0.0115	0.0064	0.000563239	0	0	0	50.1449	5.03664	58.5081	0	0
浙江	洞头	199	2020	4.01818	-0.16	-0.27	0	0	0	289.353	114.42	0.316	0.277	0.000161	5.50462	0.100363	68.1859	9.1	0.0081	0.0052	0.00290876	0	0	0	14.8807	5.50462	58.5081	0	0
安徽	杜集	200	2020	4.01692	-0.34	-0.44	0	0	0	517.1	536.92	0.408	0.171	0.000265	5.41799	0.163938	68.1859	8.61	0.0088	0.004	0.00368565	0	0	0	23.9692	5.41799	58.5081	0	0
安徽	义安	201	2020	4.01674	-0.17	0.76	0	0	0	238.537	158.8	0	0.203	0.000181	4.86436	0.261573	68.1859	8.31	0.0082	0.0066	0.0014097	0	0	0	22.7493	4.86436	58.5081	0	0
安徽	休宁	202	2020	4.01024	0.33	-0.38	0	0	0	197.436	116.32	0.528	0.231	0.000177	5.45849	0.475601	68.1859	8.14	0.009	0.0035	0.000115149	0	0	0	21.1456	5.45849	58.5081	0	0
安徽	大通	203	2020	4.00951	-0.45	-0.2	0	0	0	393.243	536.92	0.408	0.171	0.000183	4.36167	0.0542357	68.1859	8.73	0.0076	0.0031	0.00245127	0	0	0	16.5671	4.36167	58.5081	0	0
安徽	怀远	204	2020	4.00077	-0.23	-0.1	0	0	0	409.029	425.06	0.551	0.179	0.000184	4.75424	0.234487	68.1859	7.87	0.0159	0.0089	0.00050512	0	0	0	93.5335	4.75424	58.5081	1	1
江苏	涟水	205	2020	4.0004	-0.27	-0.52	0	0	0	396.59	554.05	0.37	0.132	0.000179	5.21964	0.138004	68.1859	9.07	0.0292	0.0117	0.00102608	0	0	0	82.9699	5.21964	58.5081	1	1
安徽	谢家集	206	2020	3.99545	-0.48	-0.22	0	0	0	405.179	536.92	0.408	0.171	0.000229	4.34123	0.0224305	68.1859	8.73	0.0079	0.0042	0.00168364	0	0	0	22.1589	4.34123	58.5081	0	0
江苏	射阳	207	2020	3.99397	-0.38	-0.43	0	0	0	385.877	592.36	0.375	0.162	0.000134	4.85593	0.0678689	68.1859	8.67	0.0354	0.0122	0.000720179	0	0	0	75.9403	4.85593	58.5081	1	1
安徽	颍东	208	2020	3.99046	-0.41	0.15	0	0	0	502.121	536.92	0.408	0.171	0.000226	4.74899	0.0847087	68.1859	8.27	0.0189	0.0098	0.00201193	0	0	0	53.8187	4.74899	58.5081	0	0
安徽	和	209	2020	3.98843	-0.3	-0.02	0	0	0	235.468	266.75	0.432	0.188	0.000191	4.82348	0.203784	68.1859	7.92	0.0116	0.0051	0.00126784	0	0	0	41.0899	4.82348	58.5081	0	0
安徽	徽州	210	2020	3.98192	0.16	-0.35	0	0	0	182.631	536.92	0.408	0.171	0.000162	5.44789	0.215591	68.1859	8.8	0.0033	0.0036	0.000374473	0	0	0	9.6162	5.44789	58.5081	0	0
安徽	南谯	211	2020	3.97086	-0.22	-0.36	0	0	0	269.236	536.92	0.408	0.171	0.000198	4.73933	0.0880706	68.1859	9.65	0.0252	0.0116	0.00128725	0	0	0	34.8762	4.73933	58.5081	0	0
江苏	响水	212	2020	3.9701	-0.28	-0.31	0	0	0	436.928	405.74	0.259	0.176	0.000152	5.3527	0.158119	68.1859	8.13	0.0098	0.0061	0.00113468	0	0	0	45.9156	5.3527	58.5081	0	0
安徽	烈山	213	2020	3.96935	-0.31	-0.24	0	0	0	510.098	536.92	0.408	0.171	0.000232	5.36993	0.0687102	68.1859	8.94	0.0058	0.0032	0.00317173	0	0	0	24.9237	5.36993	58.5081	0	0
江苏	洪泽	214	2020	3.96935	-0.32	0.45	0	0	0	354.498	343.65	0.343	0.147	0.000232	4.9224	0.166506	68.1859	8.71	0.013	0.0048	0.0007207	0	0	0	28.5097	4.9224	58.5081	0	0
江苏	姜堰	215	2020	3.96689	0.28	-0.09	0	0	0	246.033	687.49	0.235	0.116	0.000169	4.6086	0.506978	68.1859	9.11	0.0273	0.0127	0.00291674	0	0	0	66.8408	4.6086	58.5081	1	1
安徽	淮上	216	2020	3.96367	-0.41	-0.37	0	0	0	397.817	536.92	0.408	0.171	0.000232	4.74898	0.127143	68.1859	8.41	0.0107	0.0037	0.00230074	0	0	0	28.3872	4.74898	58.5081	0	0
安徽	湾沚	217	2020	3.96062	-0.44	0.06	0	0	0	179.446	536.92	0.408	0.171	0.000225	5.20894	0.0201677	68.1859	8.175	#N/A	0.00635	0.00189293	0	0	0	34.4016	5.20894	58.5081	0	0
安徽	含山	218	2020	3.95124	-0.37	0.19	0	0	0	252.96	204.21	0.476	0.165	0.000232	4.61155	0.182337	68.1859	7.94	0.0167	0.009	0.000917021	0	0	0	33.6588	4.61155	58.5081	0	0
安徽	无为	219	2020	3.94797	-0.26	-0.35	0	0	0	241.868	511.04	0.32	0.13	0.000232	4.68461	0.206524	68.1859	7.87	0.0614	0.0255	0.000713845	0	0	0	81.7997	4.68461	58.5081	1	1
江苏	港闸	220	2020	3.94526	-0.46	-0.35	0	0	0	203.686	536.92	0.408	0.171	0.000142	5.12269	0.00999998	68.1859	10.54	0.0404	0.0134	0.000827169	0	0	0	40.3176	5.12269	58.5081	0	0
安徽	叶集	221	2020	3.92868	-0.44	-0.46	0	0	0	440.528	536.92	0.408	0.171	0.00018	4.76097	0.0179627	68.1859	8.35	0.0045	0.0023	0.000940493	0	0	0	21.6229	4.76097	58.5081	0	0
安徽	八公山	222	2020	3.918	-0.36	-0.41	0	0	0	409.334	536.92	0.408	0.171	0.000171	4.38671	0.0951439	68.1859	9.2	0.0046	0.0035	0.00316522	0	0	0	11.8221	4.38671	58.5081	0	0
安徽	潘集	223	2020	3.91002	-0.4	0.3	0	0	0	419.448	536.92	0.408	0.171	0.000232	4.45971	0.0703071	68.1859	8.02	0.0029	0.004	0.00203583	0	0	0	32.6077	4.45971	58.5081	0	0
江苏	大丰	224	2020	3.90962	0.25	-0.58	0	0	0	324.6	686.78	0.3	0.164	0.000232	4.6246	0.439046	68.1859	9.04	0.0262	0.0209	0.00120371	0	0	0	64.5603	4.6246	58.5081	1	1
浙江	龙港	225	2020	3.86974	-0.42	-0.58	14	2.63906	0.0263906	268.782	536.92	0.408	0.171	0.000232	5.67875	0.0252038	68.1859	8.59	0.0149	0.0137	0.00538654	0.0754115	14	0.0301075	46.4732	5.67875	58.5081	0	0
											2020.49	1.011	0.586	0.000438	5.70906	0.705867	88.6791	12.93	#N/A	0.2919	0.0063	0.52143	465	1	225.887	5.70906
