# Supplementary material
Source: Research Square preprint supplement (doi:10.21203/rs.3.rs-8765905/v1)
Supplement: Supplementary file 2 [file ede51c6b64c812c64ab7dcf5.xlsx]

## Sheet: 12
北京市平谷区东高村镇崔家庄村（西红柿）
北京市平谷区镇罗营镇五里庙村（红果）
北京市房山区周口店镇黄山店村（休闲旅游）
天津市蓟州区桑梓镇（西瓜）
天津市静海区良王庄乡罗阁庄村（梨）
河北省石家庄市深泽县白庄乡小堡村（布艺）
河北省石家庄市晋州市总十庄镇武邱村（梨）
河北省保定市蠡县蠡吾镇随东村（麻山药）
河北省保定市曲阳县孝墓镇孙家庄村（苹果）
河北省唐山市开平区洼里镇西尚庄村（无花果）
河北省唐山市曹妃甸区第四农场和顺村（稻米）
河北省邢台市宁晋县河渠镇马房村（烘焙食品）
河北省邢台市信都区将军墓镇南沟门村（香菇）
河北省邢台市威县高公庄乡（设施蔬菜）
河北省廊坊市永清县刘街乡彩木营村（西红柿）
河北省廊坊市文安县兴隆宫镇大龙华村（梨）
河北省邯郸市肥乡区天台山镇任堡村（生地、药菊）
河北省邯郸市魏县魏城镇东南温村（梨）
河北省张家口市蔚县蔚州镇南张庄村（剪纸）
河北省秦皇岛市抚宁区王汉沟村（黄桃）
河北省秦皇岛市昌黎县靖安镇马芳营村（旱黄瓜）
河北省衡水市深州市北溪村镇东凌消村（红薯）
河北省衡水市深州市北溪村镇大流村（花生）
河北省沧州市南皮县冯家口镇李皇亲村（彩麦）
河北省沧州市孟村回族自治县高寨镇（肉鸡）
山西省太原市清徐县徐沟镇西怀远村（蔬菜）
山西省大同市云州区西坪镇（黄花菜）
山西省朔州市怀仁市海北头乡（肉羊）
山西省忻州市偏关县窑头乡（谷子）
山西省临汾市吉县屯里镇（苹果）
山西省临汾市乡宁县双鹤乡红凹村（小麦）
山西省运城市临猗县北辛乡（苹果）
山西省吕梁市临县三交镇正街村（杂粮）
山西省晋中市平遥县岳壁乡岳北村（蔬菜）
山西省晋中市灵石县两渡镇崔家沟村（生猪）
内蒙古自治区赤峰市林西县统部镇（肉牛）
内蒙古自治区赤峰市松山区老府镇老府村（设施蔬菜）
内蒙古自治区赤峰市巴林左旗三山乡（苍术）
内蒙古自治区赤峰市宁城县忙农镇（肉牛）
内蒙古自治区呼和浩特市土默特左旗敕勒川镇枳几梁村（葵花）
内蒙古自治区呼伦贝尔市阿荣旗新发朝鲜族乡新发村（稻米）
内蒙古自治区鄂尔多斯市鄂托克旗苏米图苏木（肉牛）
内蒙古自治区鄂尔多斯市准格尔旗暖水乡德胜有梁村（苹果）
内蒙古自治区通辽市科尔沁左翼中旗希伯花镇希伯花嘎查（苹果）
内蒙古自治区锡林郭勒盟市西乌珠穆沁旗浩勒图高勒镇（肉牛）
内蒙古自治区乌兰察布市四子王旗查干补力格苏木格日勒图雅嘎查（肉羊）
内蒙古自治区巴彦淖尔市乌拉特中旗巴音乌兰苏木巴音宝日嘎查（马）
内蒙古自治区巴彦淖尔市乌拉特前旗明安镇六份子村（黄芪）
辽宁省沈阳市康平县海州窝堡乡（花生）
辽宁省沈阳市于洪区平罗街道前辛台村（设施蔬菜）
辽宁省沈阳市新民市梁山镇（西瓜）
辽宁省大连市长海县大长山岛镇三官庙村（海参）
辽宁省丹东市东港市小甸子镇三道林村（草莓）
辽宁省阜新市阜蒙县老河土镇敖龙胡同村（花生）
辽宁省营口市大石桥市旗田镇新开河村（圣女果）
辽宁省鞍山市台安县八角台街道雅化村（花卉）
辽宁省葫芦岛市兴城市碱厂满族乡白庙子村（南果梨）
辽宁省朝阳市龙城区海龙街道饮马池村（葡萄）
吉林省长春市公主岭市南崴子街道南崴子村（稻米）
吉林省长春市双阳区齐家镇李家村（黄菇娘）
吉林省四平市伊通满族自治县马鞍山镇（樱桃）
吉林省辽源市东丰县黄河镇涌泉村（肉牛）
吉林省延边朝鲜族自治州安图县新合乡青沟子村（桑黄）
吉林省延边朝鲜族自治州汪清县鸡冠乡（黑木耳）
吉林省吉林市磐石市宝山乡北锅盔村（苹果）
吉林省白城市通榆县瞻榆镇西关村（辣椒）
黑龙江省哈尔滨市延寿县中和镇万江村（黑稻）
黑龙江省哈尔滨市呼兰区康金街道白家村（大豆）
黑龙江省哈尔滨市五常市牛家满族镇政新村（西瓜）
黑龙江省齐齐哈尔市铁锋区扎龙镇哈拉乌苏村（休闲旅游）
黑龙江省齐齐哈尔市富拉尔基区杜尔门沁达斡尔族乡杜尔门沁村（稻米）
黑龙江省齐齐哈尔市富裕县繁荣乡永丰村（防风）
黑龙江省齐齐哈尔市克东县昌盛乡翻身村（速冻蔬菜）
黑龙江省大庆市杜尔伯特蒙古族自治县江湾乡（稻米）
黑龙江省大庆市肇源县浩德乡莲花村（羊肚菌）
黑龙江省鸡西市密山市兴凯镇（牛乳）
黑龙江省佳木斯市桦川县苏家店镇新胜村（山药）
黑龙江省双鸭山市宝清县夹信子镇团结村（鲜食玉米）
黑龙江省七台河市新兴区长兴乡马鞍村（生猪）
上海市浦东新区书院镇（西瓜）
上海市闵行区浦江镇革新村（休闲旅游）
上海市奉贤区青钱镇钱忠村（雉鸡）
江苏省南京市高淳区漆桥街道双游村（电子商务）
江苏省苏州市张家港市凤凰镇（水蜜桃）
江苏省无锡市惠山区洛社镇万马村（休闲旅游）
江苏省徐州市沛县敬安镇（辣椒）
江苏省常州市溧阳市戴埠镇（休闲旅游）
江苏省南通市如东县大豫镇强民村（蔬菜）
江苏省连云港市经技开发区朝阳街道韩李村（黄桃）
江苏省淮安市洪泽区岔河镇韦集村（河蟹）
江苏省盐城市大丰区南阳镇诚心村（辣根）
江苏省扬州市仪征市马集镇方营村（茶）
江苏省镇江市句容市白兔镇中心村（茶）
江苏省泰州市兴化市千垛镇（休闲旅游）
江苏省泰州市医药高新区永安洲镇东江社区（河豚）
江苏省宿迁市泗洪县龙集镇（小龙虾）
江苏省宿迁市宿城区陈集镇（葡萄）
浙江省杭州市富阳区富春街道拔山村（龙井茶）
浙江省杭州市临平区塘栖镇塘栖村（枇杷）
浙江省温州市苍南县马站镇中魁村（四季柚）
浙江省湖州市南浔区善琏镇善琏村（湖笔）
浙江省湖州市长兴县吕山乡（湖羊）
浙江省嘉兴市南湖区新丰镇（姜）
浙江省绍兴市新昌县镜岭镇雅庄村（休闲旅游）
浙江省台州市临海市涌泉镇（柑橘）
浙江省金华市浦江县虞宅乡（休闲旅游）
浙江省衢州市衢江区高家镇（柑橘）
浙江省丽水市缙云县东方镇（菜干）
安徽省合肥市肥东县牌坊回族满族乡（杭椒）
安徽省宿州市泗县大路口镇（山芋）
安徽省安庆市太湖县天华镇（茶）
安徽省安庆市潜山市槎水镇中畈村（蚕桑）
安徽省黄山市黄山区新华乡（笋）
安徽省蚌埠市固镇县石湖乡刘元村（西瓜）
安徽省阜阳市颍泉区闻集镇闻集村（草莓）
安徽省淮南市寿县板桥镇清真村（草席）
安徽省滁州市定远县西卅店镇高潮村（双孢菇）
安徽省六安市霍邱县城西湖乡望湖村（莲藕）
安徽省芜湖市无为市红庙镇海云村（牡丹）
安徽省宣城市泾县榔桥镇溪头村（木梳）
安徽省铜陵市枞阳县麒麟镇岱鳌村（白茶）
福建省福州市连江县筱埕镇（海带）
福建省福州市闽清县塔庄镇茶口村（粉干）
福建省厦门市海沧区东孚街道过坂社区（花卉）
福建省泉州市安溪县祥华乡（乌龙茶）
福建省泉州市永春县达埔镇汉口村（蔑香）
福建省三明市尤溪县台溪乡（茶）
福建省漳州市漳浦县佛昙镇东坂村（河豚）
福建省莆田市仙游县龙华镇金溪村（乌龙茶）
福建省南平市武夷山市星村镇桐木村（红茶）
福建省龙岩市连城县朋口镇朋东村（兰花）
福建省宁德市福安市穆阳镇苏堤村（线面）
福建省平潭综合实验区君山镇砂美村（鲍鱼）
江西省赣州市安远县鹤子镇（脐橙）
江西省赣州市信丰县安西镇（脐橙）
江西省吉安市吉水县水南镇（腐竹）
江西省宜春市高安市上湖乡（辣椒）
江西省九江市柴桑区新合镇址坊村（豆条）
江西省抚州市黎川县德胜镇（鹿茸菇）
江西省新佘市渝水区姚圩镇裴港村（蜜桔）
江西省景德镇市乐平市高家镇（白茶）
江西省上饶市鄱阳县乐丰镇（稻米）
江西省鹰潭市余江区平定乡洪桥村（红薯）
山东省济南市平阴县玫瑰镇（玫瑰）
山东省济南市长清区五峰山街道（大樱桃）
山东省青岛市平度市崔家集镇（西红柿）
山东省淄博市沂源县西里镇红源新村（苹果）
山东省枣庄市滕州市龙阳镇（马铃薯）
山东省东营市东营区牛庄镇（小麦）
山东省烟台市牟平区龙泉镇（休闲旅游）
山东省烟台市莱州市平里店镇吕村（姜）
山东省潍坊市诸城市相州镇（生猪）
山东省潍坊市寒亭区双杨街道前阙庄村（番茄）
山东省济宁市微山县昭阳街道（大闸蟹）
山东省济宁市鱼台县鱼城镇（辣椒）
山东省泰安市泰山区省庄镇（茶）
山东省威海市文登区葛家镇（苹果）
山东省日照市莒县果庄镇（油桃）
山东省临沂市沂南县苏村镇（设施蔬菜）
山东省临沂市兰陵县神山镇（大蒜）
山东省德州市临邑县临盘街道前杨村（休闲旅游）
山东省德州市武城县武城镇（辣椒）
山东省聊城市阳谷县安乐镇（肉鸡）
山东省滨州市博兴县乔庄镇苍上村（南美白对虾）
山东省滨州市无棣县车王镇（肉牛）
山东省菏泽市牡丹区沙土镇（蔬菜）
山东省菏泽市曹县普连集镇（小麦）
河南省郑州市中牟县姚家镇春岗村（草莓）
河南省开封市杞县傅集镇吕寨村（双孢菇）
河南省洛阳市汝阳县付店镇（香菇）
河南省洛阳市栾川县白土镇马超营社区（无核柿子）
河南省平顶山市宝丰县商酒务镇韩庄村（秋月梨）
河南省平顶山市舞钢市尹集镇蔡庄村（葡萄）
河南省鹤壁市浚县黎阳街道单庄村（设施蔬菜）
河南省新乡市平原示范区桥北乡盐店庄村（蜜桃）
河南省焦作市沁阳市紫陵镇坞头村（头饰品）
河南省濮阳市濮阳县文留镇齐庄村（丝瓜）
河南省许昌市禹州市磨街乡刘门村（柿饼）
河南省漯河市临颍县石桥乡三角村（白鹅）
河南省三门峡市卢氏县官道口镇果岭村（苹果）
河南省南阳市唐河县滨河街道王庄村（红薯）
河南省商丘市睢县城郊乡李庄村（辣椒）
河南省商丘市民权县王桥镇麻花庄村（贡麻花）
河南省信阳市罗山县灵山镇檀墩村（信阳毛尖）
河南省信阳市新县吴陈河镇章墩村（香菇）
河南省周口市项城市孙店镇汝阳刘村（毛笔）
河南省周口市扶沟县汴岗镇于营村（辣椒）
河南省驻马店市泌阳县杨家集镇郭庄村（香菇）
河南省驻马店市正阳县王勿桥乡王勿桥社区（伏陈醋）
河南省济源市克井镇枣庙村（冬凌草）
湖北省襄阳市宜城市南营街道金山村（水果）
湖北省黄冈市黄梅县下新镇（鱼面）
湖北省黄冈市浠水县散花镇天井湖村（菱角）
湖北省十堰市郧阳区青山镇（茶）
湖北省十堰市郧西县香口乡（蔬菜）
湖北省孝感市云梦县下辛店镇白水湖村（藜蒿）
湖北省孝感市大悟县河口镇金墩村（抹茶）
湖北省宜昌市枝江市安福寺镇（柑橘）
湖北省宜昌市长阳土家族自治县榔坪镇关口垭村（木瓜）
湖北省荆门市钟祥市客店镇邵台村（葛根）
湖北省荆州市松滋市万家乡（柑橘）
湖北省荆州市公安县闸口镇（虾稻）
湖北省鄂州市华容区蒲团乡（稻米）
湖北省黄石市阳新县枫林镇坳上村（吴茱萸）
湖北省恩施土家族苗族自治州咸丰县唐崖镇彭家沟村（黑猪）
湖北省恩施土家族苗族自治州来凤县革勒车镇土家寨村（黄精）
湖北省潜江市周矶管理区红旗社区（潜半夏）
湖北省天门市佛子山镇（稻米）
湖南省长沙市长沙县春华镇（水稻、蔬菜种子）
湖南省长沙市浏阳市关口街道道源湖村（粽子）
湖南省邵阳市新宁县黄龙镇羊坪村（脐橙）
湖南省益阳市大通湖区金盆镇（稻虾）
湖南省益阳市桃江县马迹塘镇南山村（竹笋）
湖南省湘潭市雨湖区姜畲镇泉塘子村（鸡枞菌）
湖南省娄底市新化县白溪镇（豆腐）
湖南省岳阳市华容县禹山镇八岭村（湘枳壳）
湖南省岳阳市岳阳县新墙镇清水村（葡萄）
湖南省常德市澧县王家厂镇大团村（石菖蒲）
湖南省张家界市慈利县洞溪乡洞溪村（辣椒）
湖南省张家界市永定区茅岩河镇大米界村（莓茶）
湖南省衡阳市衡阳县西渡镇梅花村（休闲旅游）
湖南省永州市江华瑶族自治县小圩壮族乡崇江村（苦茶）
湖南省株洲市醴陵市板杉镇擂鼓桥村（油茶）
湖南省郴州市北湖区华塘镇吴山村（草莓）
湖南省怀化市通道侗族自治县独坡镇上岩村（茶）
湖南省湘西土家族苗族自治州永顺县颗砂乡（稻米）
湖南省湘西土家族苗族自治州龙山县红岩溪镇肖家坪村（黄金茶）
广东省广州市从化区太平镇钱岗村（荔枝）
广东省珠海市金湾区红旗镇大林社区（黄立鱼）
广东省河源市紫金县敬梓镇田头村（牛大力）
广东省河源市龙川县黄石镇长洲村（油茶）
广东省肇庆市广宁县潭布镇古楼村（番薯）
广东省韶关市浈江区犁市镇（油茶）
广东省梅州市丰顺县八乡山镇（番薯）
广东省惠州市博罗县石坝镇（三黄胡须鸡）
广东省汕尾市海丰县海城镇（茶）
广东省江门市开平市大沙镇（茶）
广东省阳江市阳春市圭岗镇（丝瓜）
广东省清远市连山壮族瑶族自治县永和镇（丝苗米）
广东省潮州市饶平县浮滨镇（茶）
广东省云浮市新兴县簕竹镇（肉鸡）
广东省云浮市罗定市罗镜镇（丝苗米）
广东省中山市三角镇（杂交鳢）
广东省中山市横栏镇（花卉苗木）
广东省东莞市厚街镇（荔枝）
广西壮族自治区北海市铁山港区营盘镇彬塘村（珍珠）
广西壮族自治区桂林市全州县咸水镇（柑桔）
广西壮族自治区梧州市岑溪市糯垌镇古河村（澳洲坚果）
广西壮族自治区防城港市上思县在妙镇佛子村（思奉香糯）
广西壮族自治区钦州市浦北县龙门镇（浦北陈皮）
广西壮族自治区贵港市覃塘区樟木镇（生猪）
广西壮族自治区玉林市兴业县沙塘镇（稻米）
广西壮族自治区百色市田东县林逢镇（芒果）
广西壮族自治区百色市隆林县德峨镇三冲村（茶）
广西壮族自治区百色市凌云县下甲镇平怀村（桑蚕）
广西壮族自治区百色市乐业县甘田镇板洪村（猕猴桃）
广西壮族自治区百色市德保县城关镇那温村（休闲旅游）
广西壮族自治区贺州市富川县朝东镇（香芋）
广西壮族自治区来宾市象州县妙皇乡思高村（古琶茶）
广西壮族自治区河池市宜州区北山镇（糖料蔗）
广西壮族自治区河池市罗城县小长安镇（糖料蔗）
广西壮族自治区柳州市鹿寨县黄冕镇（桑蚕）
广西壮族自治区柳州市三江县林溪镇平岩村（休闲旅游）
海南省海口市美兰区三江镇茄苪村（莲雾）
海南省万宁市和乐镇六连村（鸭蛋）
海南省东方市感城镇不磨村（芒果）
海南省昌江黎族自治县海尾镇大安村（黑皮冬瓜）
重庆市巴南区姜家镇（黒五谷）
重庆市大足区雍溪镇（花卉）
重庆市铜梁区双山镇建新村（樱桃）
重庆市潼南区古溪镇（佛手）
重庆市丰都县三元镇（红心柚）
重庆市永川区何埂镇狮子村（秀珍菇、香菇）
重庆市武隆区后坪乡高坪村（茶）
重庆市城口县坪坝镇新华村（休闲旅游）
重庆市奉节县龙桥土家族乡（蔬菜）
重庆市万盛经开区丛林镇绿水村（金针菇、舞茸）
四川省成都市崇州市白头镇五星村（稻米）
四川省自贡市贡井区成佳镇（大头菜）
四川省德阳市中江县永安镇永安村（中江柚）
四川省绵阳市涪城区杨家镇（蚕桑）
四川省广元市昭化区昭化镇朝阳村（猕猴桃）
四川省广元市旺苍县木门镇（茶）
四川省遂宁市蓬溪县天福镇（杏鲍菇、虫草花）
四川省乐山市峨眉山市双福镇（茶）
四川省乐山市金口河区永胜乡民主村（川牛膝）
四川省南充市蓬安县睦坝镇（稻米）
四川省宜宾市筠连县巡司镇（茶）
四川省宜宾市屏山县锦屏镇（茵红李）
四川省广安市武胜县胜利镇三叉沟村（晚熟柑桔）
四川省达州市大竹县团坝镇（白茶）
四川省达州市万源市旧院镇大伦坎村（黑鸡蛋）
四川省眉山市丹棱县齐乐镇（柑橘）
四川省阿坝藏族羌族自治州金川县河西乡杨家湾村（雪梨）
四川省阿坝藏族羌族自治州红原县邛溪镇（牦牛）
四川省甘孜藏族自治州九龙县魁多镇里伍村（茶）
四川省甘孜藏族自治州德格县麦宿镇（藏木香、大黄）
四川省凉山彝族自治州会理市彰冠镇（石榴）
四川省凉山彝族自治州雷波县金沙镇金沙村（脐橙）
四川省凉山彝族自治州盐源县树河镇大水田村（核桃）
四川省凉山彝族自治州越西县新民镇大屯村（苹果）
贵州省贵阳市息烽县石硐镇中坝村（猕猴桃）
贵州省贵阳市息烽县养龙司镇灯塔村（百香果）
贵州省毕节市赫章县平山镇平山社区（天麻）
贵州省安顺市黄果树旅游区白水镇（小黄姜）
贵州省安顺市关岭县断桥镇戈尧村（枇杷）
贵州省黔东南苗族侗族自治州剑河县柳川镇镇江村（麻镰秧李）
贵州省黔东南苗族侗族自治州凯里市下司镇（蔬菜）
贵州省黔东南苗族侗族自治州黎平县高屯街道高屯社区（茶）
贵州省黔南布依族苗族自治州瓮安县建中镇（茶）
贵州省黔南布依族苗族自治州龙里县湾滩河镇（蔬菜）
贵州省黔南布依族苗族自治州罗甸县木引镇（蜂糖李）
贵州省黔西南州望谟县郊纳镇（茶）
贵州省黔西南州晴隆县鸡场镇学官社区（脐橙）
贵州省铜仁市印江县洋溪镇蒋家坝村（茶）
贵州省铜仁市玉屏县田坪镇田冲村（稻米）
贵州省铜仁市松桃县正大镇（茶）
贵州省遵义市习水县隆兴镇新光村（葡萄）
贵州省遵义市桐梓县官仓镇楠木村（官梨）
云南省昆明市安宁市禄脿街道艾家营村（葡萄）
云南省昆明市嵩明县杨桥街道大村子社区（花卉）
云南省昭通市昭阳区靖安镇（马铃薯）
云南省昭通市镇雄县杉树乡细沙河村（竹子）
云南省昭通市镇雄县罗坎镇大庙村（茶）
云南省昭通市绥江县会仪镇黄坪村（李子）
云南省昭通市大关县木杆镇向阳村（筇竹）
云南省曲靖市宣威市东山镇法着村（肉牛）
云南省保山市腾冲市清水乡清水社区（茶）
云南省丽江市宁蒗县新营盘乡（苹果）
云南省丽江市华坪县荣将镇和爱村（芒果）
云南省普洱市景东县大街镇（茶）
云南省楚雄彝族自治州楚雄市大过口乡（魔芋）
云南省红河哈尼族彝族自治州蒙自市文澜街道多法勒村（枇杷）
云南省西双版纳傣族自治州景洪市勐养镇曼纳庄村（青枣）
云南省大理白族自治州云龙县诺邓镇（火腿）
云南省大理白族自治州南涧县无量山镇（茶）
云南省迪庆藏族自治州香格里拉市三坝乡白地村（羊肚菌）
云南省迪庆藏族自治州德钦县升平镇阿东村（葡萄）
西藏自治区昌都市卡若区噶玛乡（唐卡）
西藏自治区日喀则市白朗县旺丹乡桑巴村（皮制品）
陕西省西安市周至县青化镇二庙村（猕猴桃）
陕西省宝鸡市太白县咀头镇（高山蔬菜）
陕西省宝鸡市岐山县蔡家坡镇安乐村（猕猴桃）
陕西省咸阳市淳化县铁王镇（番茄）
陕西省咸阳市三原县嵯峨镇天井岸村（花椒）
陕西省铜川市耀州区庙湾镇（香菇）
陕西省渭南市合阳县金峪镇（樱桃）
陕西省榆林市吴堡县张家山镇（空心挂面）
陕西省汉中市城固县董家营镇（元胡）
陕西省汉中市镇巴县兴隆镇水田坝社区（茶）
陕西省安康市汉滨区晏坝镇（茶）
陕西省商洛市柞水县杏坪镇（木耳）
陕西省延安市志丹县顺宁镇保娃沟门村（蔬菜）
陕西省榆林市榆阳区红石桥乡西左界村（芝麻香瓜）
甘肃省兰州市永登县七山乡（肉羊）
甘肃省酒泉市玉门市昌马镇（肉羊）
甘肃省酒泉市肃州区泉湖镇四坝村（设施蔬菜）
甘肃省张掖市甘州区党寨镇陈寨村（设施蔬菜）
甘肃省张掖市山丹县东乐镇（肉羊）
甘肃省金昌市永昌县朱王堡镇（高原夏菜）
甘肃省天水市张家川回族自治县龙山镇（肉牛）
甘肃省天水市张家川回族自治县刘堡镇窑儿村（乌龙头）
甘肃省天水市清水县郭川镇郭山村（花椒）
甘肃省武威市民勤县东坝镇东一村（人参果）
甘肃省庆阳市镇原县太平镇枣林村（苹果）
甘肃省定西市陇西县巩昌镇河那坡村（设施蔬菜）
甘肃省定西市岷县寺沟镇立珠村（猫尾草）
甘肃省临夏回族自治州康乐县胭脂镇大庄村（食用菌）
青海省西宁市湟中区上五庄镇小寺沟村（蒜苗）
青海省海东市互助土族自治县五峰镇下马一村（手工布鞋）
青海省海南藏族自治州贵德县新街乡陆切村（红笋）
青海省海北藏族自治州门源回族自治县泉口镇（香菇）
青海省黄南藏族自治州尖扎县当顺乡香干村（土烧馍）
青海省黄南藏族自治州泽库县和日镇吉龙村（泽库羊）
青海省玉树藏族自治州玉树市上拉秀乡加桥村（牦牛）
青海省果洛藏族自治州达日县满掌乡木热村（牦牛）
宁夏回族自治区银川市灵武市临河镇上桥村（长枣）
宁夏回族自治区石嘴山市惠农区红果子镇宝马村（牛乳）
宁夏回族自治区吴忠市盐池县冯记沟乡雨强村（滩羊）
宁夏回族自治区吴忠市红寺堡区红寺堡镇弘德村（肉牛）
宁夏回族自治区固原市原州区彭堡镇（冷凉蔬菜）
新疆维吾尔自治区乌鲁木齐市米东区三道坝镇（稻米）
新疆维吾尔自治区塔城地区裕民县哈拉布乡（红花）
新疆维吾尔自治区阿克苏地区乌什县阿恰塔格乡（核桃）
新疆维吾尔自治区和田地区于田县希吾勒乡（肉羊）
新疆维吾尔自治区昌吉回族自治州奇台县半截沟镇腰站子村（小麦）
新疆维吾尔自治区伊犁哈萨克自治州新源县吐尔根乡喀拉奥依村（杏）
新疆维吾尔自治区巴音郭楞蒙古自治州州库尔勒市英下乡阿克东村（设施蔬菜）
新疆维吾尔自治区哈密市伊州区二堡镇火石泉村（葡萄）
新疆维吾尔自治区吐鲁番市托克逊县夏镇南湖村（杏）
新疆维吾尔自治区喀什地区喀什市英吾斯坦乡墩艾日克村（乳鸽）
新疆维吾尔自治区阿克苏地区阿克苏市喀拉塔勒镇英阿克艾日克村（棉花）
新疆生产建设兵团第二师铁门关市30团（库尔勒香梨）
新疆生产建设兵团第五师双河市87团（玉米种子）
新疆生产建设兵团第十师北屯市184团（辣椒）
新疆生产建设兵团第五师双河市84团1连（骆驼奶）

## Sheet: 11
北京市顺义区龙湾屯镇山里辛庄村（酥梨）
北京市顺义区杨镇东焦各庄村（草莓）
北京市平谷区峪口镇东凡各庄村（休闲旅游）
北京市延庆区井庄镇柳沟村（休闲旅游）
天津市宝坻区黄庄镇小辛码头村（稻旅）
天津市滨海新区茶淀镇（葡萄）
天津市东丽区胡张庄村（葡萄）
天津市蓟州区罗庄子镇（酥梨）
天津市武清区崔黄口镇坨尼寺村（西红柿）
河北省石家庄藁城区贾市庄镇马邱村（梨文化）
河北省石家庄市赵县谢庄乡南龙化村（扫帚）
河北省石家庄市鹿泉区白鹿泉乡谷家峪村（香椿）
河北省张家口市万全区高庙堡乡於家梁村（肉羊）
河北省承德市隆化县西阿超满族蒙古族乡砬子沟村（杂粮）
河北省秦皇岛昌黎县新集镇（马铃薯）
河北省秦皇岛市青龙满族自治县肖营子镇（板栗）
河北省唐山市遵化市团瓢庄乡山里各庄村（休闲旅游）
河北省唐山市曹妃甸区双井镇李家房子村（休闲旅游）
河北省廊坊市永清县龙虎庄乡瓦屋辛庄村（瓜果）
河北省保定市曲阳县孝墓镇（苹果）
河北省保定市竞秀区江城乡大激店村（驿站文化）
河北省保定市博野县博野镇杜各庄村（中药材）
河北省沧州市东光县连镇镇（谷物食品）
河北省衡水市饶阳县大尹村镇南北岩村（瓜果）
河北省衡水市景县王谦寺镇马贾庄村（高粱）
河北省邢台市信都区将军墓镇（板栗）
河北省邢台市沙河市新城镇小屯桥村（工艺葫芦）
河北省邢台市临城县东镇镇南孟村（设施蔬菜）
河北省邯郸市邱县梁二庄镇（文冠果）
山西省太原市清徐县孟封镇杨房村（食醋）
山西省朔州市怀仁市海北头乡海子村（肉羊）
山西省忻州市忻府区董村镇游邀村（红薯）
山西省吕梁市临县安业乡前青塘村（粽子）
山西省阳泉市平定县娘子关镇下董寨村（休闲旅游）
山西省晋城市阳城北留镇皇城村（休闲旅游）
山西省临汾市安泽县良马镇小李村（休闲旅游）
山西省运城市永济市开张镇东开张村（土布）
内蒙古自治区锡林郭勒盟西乌珠穆沁旗浩勒图高勒镇巴彦胡舒嘎查（草原肉羊）
内蒙古自治区兴安盟扎赉特旗好力保镇（水稻）
内蒙古自治区赤峰市宁城县小城子镇（苹果）
内蒙古自治区赤峰市宁城县一肯中乡万家营子村（尖椒）
内蒙古自治区呼和浩特市清水河县韭菜庄乡（花菇）
内蒙古自治区呼和浩特市武川县上秃亥乡（马铃薯）
内蒙古自治区阿拉善盟额济纳旗巴彦陶来苏木（蜜瓜）
内蒙古自治区阿拉善盟阿拉善左旗腾格里额里斯镇乌兰哈达嘎查（休闲旅游）
内蒙古自治区巴彦淖尔市乌拉特中旗德岭山镇四义堂村（辣椒）
内蒙古自治区通辽市科尔沁左翼中旗胜利乡谢家窑村（血麦）
辽宁省丹东市东港市椅圈镇（草莓）
辽宁省本溪市桓仁满族自治县古城镇（水稻）
辽宁省朝阳市龙城区联合镇（香菇）
辽宁省朝阳市朝阳县木头城子镇十家子村（葡萄）
辽宁省沈阳市新民市柳河沟镇解放村（西甜瓜）
辽宁省大连市长海县大长山岛镇小盐场村（海参）
辽宁省营口市盖州市榜式堡镇马连峪村（柞蚕）
辽宁省营口市盖州市双台镇松树沟村（手工刺绣）
辽宁省鞍山市千山区汤岗子镇汤岗子村（酸菜）
辽宁省阜新市彰武县双庙镇明水村（甘薯）
辽宁省锦州市义县高台子镇后药王庙村（肉牛）
吉林省延边朝鲜族自治州和龙市八家子镇（桑黄）
吉林省延边朝鲜族自治州敦化市雁鸣湖镇（休闲旅游）
吉林省辽源市东辽县安恕镇曲家村（糯玉米）
吉林省吉林市龙潭区江北乡棋盘村（雷猪）
吉林省四平市伊通满族自治县伊通镇二道村（百合）
吉林省吉林市永吉县万昌镇（水稻）
吉林省长春市双阳区鹿乡镇鹿乡村（梅花鹿）
吉林省松原市长岭县三团乡六十三村（小米）
黑龙江省绥化市青冈县祯祥镇兆林村（玉米）
黑龙江省绥化市肇东市肇东镇石坚村（食用菌）
黑龙江省绥化市肇东市昌五镇（玉米）
黑龙江省齐齐哈尔市富裕县友谊达斡尔族满族柯尔克孜族乡三家子村（水稻）
黑龙江省齐齐哈尔市富拉尔基区长青乡库勒村（休闲旅游）
黑龙江省齐齐哈尔市铁锋区扎龙镇查罕诺村（休闲旅游）
黑龙江省齐齐哈尔市泰来县克利镇（水稻）
黑龙江省大庆市肇源县新站镇（水稻）
黑龙江省大庆市肇源县民意乡建国村（水稻）
黑龙江省牡丹江市东宁市绥阳镇细岭村（黑木耳）
黑龙江省哈尔滨市松北区利业街道玉林村（苗木）
黑龙江省佳木斯市抚远市抚远镇（鲟鳇鱼）
黑龙江省佳木斯市汤原县汤原镇北靠山村（休闲旅游）
黑龙江省黑河市北安市红星农场（酸菜）
上海市奉贤区青村镇吴房村（黄桃）
上海市金山区枫泾镇中洪村（农民画）
上海市浦东新区老港镇大河村（种猪）
上海市松江区叶榭镇井凌桥村（花卉）
江苏省南京市浦口区永宁街道联合村（青虾）
江苏省南京市高淳区桠溪街道桥李村（茶叶）
江苏省无锡市锡山区东港镇山联村（休闲旅游）
江苏省无锡市宜兴市丁蜀镇西望村（紫砂）
江苏省徐州市丰县范楼镇（牛蒡）
江苏省徐州市新沂市高流镇老范村（水蜜桃）
江苏省常州市武进区嘉泽镇（苗木）
江苏省苏州市常熟市碧溪街道（蔬菜）
江苏省苏州市吴中区香山街道舟山村（核雕）
江苏省南通市海安市胡集街道周吴村（花卉苗木）
江苏省连云港市赣榆区海头镇海前村（电子商务）
江苏省连云港市东海县曲阳乡薛埠村（水晶）
江苏省淮安市金湖县银涂镇高邮湖村（鱼虾蟹）
江苏省盐城市盐都区潘黄街道新民村（草莓）
江苏省盐城市滨海县正红镇陈圩村（柳编）
江苏省扬州市高邮市三垛镇（黄羽鸡）
江苏省镇江市丹徒区世业镇（鲜食玉米）
江苏省泰州市兴化市昌荣镇盐北村（河蟹）
江苏省泰州市靖江市生祠镇利珠村（桃）
江苏省淮安市涟水县高沟镇胡窑村（瓜蒌）
浙江省杭州市富阳区里山镇安顶村（云雾茶）
浙江省杭州市余杭区鸬鸟镇（蜜梨）
浙江省湖州市长兴县水口乡顾渚村（休闲旅游）
浙江省嘉兴市平湖市林埭镇（虾）
浙江省金华市武义县新宅镇（香菇）
浙江省金华市兰溪市马涧镇下杜村（杨梅）
浙江省丽水市缙云县前路乡前路村（茭白）
浙江省宁波市慈溪市新浦镇（葡萄）
浙江省宁波市余姚市泗门镇（榨菜）
浙江省衢州市衢江区岭洋乡（茶叶）
浙江省绍兴市新昌县东茗乡下岩贝村（休闲旅游）
安徽省淮北市烈山区宋疃镇和村社区（苹果）
安徽省宿州市砀山县良梨镇良梨村（酥梨）
安徽省阜阳市阜南县郜台乡刘店村（柳编）
安徽省蚌埠市禹会区马城镇冯嘴村（休闲旅游）
安徽省滁州市南谯区施集镇井楠村（茶叶）
安徽省池州市贵池区梅村镇杨棚村（茶叶）
安徽省黄山市歙县雄村镇卖花渔村（花卉）
安徽省铜陵市义安区天门镇天门村（白姜）
安徽省合肥市巢湖市槐林镇（渔网制作）
安徽省六安市裕安区独山镇（茶叶）
安徽省马鞍山市当涂县大陇镇（河蟹）
安徽省宣城市绩溪县荆州乡（山核桃）
安徽省安庆市岳西县菖蒲镇（茶叶）
安徽省芜湖市南陵县许镇镇（鳙鱼）
福建省泉州市安溪县感德镇（铁观音）
福建省泉州市晋江市东石镇檗谷村（胡萝卜）
福建省泉州市永春县仙夹镇龙水村（漆篮）
福建省三明市沙县区夏茂镇（沙县小吃）
福建省三明市大田县桃源镇（蔬菜）
福建省龙岩市连城县姑田镇（竹文化）
福建省龙岩市新罗区适中镇（山麻鸭）
福建省龙岩市武平县中堡镇梧地村（象洞鸡）
福建省宁德市福鼎市点头镇（白茶）
福建省宁德市霞浦县柏洋乡董墩村（葡萄）
福建省莆田市仙游县书峰乡兰石村（枇杷）
福建省漳州市高新技术开发区靖城镇郑店村（食用菌）
江西省宜春市奉新县赤岸镇城下村（猕猴桃）
江西省抚州市南丰县白舍镇白舍村（瓷器）
江西省抚州市宜黄县梨溪镇里阴村（食用菌）
江西省抚州市资溪县乌石镇（白羽肉鸡）
江西省吉安市泰和县马市镇（乌鸡）
江西省吉安市遂川县大坑乡（金桔）
江西省南昌市安义县东阳镇（蓝莓）
江西省南昌市湾里管理局太平镇（民宿）
江西省赣州市崇义县上堡乡水南村（水稻）
江西省赣州市章贡区沙石镇（食用菌）
山东省济南市莱芜区牛泉镇（山楂）
山东省济南市商河县贾庄镇（花卉）
山东省青岛市平度市新河镇（草编）
山东省枣庄市山亭区城头镇（豆制品）
山东省东营市广饶县李鹊镇（小麦）
山东省烟台市栖霞市唐家泊镇肖家夼村（苹果）
山东省烟台市招远市齐山镇（蜜薯）
山东省潍坊市临朐县山旺镇（樱桃）
山东省潍坊市寿光市崔岭西村（蔬菜）
山东省济宁市金乡县马庙镇（大蒜）
山东省济宁市梁山县杨营镇（肉牛）
山东省泰安市新泰市刘杜镇（山楂）
山东省威海市乳山市海阳所镇（牡蛎）
山东省日照市东港区涛雒镇（对虾）
山东省聊城市冠县店子镇（灵芝）
山东省菏泽市曹县大集镇（电子商务）
山东省菏泽市定陶区半堤镇成海村（胡萝卜）
山东省淄博市高青县花沟镇三利村（西瓜）
山东省临沂市沂南县依汶镇（蔬菜）
山东省临沂市费县上冶镇顺合村（金蛋）
山东省德州市乐陵市花园镇（甜瓜）
山东省德州市宁津县柴胡店镇崔杨村（蟋蟀）
山东省滨州市邹平县长山镇毛张村（山药）
河南省焦作市武陟县乔庙镇（水稻）
河南省焦作市济源市坡头镇双堂村（核桃）
河南省焦作市修武县当阳峪村（绞胎瓷）
河南省安阳市殷都区都里镇（花椒）
河南省南阳市卧龙区石桥镇（月季）
河南省南阳市内乡县灌涨镇杨集村（番茄）
河南省南阳市邓州市九龙镇舟陂村（梨）
河南省郑州市荥阳市高村乡枣树沟村（石榴）
河南省郑州市荥阳市广武镇张庄村（石榴）
河南省洛阳市新安县五头镇（樱桃）
河南省洛阳市孟津区朝阳镇南石山村（唐三彩）
河南省洛阳市孟津区平乐镇平乐社区（牡丹画）
河南省鹤壁市浚县善堂镇（花生）
河南省开封市顺河回族区土柏岗乡齐寨社区（酿酒）
河南省商丘市民权县西屯村（葡萄）
河南省濮阳市南乐县元村镇古寺郎村（胡萝卜）
河南省平顶山市宝丰县大营镇清凉寺村（汝瓷）
河南省平顶山市叶县龙泉乡草场街村（食用菌）
河南省驻马店市平舆县西洋店镇西洋潭村（莲藕）
河南省驻马店市确山县赵楼村（水稻）
河南省信阳市浉河区浉河港镇（茶叶）
河南省信阳市平桥区五里店街道七桥村（蓝莓）
河南省新乡市韩董庄镇杨厂村（食用菌）
湖北省荆门市钟祥市柴湖镇马南村（娃娃菜）
湖北省孝感市大悟县三里城镇望山村（稻鸭米）
湖北省荆州市洪湖市小港管理区（小龙虾）
湖北省黄石市铁山区大王镇贵湾村（香椿）
湖北省武汉市黄陂区罗汉寺街（草莓）
湖北省天门市拖市镇何场村（马铃薯）
湖北省恩施土家族苗族自治州宣恩县李家河镇（贡水白柚）
湖北省鄂州市梁子湖区涂家垴镇张远村（蓝莓）
湖北省潜江市老新镇（虾稻）
湖北省十堰市房县土城镇（黄酒）
湖北省黄冈市蕲春县漕河镇（蕲艾）
湖北省宜昌市夷陵区邓村乡（茶叶）
湖北省咸宁市咸安区贺胜桥镇（肉鸡）
湖北省襄阳市枣阳市平林镇宋集村（油桃）
湖北省仙桃市郑场镇（富硒豆豉）
湖北省随州市广水市武胜关镇（茶叶）
湖北省神农架林区木鱼镇（茶叶）
湖北省襄阳市襄州区程河镇（柳编）
湖南省长沙市望城区白箬铺镇（休闲旅游）
湖南省衡阳市衡东县三樟镇塔冲村（黄贡椒）
湖南省衡阳市衡阳县台源镇东湖寺村（乌莲）
湖南省衡阳市蒸湘区雨母镇雨母村（鱼）
湖南省株洲市芦淞区白关镇卦石村（白关丝瓜）
湖南省湘潭市湘乡市翻江镇（壶天石羊）
湖南省岳阳市湘阴县三塘镇（藠头）
湖南省岳阳市平江县加义镇杨林街村（苹果梨）
湖南省常德市鼎城区十美堂镇（油菜）
湖南省常德市桃源县杨溪桥镇（茶叶）
湖南省张家界市武陵源区协合乡龙尾巴居委会（休闲旅游）
湖南省益阳市安化县马路镇（茶叶）
湖南省益阳市安化县田庄乡高马二溪村（茶叶）
湖南省郴州市苏仙区良田镇堆上村（食用菌）
湖南省永州市江永县粗石江镇（香柚）
湖南省怀化市沅陵县马底驿乡（茶叶）
湖南省娄底市冷水江市渣渡镇铁山村（杨梅）
湖南省湘西州龙山县洗洛镇（百合）
广东省广州市花都区梯面镇（休闲旅游）
广东省广州市从化区太平镇井岗村（荔枝）
广东省肇庆市怀集县冷坑镇（蔬菜）
广东省中山市神湾镇（菠萝）
广东省韶关市南雄市珠玑镇（水稻）
广东省梅州市梅县区石扇镇（金柚）
广东省梅州市梅江区西阳镇桃坪村（茶叶）
广东省江门市开平市马冈镇（肉鹅）
广东省江门市新会区双水镇桥美村（甘蔗）
广东省潮州市饶平县汫洲镇（大蚝）
广东省清远市阳山县七拱镇（丝苗米）
广东省湛江市徐闻县曲界镇（菠萝）
广东省茂名市滨海新区博贺镇（海洋捕捞）
广东省茂名市电白区沙琅镇谭儒村（萝卜）
广东省东莞市大岭山镇（荔枝）
广东省惠州市惠阳区镇隆镇（荔枝）
广东省河源市和平县贝墩镇（豆制品）
广东省河源市连平县高莞镇二联村（花生）
广东省云浮市云安区白石镇石底村（花卉苗木）
广东省云浮市罗定市泗纶镇杨绿村（蒸笼）
广东省汕尾市陆河县河口镇田墩村（油柑）
广东省阳江市阳西县沙扒镇渡头村（海水鱼苗）
广东省佛山市顺德区勒流街道稔海村（鳗鱼）
广东省珠海市斗门区乾务镇湾口村（鳗鱼）
广西壮族自治区南宁市宾阳县古辣镇（香米）
广西壮族自治区桂林市龙胜县龙脊镇（休闲旅游）
广西壮族自治区桂林市全州县才湾镇南一村（葡萄）
广西壮族自治区防城港市防城区扶隆镇（肉桂八角）
广西壮族自治区贺州市平桂区大平瑶族乡（腐竹）
广西壮族自治区崇左市扶绥县昌平乡（坚果）
广西壮族自治区柳州市柳江区三都镇觉山村（香葱）
广西壮族自治区柳州市融水县安太乡元宝村（水稻）
广西壮族自治区梧州市苍梧县六堡镇大中村（六堡茶）
广西壮族自治区梧州市藤县濛江镇健良村（荔枝）
广西壮族自治区北海市合浦县公馆镇香山村（荔枝）
广西壮族自治区钦州市钦南区久隆镇青草村（五指毛桃）
广西壮族自治区贵港市桂平市麻垌镇鹧鸪村（荔枝）
广西壮族自治区玉林市福绵区成均镇古城村（蛋鸡）
广西壮族自治区百色市田东县平马镇四平村（番茄）
广西壮族自治区河池市南丹县城关镇莲花村（黄腊李）
广西壮族自治区河池市宜州区德胜镇上坪村（桑蚕）
海南省东方市三家镇（鳄鱼）
海南省东方市八所镇罗带村（粽子）
海南省万宁市北大镇尖岭村（鹧鸪茶）
海南省保亭县六弓乡镇（肉鹅）
海南省琼海市大路镇湖仔村（热带树苗）
重庆市巴南区二圣镇（茶叶）
重庆市黔江区中塘镇兴泉社区（猕猴桃）
重庆市大渡口区跳磴镇石盘村（柑橘）
重庆市开州区临江镇福德村（春橙）
重庆市梁平区蟠龙镇扈槽村（水稻）
重庆市大足区高升镇（芳香植物）
重庆市垫江县砚台镇（青花椒）
重庆市奉节县安坪镇三沱村（脐橙）
重庆市荣昌区河包镇（粉条）
重庆市铜梁区平滩镇（蔬菜）
四川省自贡市富顺县狮市镇（柑橘）
四川省自贡市自流井区仲权镇（彩灯）
四川省攀枝花市盐边县永兴镇（蚕桑）
四川省泸州市江阳区通滩镇（高粱）
四川省德阳市绵竹市孝德镇年画村（年画）
四川省绵阳市安州区秀水镇（水稻）
四川省北川羌族县曲山镇石椅村（羌族歌舞）
四川省广元市苍溪县黄猫娅镇（白肉枇杷）
四川省广元市朝天区麻柳乡（麻柳刺绣）
四川省遂宁市射洪县金华镇西山坪村（生猪）
四川省内江市市中区凌家镇酒房沟村（柑橘）
四川省南充市嘉陵区双桂镇三龙场村（桑茶）
四川省宜宾市翠屏区牟坪镇龙兴村（柑橘）
四川省宜宾市高县庆岭镇（春酒）
四川省广安市前锋区虎城镇（青花椒）
四川省广安市岳池县白庙镇郑家村（休闲旅游）
四川省达州市渠县新市镇（蜂糖李）
四川省巴中市平昌县涵水镇幸福村（江口青鳙）
四川省雅安市雨城区碧峰峡镇（茶叶）
四川省眉山市洪雅县中山镇（茶叶）
四川省甘孜州理塘县禾尼乡（牦牛）
四川省凉山州会东县姜州镇郑家坝村（石榴）
四川省乐山市夹江县马村镇石堰村（手工造纸）
贵州省贵阳市息烽县石硐镇（猕猴桃）
贵州省贵阳市修文县六屯镇都堡村（猕猴桃）
贵州省遵义市凤冈县天桥镇（肉牛）
贵州省遵义市绥阳县郑场镇大楠村（韭黄）
贵州省铜仁市万山区黄道乡（香柚）
贵州省铜仁市德江县稳坪镇金庄村（花椒）
贵州省六盘水市盘州市新民镇旧屯村（红米）
贵州省安顺市普定县化处镇焦家村（韭黄）
贵州省毕节市织金县板桥镇白果村（茶叶）
贵州省毕节市黔西市化屋村（苗绣）
贵州省黔南布依族苗族自治州福泉市龙昌镇（生猪）
贵州省黔南布依族苗族自治州龙里县洗马镇羊昌村（刺梨）
贵州省黔西南布依族苗族自治州兴义市七舍镇革上村（茶叶）
贵州省黔东南苗族侗族自治州施秉县牛大场镇牛大场村（太子参）
贵州省黔东南苗族侗族自治州从江县斗里镇马安村（苗绣）
云南省丽江市华坪县石龙坝镇临江村（芒果）
云南省丽江市玉龙县白沙镇玉湖村（休闲旅游）
云南省西双版纳傣族自治州景洪市勐龙镇勐宋村（茶叶）
云南省西双版纳傣族自治州景洪市勐罕镇曼听村（休闲旅游）
云南省昭通市镇雄县碗厂镇（鲜笋）
云南省保山市昌宁县温泉镇（茶叶）
云南省普洱市镇沅县按板镇罗家村（茶叶）
云南省红河哈尼族彝族自治州弥勒市西三镇蚂蚁村（休闲旅游）
云南省文山壮族苗族自治州麻栗坡县猛硐瑶族乡（茶叶）
云南省曲靖市麒麟区越州镇大梨树村（蓝莓）
云南省玉溪市元江县甘庄街道（芒果）
云南省玉溪市澄江县右所镇吉花社区（休闲旅游）
云南省楚雄州双柏县爱尼山乡（中药材）
云南省临沧市耿马自治县勐撒镇翁达村（省藤）
云南省临沧市临翔区博尚镇碗窑村（土陶）
西藏自治区昌都市芒康县纳西民族乡（葡萄）
西藏自治区拉萨市曲水县南木乡（瓜果）
西藏自治区拉萨市堆龙德庆区柳梧新区达东村（休闲旅游）
西藏自治区拉萨市当雄县龙仁乡（牦牛）
西藏自治区拉萨市堆龙德区古荣镇加入村（花卉）
西藏自治区拉萨市堆龙德庆区东嘎街道桑木社区（罗萨梅朵）
陕西省西安市高陵区通远街道办事处何村（设施蔬菜）
陕西省西安市西咸新区秦汉新城窑店街道办事处刘家沟村（窑洞文化）
陕西省咸阳市淳化县十里塬镇十里塬村（食用菌）
陕西省铜川市宜君县彭镇西洼村（食用菌）
陕西省延安市甘泉县下寺湾镇闫家沟村（瓜菜）
陕西省汉中市略阳县黑河镇（乌鸡）
陕西省汉中市南郑区黄官镇水井村（藤竹编）
陕西省安康市石泉县后柳镇中坝村（手工作坊文化）
陕西省安康市白河县宋家镇（茶叶）
陕西省宝鸡市陇县东风镇（奶山羊）
陕西省渭南市富平县庄里镇（柿饼）
陕西省渭南市蒲城县龙阳镇（瓜果）
陕西省榆林市府谷县武家庄镇（肉羊）
陕西省商洛市丹凤县峦庄镇（中药材）
甘肃省甘南藏族自治州舟曲县博峪镇恰路诺村（中药材）
甘肃省定西市岷县茶埠镇岳家湾村（中药材）
甘肃省庆阳市宁县焦村镇（苹果）
甘肃省庆阳市环县曲子镇西沟村（紫花苜蓿）
甘肃省天水市张家川县龙山镇马河村（苹果）
甘肃省白银市景泰县草窝滩镇（西红柿）
甘肃省酒泉市玉门市下西号镇（枸杞）
甘肃省兰州市榆中县园子岔乡（百合）
甘肃省陇南市武都区马街镇（花椒）
甘肃省武威市凉州区四坝镇（蔬菜）
甘肃省武威市民勤县东湖镇（茴香）
甘肃省张掖市甘州区乌江镇（蔬菜）
甘肃省张掖市肃南县明花乡（牧草）
青海省海东市互助县东沟乡大庄村（青绣）
青海省海南州兴海县河卡镇五一村（油菜）
青海省西宁市湟中区多巴镇玉拉村（生菜）
青海省西宁市湟中区鲁沙尔镇阳坡村（金银铜器）
青海省玉树州曲麻莱县叶格乡红旗村（种牦牛）
青海省玉树州治多县治渠乡同卡村（种牦牛）
宁夏回族自治区石嘴山市惠农区庙台乡东永固村（枸杞）
宁夏回族自治区固原市泾源县大湾乡杨岭村（休闲旅游）
宁夏回族自治区吴忠市红寺堡区新庄集乡杨柳村（葡萄酒）
宁夏回族自治区银川市西夏区镇北堡镇昊苑村（葡萄酒）
新疆维吾尔自治区博州精河县托里镇（枸杞）
新疆维吾尔自治区阿克苏地区阿瓦提县三河镇（棉花）
新疆维吾尔自治区阿克苏地区温宿县托乎拉乡（大米）
新疆维吾尔自治区阿克苏地区阿瓦提县塔木托格拉克镇库吾尔尕村（甘甜瓜）
新疆维吾尔自治区和田地区和田县巴格其镇（核桃）
新疆维吾尔自治区和田地区策勒县策勒乡阿日希村（红枣）
新疆维吾尔自治区喀什地区岳普湖县岳普湖乡（无花果）
新疆维吾尔自治区喀什地区麦盖提县央塔克乡（红枣）
新疆维吾尔自治区塔城地区沙湾市乌兰乌苏镇（富硒杂粮）
新疆维吾尔自治区塔城地区乌苏市八十四户乡（蔬菜）
新疆生产建设兵团第十师北屯市188团海川镇（葵花）
新疆生产建设兵团第三师图木舒克市54团兴安镇（油莎豆）
新疆生产建设兵团第一师阿拉尔市6团双城镇（苹果）
新疆生产建设兵团第五师双河市81团园艺3连（鸵鸟）

## Sheet: 10
	列1
北京市房山区大石窝镇辛庄村（杏鲍菇）	上海市宝山区罗泾镇海星村（水产）
北京市通州区于家务回族乡果村（芹菜）	上海市浦东新区宣桥镇（蔬菜）
北京市平谷区夏各庄镇贤王庄村（红薯）	上海市金山区廊下镇勇敢村（食用菌）
北京市密云区巨各庄镇蔡家洼村（月季）	上海市奉贤区青村镇陶宅村（花卉）
天津市北辰区青光镇韩家墅村（休闲农业）	上海市崇明区港沿镇园艺村（花卉苗木）
天津市静海区王口镇（炒货）	江苏省南京市浦口区星甸街道九华村（茶叶）
天津市蓟州区出头岭镇（食用菌）	江苏省无锡市惠山区阳山镇桃源村（休闲农业）
天津市蓟州区上仓镇东塔庄村（驴肉）	江苏省无锡市宜兴市西渚镇白塔村（南天竹）
天津市蓟州区出头岭镇大安平村（鲜桃）	江苏省徐州市铜山区棠张镇（蚕桑）
天津市蓟州区出头岭镇五清庄村（休闲农业）	江苏省徐州市睢宁县邱集镇仝海村（水稻）
河北省石家庄市高邑县中韩乡岗头村（鲜桃）	江苏省徐州市新沂市阿湖镇桃岭村（葡萄）
河北省秦皇岛市青龙满族自治县七道河乡石城子村（板栗）	江苏省常州市金坛区薛埠镇（茶叶）
河北省秦皇岛市昌黎县龙家店镇（粉条）	江苏省苏州市张家港市杨舍镇善港村（葡萄）
河北省唐山市滦州市滦城街道杨家院村（花生）	江苏省南通市海安市隆政街道新丰村（蚕桑）
河北省邯郸市邱县邱城镇（红薯）	江苏省连云港市连云区高公岛街道黄窝村（紫菜）
河北省邯郸市馆陶县房寨镇（晚秋黄梨）	江苏省淮安市涟水县红窑镇（芦笋）
河北省邢台市信都区浆水镇（苹果）	江苏省盐城市盐都区大纵湖镇三官村（大闸蟹）
河北省邢台市内丘县柳林镇东石河村（酸枣仁）	江苏省盐城市滨海县滨海港经济区三港村（白首乌）
河北省邢台市南和县贾宋镇郄村（番茄）	江苏省盐城市东台市弶港镇（甜叶菊）
河北省保定市阜平县天生桥镇（食用菌）	江苏省扬州市江都区吴桥镇（水稻）
河北省保定市定兴县贤寓镇龙华村（蔬菜）	江苏省扬州市高邮市龙虬镇（罗氏沼虾）
河北省承德市宽城满族自治县碾子峪镇艾峪口村（板栗）	江苏省镇江市句容市白兔镇唐庄村（葡萄）
河北省承德市兴隆县蓝旗营镇（板栗）	江苏省镇江市句容市茅山镇永兴村（花木）
河北省沧州市南皮县大浪淀乡贾九卜村（生猪）	江苏省泰州市高港区胡庄镇宗林村（河蟹）
河北省廊坊市安次区杨税务乡孟村（甜瓜）	江苏省泰州市泰兴市姚王镇东林村（螃蟹）
河北省廊坊市安次区东沽港镇牛角村（葡萄）	江苏省宿迁市宿城区耿车镇红卫村（花木）
河北省廊坊市永清县别古庄镇后刘武营村（核雕）	江苏省宿迁市泗洪县半城镇（大闸蟹）
河北省衡水市武强县东孙庄乡（奶牛）	浙江省建德市三都镇松口村（柑橘）
河北省衡水市景县连镇乡（鸡蛋）	浙江省温州市泰顺县仕阳镇（茶叶）
河北省衡水市深州穆村乡（蜜桃）	浙江省嘉兴市南湖区凤桥镇（水果）
山西省阳泉市盂县北下庄乡后川村（香梨）	浙江省湖州市南浔区和孚镇新荻村（青鱼）
山西省长治市壶关县店上镇（西红柿）	浙江省湖州市德清县禹越镇（黑鱼）
山西省晋城市陵川县六泉乡（中药材）	浙江省嵊州市金庭镇（桃形李）
山西省晋中市寿阳县上湖乡常村（香梨）	浙江省金华市婺城区罗店镇盘前村（蔬菜）
山西省运城市芮城县阳城镇（大枣）	浙江省金华市武义县柳城畲族镇（宣莲）
山西省忻州市原平市子干乡东南贾村（酥梨）	浙江省衢州市衢江区杜泽镇坎头村（茭白）
山西省临汾市曲沃县史村镇（蔬菜）	浙江省衢州市常山县青石镇水南村（胡柚）
山西省吕梁市中阳县车鸣峪乡（黑木耳）	浙江省舟山市普陀区展茅街道（鱿鱼）
内蒙古自治区呼和浩特市清水河县宏河镇高茂泉村（杂粮）	浙江省丽水市缙云县舒洪镇仁岸村（杨梅）
内蒙古自治区乌海市海南区赛汗乌素村（葡萄）	安徽省芜湖市湾沚区六郎镇北陶村（休闲农业）
内蒙古自治区赤峰市克什克腾旗宇宙地镇（中药材）	安徽省蚌埠市五河县沱湖乡大岗村（稻虾连作）
内蒙古自治区赤峰市宁城县大城子镇瓦南村（番茄）	安徽省淮南市大通区九龙岗镇方岗村（食用菌）
内蒙古自治区鄂尔多斯市乌审旗嘎鲁图镇（细毛羊）	安徽省马鞍山市当涂县塘南镇（河蟹）
内蒙古自治区鄂尔多斯市伊金霍洛旗红庆河镇哈达图淖尔村（生猪）	安徽省淮北市杜集区段园镇（葡萄）
内蒙古自治区呼伦贝尔市牙克石市免渡河镇（马铃薯）	安徽省铜陵市枞阳县雨坛镇新塘村（白茶）
内蒙古自治区巴彦淖尔市乌拉特前旗大佘太镇三份子村（辣椒）	安徽省安庆市怀宁县黄墩镇（蓝莓）
内蒙古自治区巴彦淖尔市乌拉特中旗乌加河镇联丰奋斗村（有机小麦）	安徽省黄山市祁门县柏溪乡（茶叶）
内蒙古自治区兴安盟科尔沁右翼中旗巴彦呼舒镇哈日道卜嘎查村（大米）	安徽省滁州市明光市管店镇小魏村（甜叶菊）
辽宁省沈阳市苏家屯区八一镇红菱街道来胜堡村（棚菜）	安徽省阜阳市颍上县耿棚镇耿棚社区（蚕桑）
辽宁省大连市金普新区七顶山街道老虎山村（樱桃）	安徽省六安市裕安区固镇镇（白鹅）
辽宁省丹东市振安区同兴镇变电村（杜鹃花）	安徽省亳州市谯城区张店乡黄楼村（果树）
辽宁省营口市鲅鱼圈区红旗镇（葡萄）	安徽省池州市东至县木塔乡梓桐村（茶叶）
辽宁省营口市盖州市太阳升街道黄大寨村（西瓜）	安徽省宣城市宁国市南极乡（山核桃）
辽宁省营口市盖州市徐屯镇龙湾村（生姜）
辽宁省盘锦市盘山县甜水镇（大米）
辽宁省朝阳市朝阳县胜利镇大嘎海图村（小米）
辽宁省朝阳市凌源市四官营子镇大房身村（黄瓜）
辽宁省葫芦岛市兴城市曹庄镇（多宝鱼）
辽宁省葫芦岛市兴城市三道沟满族乡三道沟里村（苹果）
吉林省长春市双阳区奢岭镇（草莓）
吉林省吉林市丰满区江南乡孟家村（休闲农业）
吉林省吉林市磐石市取柴河镇（食用菌）
吉林省四平市伊通满族自治县伊通镇前范村（水稻）
吉林省通化市梅河口市海龙镇春明村（蔬菜）
吉林省白山市浑江区三道沟镇（北五味子）
吉林省白山市靖宇县三道湖镇（蓝莓）
吉林省白城市大安市舍力镇民富村（水稻）
黑龙江省哈尔滨市宾县宾州镇二龙山村（休闲农业）
黑龙江省哈尔滨市巴彦县兴隆镇中兴村（玉米）
黑龙江省哈尔滨市五常市杜家镇七一村（水稻）
黑龙江省齐齐哈尔市依安县红星乡东升村（中草药）
黑龙江省齐齐哈尔市泰来县大兴镇时雨村（中草药）
黑龙江省齐齐哈尔市富裕县龙安桥镇小河东村（芦苇编织）
黑龙江省双鸭山市集贤县升昌镇永胜村（鲜食玉米）
黑龙江省双鸭山市宝清县宝清镇亨利村（蔬菜）
黑龙江省大庆市肇州县新福乡（甜瓜）
黑龙江省七台河市新兴区红旗镇红胜村（蔬菜）
黑龙江省牡丹江市西安区海南朝鲜族乡中兴村（优质米）
黑龙江省牡丹江市穆棱市下城子镇（蔬菜）
黑龙江省绥化市北林区东富镇太阳升村（马铃薯）
黑龙江省绥化市庆安县平安镇（水稻）
上海市宝山区罗泾镇海星村（水产）	上海市宝山区罗泾镇海星村（水产）
上海市浦东新区宣桥镇（蔬菜）	上海市浦东新区宣桥镇（蔬菜）
上海市金山区廊下镇勇敢村（食用菌）	上海市金山区廊下镇勇敢村（食用菌）
上海市奉贤区青村镇陶宅村（花卉）	上海市奉贤区青村镇陶宅村（花卉）
上海市崇明区港沿镇园艺村（花卉苗木）	上海市崇明区港沿镇园艺村（花卉苗木）
江苏省南京市浦口区星甸街道九华村（茶叶）	江苏省南京市浦口区星甸街道九华村（茶叶）
江苏省无锡市惠山区阳山镇桃源村（休闲农业）	江苏省无锡市惠山区阳山镇桃源村（休闲农业）
江苏省无锡市宜兴市西渚镇白塔村（南天竹）	江苏省无锡市宜兴市西渚镇白塔村（南天竹）
江苏省徐州市铜山区棠张镇（蚕桑）	江苏省徐州市铜山区棠张镇（蚕桑）
江苏省徐州市睢宁县邱集镇仝海村（水稻）	江苏省徐州市睢宁县邱集镇仝海村（水稻）
江苏省徐州市新沂市阿湖镇桃岭村（葡萄）	江苏省徐州市新沂市阿湖镇桃岭村（葡萄）
江苏省常州市金坛区薛埠镇（茶叶）	江苏省常州市金坛区薛埠镇（茶叶）
江苏省苏州市张家港市杨舍镇善港村（葡萄）	江苏省苏州市张家港市杨舍镇善港村（葡萄）
江苏省南通市海安市隆政街道新丰村（蚕桑）	江苏省南通市海安市隆政街道新丰村（蚕桑）
江苏省连云港市连云区高公岛街道黄窝村（紫菜）	江苏省连云港市连云区高公岛街道黄窝村（紫菜）
江苏省淮安市涟水县红窑镇（芦笋）	江苏省淮安市涟水县红窑镇（芦笋）
江苏省盐城市盐都区大纵湖镇三官村（大闸蟹）	江苏省盐城市盐都区大纵湖镇三官村（大闸蟹）
江苏省盐城市滨海县滨海港经济区三港村（白首乌）	江苏省盐城市滨海县滨海港经济区三港村（白首乌）
江苏省盐城市东台市弶港镇（甜叶菊）	江苏省盐城市东台市弶港镇（甜叶菊）
江苏省扬州市江都区吴桥镇（水稻）	江苏省扬州市江都区吴桥镇（水稻）
江苏省扬州市高邮市龙虬镇（罗氏沼虾）	江苏省扬州市高邮市龙虬镇（罗氏沼虾）
江苏省镇江市句容市白兔镇唐庄村（葡萄）	江苏省镇江市句容市白兔镇唐庄村（葡萄）
江苏省镇江市句容市茅山镇永兴村（花木）	江苏省镇江市句容市茅山镇永兴村（花木）
江苏省泰州市高港区胡庄镇宗林村（河蟹）	江苏省泰州市高港区胡庄镇宗林村（河蟹）
江苏省泰州市泰兴市姚王镇东林村（螃蟹）	江苏省泰州市泰兴市姚王镇东林村（螃蟹）
江苏省宿迁市宿城区耿车镇红卫村（花木）	江苏省宿迁市宿城区耿车镇红卫村（花木）
江苏省宿迁市泗洪县半城镇（大闸蟹）	江苏省宿迁市泗洪县半城镇（大闸蟹）
浙江省建德市三都镇松口村（柑橘）	浙江省建德市三都镇松口村（柑橘）
浙江省温州市泰顺县仕阳镇（茶叶）	浙江省温州市泰顺县仕阳镇（茶叶）
浙江省嘉兴市南湖区凤桥镇（水果）	浙江省嘉兴市南湖区凤桥镇（水果）
浙江省湖州市南浔区和孚镇新荻村（青鱼）	浙江省湖州市南浔区和孚镇新荻村（青鱼）
浙江省湖州市德清县禹越镇（黑鱼）	浙江省湖州市德清县禹越镇（黑鱼）
浙江省嵊州市金庭镇（桃形李）	浙江省嵊州市金庭镇（桃形李）
浙江省金华市婺城区罗店镇盘前村（蔬菜）	浙江省金华市婺城区罗店镇盘前村（蔬菜）
浙江省金华市武义县柳城畲族镇（宣莲）	浙江省金华市武义县柳城畲族镇（宣莲）
浙江省衢州市衢江区杜泽镇坎头村（茭白）	浙江省衢州市衢江区杜泽镇坎头村（茭白）
浙江省衢州市常山县青石镇水南村（胡柚）	浙江省衢州市常山县青石镇水南村（胡柚）
浙江省舟山市普陀区展茅街道（鱿鱼）	浙江省舟山市普陀区展茅街道（鱿鱼）
浙江省丽水市缙云县舒洪镇仁岸村（杨梅）	浙江省丽水市缙云县舒洪镇仁岸村（杨梅）
安徽省芜湖市湾沚区六郎镇北陶村（休闲农业）	安徽省芜湖市湾沚区六郎镇北陶村（休闲农业）
安徽省蚌埠市五河县沱湖乡大岗村（稻虾连作）	安徽省蚌埠市五河县沱湖乡大岗村（稻虾连作）
安徽省淮南市大通区九龙岗镇方岗村（食用菌）	安徽省淮南市大通区九龙岗镇方岗村（食用菌）
安徽省马鞍山市当涂县塘南镇（河蟹）	安徽省马鞍山市当涂县塘南镇（河蟹）
安徽省淮北市杜集区段园镇（葡萄）	安徽省淮北市杜集区段园镇（葡萄）
安徽省铜陵市枞阳县雨坛镇新塘村（白茶）	安徽省铜陵市枞阳县雨坛镇新塘村（白茶）
安徽省安庆市怀宁县黄墩镇（蓝莓）	安徽省安庆市怀宁县黄墩镇（蓝莓）
安徽省黄山市祁门县柏溪乡（茶叶）	安徽省黄山市祁门县柏溪乡（茶叶）
安徽省滁州市明光市管店镇小魏村（甜叶菊）	安徽省滁州市明光市管店镇小魏村（甜叶菊）
安徽省阜阳市颍上县耿棚镇耿棚社区（蚕桑）	安徽省阜阳市颍上县耿棚镇耿棚社区（蚕桑）
安徽省六安市裕安区固镇镇（白鹅）	安徽省六安市裕安区固镇镇（白鹅）
安徽省亳州市谯城区张店乡黄楼村（果树）	安徽省亳州市谯城区张店乡黄楼村（果树）
安徽省池州市东至县木塔乡梓桐村（茶叶）	安徽省池州市东至县木塔乡梓桐村（茶叶）
安徽省宣城市宁国市南极乡（山核桃）	安徽省宣城市宁国市南极乡（山核桃）
福建省泉州市安溪县尚卿乡（藤铁工艺品）
福建省泉州市永春县岵山镇（水果）
福建省泉州市永春县湖洋镇（芦柑）
福建省泉州市晋江市金井镇南江村（鲍鱼）
福建省南平市邵武市拿口镇庄上村（肉牛）
福建省南平市武夷山市星村镇（茶叶）
福建省宁德市福安市赛岐镇象环村（葡萄）
福建省龙岩市新罗区小池镇培斜村（竹制品）
福建省龙岩市长汀县河田镇（河田鸡）
福建省龙岩市上杭县湖洋镇文光村（脐橙）
福建省龙岩市武平县桃溪镇（绿茶）
福建省龙岩市连城县四堡镇（芙蓉李）
福建省龙岩市漳平市南洋镇梧溪村（水仙茶）
福建省宁德市蕉城区虎贝镇黄家村（竹制蒸笼）
江西省南昌市安义县新民乡（果业）
江西省南昌市进贤县三里乡（黄鳝）
江西省景德镇市浮梁县鹅湖镇界田村（茶叶）
江西省萍乡市莲花县湖上乡南村村（百合）
江西省九江市湖口县流芳乡（大豆）
江西省新余市分宜县凤阳镇沔村村（蔬菜）
江西省鹰潭市余江区春涛镇高坊村（铁皮石斛）
江西省赣州市全南县龙源坝镇雅溪村（休闲旅游）
江西省吉安市万安县高陂镇（蜜柚）
江西省宜春市靖安县罗湾乡哨前村（休闲旅游）
江西省抚州市南丰县市山镇包坊村（蜜桔）
山东省济南市莱芜区大王庄镇（生姜）
山东省济南市商河县玉皇庙镇（番茄）
山东省青岛市黄岛区宝山镇（蓝莓）
山东省淄博市沂源县东里镇福禄坪村（金黄金桃）
山东省枣庄市峄城区阴平镇（红枣）
山东省东营市利津县盐窝镇（肉羊）
山东省烟台市莱阳市照旺庄镇（梨）
山东省烟台市海阳市朱吴镇（樱桃）
山东省潍坊市寒亭区固堤街道（西瓜）
山东省潍坊市临朐县城关街道衡里炉村（樱桃）
山东省济宁市微山县留庄镇（荷叶）
山东省济宁市金乡县胡集镇灵显庙村（白梨瓜）
山东省泰安市岱岳区下港镇（板栗）
山东省泰安市肥城市王庄镇（马铃薯）
山东省日照市东港区后村镇（绿茶）
山东省临沂市费县东蒙镇（山楂）
山东省临沂市莒南县大店镇（草莓）
山东省德州市乐陵市黄夹镇（马铃薯）
山东省聊城市阳谷县高庙王镇（辣椒）
山东省滨州市滨城区杨柳雪镇西辛庄村（黄瓜）
山东省菏泽市曹县邵庄镇（油菜）
山东省菏泽市鄄城县彭楼镇（中药材）
河南省郑州市二七区侯寨街道樱桃沟社区（樱桃）
河南省郑州市巩义市鲁庄镇小相村（菊花）
河南省开封市杞县苏木乡（大蒜）
河南省开封市通许县冯庄乡陈庄村（蔬菜）
河南省开封市兰考县葡萄架乡杜寨村（蜜瓜）
河南省洛阳市汝阳县柏树乡（红薯）
河南省平顶山市宝丰县李庄乡翟东村（米醋）
河南省平顶山市舞钢市庙街乡人头山村（白茶）
河南省平顶山市汝州市纸坊镇中王村（鸡蛋）
河南省安阳市内黄县城关镇李小汪村（花生）
河南省安阳市林州市横水镇新庄村（红薯粉条）
河南省新乡市获嘉县史庄镇（花木）
河南省新乡市延津县王楼镇申湾村（水果）
河南省三门峡市渑池县南村乡（花椒）
河南省南阳市南召县乔端镇（香菇）
河南省南阳市方城县博望镇前荒村（黄金梨）
河南省南阳市镇平县侯集镇（观赏鱼）
河南省南阳市桐柏县程湾镇（茶叶）
河南省商丘市夏邑县罗庄镇孙王庄村（高粱）
河南省信阳市光山县凉亭乡毕店村（茶叶）
河南省信阳市固始县武庙集镇长江河村（茶叶）
河南省驻马店市确山县竹沟镇竹沟村（手工木制品）
河南省驻马店市新蔡县孙召镇大马庄村（蔬菜）
河南省驻马店市新蔡县关津乡牛湾村（水稻）
湖北省武汉市江夏区长江村（蔬菜）
湖北省黄石市大冶市刘仁八镇金柯村（辣椒）
湖北省十堰市郧阳区杨溪铺镇（香菇）
湖北省十堰市竹溪县汇湾镇（茶叶）
湖北省宜昌市长阳县火烧坪乡（蔬菜）
湖北省宜昌市五峰县长乐坪镇（中药材）
湖北省宜昌市枝江市百里洲镇三洲村（砂梨）
湖北省襄阳市谷城县紫金镇花园村（茶叶）
湖北省鄂州市鄂城区杜山镇（武昌鱼）
湖北省荆门市钟祥市洋梓镇大桥村（红豆杉）
湖北省孝感市汉川市杨林沟镇（芋头）
湖北省荆州市松滋市街河市镇（生猪）
湖北省黄冈市红安县华家河镇（茶叶）
湖北省黄冈市黄州区堵城镇王岭村（蔬菜）
湖北省黄冈市罗田县九资河镇（中药材）
湖北省咸宁市崇阳县桂花泉镇桂花村（雷竹笋）
湖北省恩施州恩施市白杨坪镇洞下槽村（茶叶）
湖北省恩施州宣恩县晓关乡（茶叶）
湖北省潜江市竹根滩镇群联村（中药材）
湖南省株洲市炎陵县中村瑶乡平乐村（黄桃）
湖南省株洲市渌口区龙船镇河包村（黄辣椒）
湖南省湘潭市湘潭县锦石乡碧泉村（水稻）
湖南省衡阳市衡东县霞流镇李花村（禽蛋）
湖南省衡阳市衡山县永和乡龙凤村（沃柑）
湖南省岳阳市岳阳县杨林街镇（肉鸽）
湖南省常德市鼎城区十美堂镇同兴村（甲鱼）
湖南省常德市临澧县刻木山乡岩龙村（脐橙）
湖南省张家界市慈利县三合镇（茶叶）
湖南省益阳市大通湖管理区千山红镇（稻虾）
湖南省益阳市南县三仙湖镇（稻虾）
湖南省郴州市苏仙区栖凤渡镇瓦灶村（鱼粉）
湖南省永州市零陵区南津渡街道香零山村（蔬菜）
湖南省永州市双牌县上梧江瑶族乡（生姜）
湖南省怀化市麻阳苗族自治县高村镇（冰糖橙）
湖南省怀化市溆浦县大江口镇（柑桔）
湖南省娄底市冷水江市三尖镇光明村（黄桃）
湖南省湘西州永顺县小溪镇（柑橘）
湖南省湘西州永顺县毛坝乡（莓茶）
广东省广州市增城区正果镇（荔枝）
广东省广州市从化区鳌头镇务丰村（蛋鸡）
广东省广州市花都区赤坭镇瑞岭村（盆景苗木）
广东省韶关市乳源县大桥镇（油茶）
广东省佛山市三水区西南街道青岐村（水产）
广东省江门市新会区大鳌镇（对虾）
广东省湛江市徐闻县曲界镇愚公楼村（菠萝）
广东省茂名市茂南区公馆镇（罗非鱼）
广东省肇庆市广宁县潭布镇（番薯）
广东省肇庆市四会市黄田镇燕崀村（柑桔）
广东省惠州市博罗县石坝镇乌坭湖村（三黄胡须鸡）
广东省梅州市兴宁市龙田镇（肉鸽）
广东省梅州市平远县长田镇官仁村（油茶）
广东省汕尾市海丰县城东镇北平村（蔬菜）
广东省汕尾市海丰县赤坑镇岗头村（荔枝）
广东省河源市东源县上莞镇仙湖村（茶叶）
广东省河源市龙川县义都镇桂林村（茶叶）
广东省阳江市阳西县儒洞镇（荔枝）
广东省阳江市阳东区塘坪镇北甘村（荔枝）
广东省清远市阳山县七拱镇西连村（淮山）
广东省清远市英德市西牛镇（麻竹笋）
广东省中山市东升镇（脆肉鲩）
广东省中山市黄圃镇（腊味）
广东省揭阳市揭东区玉湖镇坪上村（炒茶）
广东省云浮市新兴县太平镇（茶叶）
广东省云浮市云城区前锋镇（花卉）
广西壮族自治区南宁市武鸣区双桥镇（沃柑）
广西壮族自治区桂林市灵川县三街镇龙坪村（红薯）
广西壮族自治区桂林市荔浦市东昌镇安静村（三华李）
广西壮族自治区梧州市藤县太平镇（米饼）
广西壮族自治区北海市合浦县石湾镇东江村（豇豆）
广西壮族自治区北海市银海区侨港镇（海产品）
广西壮族自治区防城港市防城区江山镇（渔业）
广西壮族自治区钦州市灵山县武利镇（水果苗木）
广西壮族自治区钦州市浦北县北通镇那新村（有机茶）
广西壮族自治区贵港市港南区木格镇护录村（白玉蔗）
广西壮族自治区贵港市桂平县罗秀镇良石村（肉桂）
广西壮族自治区玉林市兴业县大平山镇陈村（三黄鸡）
广西壮族自治区百色市田阳区头塘镇联坡村（芒果）
广西壮族自治区贺州市平桂区羊头镇（生猪）
广西壮族自治区来宾市兴宾区凤凰镇牛角村（甘蔗）
广西壮族自治区崇左市扶绥县东门镇六头村（姑辽茶）
海南省海口市秀英区石山镇施茶村（火山石斛）
海南省文昌市抱罗镇抱功村（文昌鸡）
海南省澄迈县加乐镇长岭村委会效古村（沉香）
海南省澄迈县福山镇敦茶村委会洋道村（石榴）
海南省陵水县光坡镇武山村（圣女果）
重庆市万州区龙驹镇梧桐村（芦花鸡）
重庆市涪陵区百胜镇红花村（红肉蜜柚）
重庆市沙坪坝区中梁镇新发村（花卉）
重庆市北碚区静观镇素心村（花木）
重庆市长寿区龙河镇保合村（柑橘）
重庆市合川区太和镇亭子村（黄桃）
重庆市南川区三泉镇窑湾村（水稻）
重庆市璧山区丁家街道莲花坝村（花卉苗木）
重庆市铜梁区太平镇坪漆村（香桃）
重庆市武隆区平桥镇（苕粉）
重庆市丰都县湛普镇白水社区（花椒）
重庆市垫江县杠家镇（晚柚）
重庆市忠县马灌镇（笋竹）
重庆市奉节县龙桥乡九通村（中药材）
重庆市巫山县红椿土家族乡红椿村（党参）
重庆市石柱土家族自治县悦崃镇绿桃村（脆红李）
重庆市秀山土家族苗族自治县隘口镇坝芒村（山银花）
四川省成都市金堂县竹篙镇（食用菌）
四川省成都市青白江区福洪镇三元村（油桃）
四川省自贡市大安区何市镇（肉鸡）
四川省自贡市沿滩区九洪乡（花椒）
四川省攀枝花市米易县白马镇黄草回族村（樱桃）
四川省攀枝花市盐边县桐子林镇金河村（芒果）
四川省泸州市古蔺县东新镇（猕猴桃）
四川省绵阳市盐亭县巨龙镇天水村（柑橘）
四川省绵阳市梓潼县黎雅镇（水稻）
四川省广元市利州区白朝乡徐家村（食用菌）
四川省遂宁市船山区唐家乡渔舟村（川白芷）
四川省乐山市沙湾区太平镇（中药材）
四川省南充市南部县东坝镇打鼓山村（柑橘）
四川省南充市阆中市五马镇游柿垭村（川明参）
四川省眉山市东坡区三苏镇鸭池村（柑橘）
四川省宜宾市江安县阳春镇姜庙社区村（李子）
四川省宜宾市高县胜天镇安和村（李子）
四川省广安市武胜县猛山乡万民村（蚕桑）
四川省广安市邻水县柑子镇菜垭村（葡萄）
四川省达州市通川区磐石镇新店村（草莓）
四川省雅安市汉源县清溪镇（樱桃）
四川省雅安市天全县仁义镇禾林村（山药）
四川省巴中市平昌县土兴镇铁城村（花椒）
四川省资阳市乐至县高寺镇清水村（葡萄）
四川省凉山彝族自治州金阳县红联乡尖顶村（花椒）
贵州省六盘水市盘州市羊场乡张家寨村（石榴）
贵州省遵义市新蒲新区永乐镇山堡村（辣椒）
贵州省安顺市镇宁布依族苗族自治县六马镇（李子）
贵州省安顺市关岭布依族苗族自治县新铺镇岭丰村（牛）
贵州省安顺市紫云布依族苗族自治县白石乡（红薯）
贵州省毕节市大方县理化乡法乐村（辣椒）
贵州省铜仁市碧江区滑石乡白水村（香菇）
贵州省铜仁市思南县三道水乡周寨村（红薯）
贵州省铜仁市德江县高山镇阡丰村（天麻）
贵州省黔西南布依族苗族自治州仓更镇老王坡村（板栗）
贵州省黔东南苗族侗族自治州岑巩县龙田镇都素村（蛋鸡）
贵州省黔东南苗族侗族自治州雷山县望丰乡望丰村（茶叶）
贵州省黔南布依族苗族自治州独山县基长镇（桑蚕）
贵州省黔南布依族苗族自治州长顺县广顺镇（苹果）
贵州省黔南布依族苗族自治州惠水县好花红镇（佛手瓜）
云南省曲靖市陆良县马街镇马街社区（蔬菜）
云南省曲靖市陆良县龙海乡雨古村（云南参）
云南省玉溪市澄江县龙街街道左所社区（蓝莓）
云南省玉溪市元江哈尼族彝族傣族自治县甘庄街道甘庄社区（芒果）
云南省保山市腾冲市曲石镇公平社区（银杏）
云南省昭通市昭阳区苏家院镇迤那村（苹果）
云南省昭通市绥江县新滩镇（半边红李）
云南省丽江市华坪县荣将镇哲理村（芒果）
云南省丽江市华坪县石龙坝镇民主村（芒果）
云南省临沧市双江拉祜族佤族布朗族傣族自治县勐库镇冰岛村（茶叶）
云南省楚雄彝族自治州双柏县鄂嘉镇密架村（密架山猪）
云南省红河哈尼族彝族自治州石屏县大桥乡（火龙果）
云南省西双版纳傣族自治州勐海县勐混镇贺开村（茶叶）
云南省西双版纳傣族自治州勐海县格朗和乡帕沙村（茶叶）
云南省大理白族自治州永平县厂街彝族乡（泡核桃）
云南省怒江傈僳族自治州泸水市老窝镇银坡村（重楼）
云南省怒江傈僳族自治州福贡县上帕镇达普洛村（茶叶）
云南省怒江傈僳族自治州福贡县马吉乡（草果）
西藏自治区日喀则市江孜县车仁乡玉西村（藏香）
西藏自治区日喀则市亚东县下司马社区（鲑鱼）
西藏自治区山南市桑日县桑日镇塔木村（葡萄）
西藏自治区山南市加查县冷达乡共康村（核桃）
西藏自治区那曲市聂荣县尼玛乡铜龙村（休闲农业）
陕西省西安市长安区五台街道石砭峪新村（食用菌）
陕西省铜川市耀州区石柱镇西古村（苹果）
陕西省宝鸡市扶风县绛帐镇西渠村（猕猴桃）
陕西省杨凌示范区杨陵区揉谷镇（葡萄）
陕西省咸阳市彬州市北极镇（苹果）
陕西省渭南市大荔县范家镇（冬枣）
陕西省渭南市合阳县甘井镇（苹果）
陕西省渭南市韩城市芝阳镇（花椒）
陕西省延安市黄龙县白马滩镇（核桃）
陕西省汉中市西乡县堰口镇三合村（茶叶）
陕西省榆林市榆阳区孟家湾乡（水产）
陕西省榆林市子洲县老君殿镇张家渠村（绒山羊）
陕西省安康市平利县老县镇蒋家坪村（茶叶）
陕西省商洛市山阳县法官镇（茶叶）
甘肃省兰州市西固区西柳沟街道张家大坪村（韭黄）
甘肃省兰州市永登县武胜驿镇（高原夏菜）
甘肃省金昌市永昌县朱王堡镇陈仓村（高原夏菜）
甘肃省白银市靖远县东湾镇三合村（设施蔬菜）
甘肃省天水市清水县郭川镇宋川村（苹果）
甘肃省武威市天祝藏族自治县打柴沟镇（高原夏菜）
甘肃省张掖市肃南裕固族自治县明花乡前滩村（牧草）
甘肃省平凉市庄浪县阳川镇孙王村（苹果）
甘肃省酒泉市玉门市花海镇金湾村（蜜瓜）
甘肃省定西市岷县梅川镇（中药材）
甘肃省陇南市武都区裕河镇坟坪子村（茶叶）
甘肃省陇南市宕昌县庞家乡拉路村（中药材）
甘肃省临夏回族自治州永靖县关山乡徐家湾村（百合）
青海省西宁市城北区大堡子镇宋家寨村（百合花）
青海省西宁市大通回族土族自治县城关镇阳坡庄村（枸杞叶茶）
青海省西宁市湟中县上五庄镇拉目台村（大黄）
青海省海东市民和回族土族自治县官亭镇别落村（黄芪）
青海省海东市循化撒拉族自治县查汗都斯乡下庄村（花椒）
青海省海南藏族自治州兴海县河卡镇灯塔村（青稞）
宁夏回族自治区石嘴山市惠农区燕子墩乡简泉村（设施瓜菜）
宁夏回族自治区石嘴山市平罗县红崖子乡（奶牛）
宁夏回族自治区吴忠市盐池县花马池镇皖记沟村（滩羊）
宁夏回族自治区固原市原州区头营镇杨郎村（西甜瓜）
新疆维吾尔自治区哈密市伊州区沁城乡小堡村（肉羊）
新疆维吾尔自治区哈密市伊州区花园乡卡日塔里村（哈密瓜）
新疆维吾尔自治区昌吉回族自治州奇台县西北湾镇小屯村（四平头辣椒）
新疆维吾尔自治区巴音郭楞蒙古自治州焉耆回族自治县七个星镇（酿酒葡萄）
新疆维吾尔自治区阿克苏地区温宿县柯柯牙镇核桃新村（特色林果）
新疆维吾尔自治区阿克苏地区拜城县黑英山乡（油鸡）
新疆维吾尔自治区克孜勒苏柯尔克孜自治州阿图什市松他克乡松他克村（葡萄）
新疆维吾尔自治区和田地区和田县塔瓦库勒乡（辣椒）
新疆维吾尔自治区塔城地区额敏县霍吉尔特蒙古民族乡阔克萨依村（玉米）
新疆维吾尔自治区塔城地区和布克赛尔蒙古自治县查和特乡（棉花）
新疆维吾尔自治区伊犁哈萨克自治州霍城县惠远镇新城村（蔬菜）
新疆维吾尔自治区阿勒泰地区哈巴河县铁热克提乡白哈巴村（休闲农业）
新疆生产建设兵团第三师48团（红枣）
新疆生产建设兵团第五师81团（葡萄）
新疆生产建设兵团第十师188团1连（葫芦瓜）
新疆生产建设兵团第十四师昆玉市皮山农场昆泉镇（红枣）

## Sheet: 9
第九批全国“一村一品”示范村镇名单
北京市昌平区崔村镇八家村（崔村红苹果）
北京市平谷区峪口镇西营村（甜那溪有机大桃）
北京市延庆区永宁镇新华营村（鲜切菊花）
北京市大兴区安定镇前野厂村（安定桑葚）
北京市怀柔区九渡河镇黄花镇村（黄花镇蓝莓）
北京市怀柔区怀北镇河防口村（河防口红肖梨）
北京市顺义区北小营前鲁各庄村（张堪水稻）
北京市延庆区刘斌堡乡下虎叫村（民宿）
北京市昌平区十三陵镇仙人洞村（民宿）
天津市北辰区西堤头镇赵庄子村（现代都市渔业园）
天津市武清区石各庄镇敖东村（金果梨）
天津市宁河区东棘坨镇小从村（水稻）
河北省承德市滦平县大屯镇（食用菌）
河北省承德市围场满族蒙古族自治县新拨镇二道河子村（胡萝卜）
河北省秦皇岛市青龙满族自治县土门子镇丰果村（苹果）
河北省秦皇岛市昌黎县新集镇小营村（黄瓜）
河北省秦皇岛市昌黎县荒佃庄镇（皮毛）
河北省唐山市遵化市西留村乡朱山庄村（蒜黄）
河北省邯郸市邱县新马头镇礼村（邱县蜜桃）
河北省邯郸市曲周县安寨镇前衙村（葡萄）
河北省邢台市隆尧县山口镇东尚村（隆尧鸡腿葱）
河北省邢台市威县第什营镇西梨园村（葡萄）
河北省张家口市怀安县怀安城镇黄家窑村（蔬菜）
河北省张家口市张北县二台镇金家村（马铃薯）
河北省石家庄市新乐市邯邰镇小流村（新乐西瓜）
河北省石家庄市赵县范庄镇大安一村（梨果）
河北省保定市定州市东留春乡北邵村（黑小麦）
河北省保定市顺平县台鱼乡南台鱼村（林果）
河北省保定市阜平县平阳镇白家峪村（香菇）
河北省沧州市吴桥县曹洼乡岳庄村（玉米谷子）
河北省沧州市黄骅市滕庄子乡孔店村（冬枣）
河北省廊坊市大城县臧屯镇九间房村（葫芦）
河北省衡水市阜城县霞口镇刘老人村（梨果）
河北省石家庄市辛集市旧城镇（果蔬）
山西省运城市临猗县庙上乡（冬枣）
山西省吕梁市文水县胡兰镇保贤村（肉牛）
山西省阳泉市平定县巨城镇半沟村（红薯）
山西省长治市壶关县店上镇绍良村（旱地西红柿）
山西省大同市阳高县罗文皂镇管家堡村（粽子）
山西省忻州市代县胡峪乡望台村（白水杏）
山西省晋中市和顺县横岭镇翟家庄村（肉牛）
山西省临汾市乡宁县枣岭乡湾里村（花椒）
山西省晋城市沁水县土沃乡南阳村（农业观光、康养旅游）
内蒙古自治区呼伦贝尔市海拉尔区哈克镇（牛奶）
内蒙古自治区鄂尔多斯市乌审旗乌兰陶勒盖镇（生猪）
内蒙古自治区鄂尔多斯市鄂托克旗阿尔巴斯苏木（阿尔巴斯白绒山羊）
内蒙古自治区通辽市奈曼旗青龙山镇互利村（甘薯）
内蒙古自治区巴彦淖尔市杭锦后旗三道桥镇和平村（西甜瓜）
内蒙古自治区兴安盟乌兰浩特市义勒力特镇（水稻）
内蒙古自治区兴安盟扎赉特旗好力保镇水田村（水稻）
内蒙古自治区兴安盟科尔沁右翼前旗乌兰毛都苏木草根台嘎查（肉羊）
内蒙古自治区呼伦贝尔市扎兰屯市南木鄂伦春民族乡大兴村（甜玉米、鲜食玉米）
内蒙古自治区巴彦淖尔市乌拉特中旗德岭山镇苏独仑嘎查（花生）
辽宁省葫芦岛市建昌县养马甸子乡（香菇）
辽宁省沈阳市新民市大民屯镇（设施蔬菜）
辽宁省本溪市桓仁县二棚甸子镇（野山参）
辽宁省丹东市东港市北井子镇獐岛村（休闲农业）
辽宁省丹东市东港市椅圈镇李家店村（草莓）
辽宁省大连市金普新区七顶山街道拉树山村（大樱桃）
辽宁省朝阳市北票市蒙古营镇跃进村（设施蔬菜）
辽宁省铁岭市昌图县朝阳镇前柏林子村（蛋鸡）
辽宁省朝阳市凌源市东城街道房申村（花卉）
辽宁省大连市庄河市石城乡花山村（生蚝）
吉林省延边朝鲜族自治州龙井市东盛涌镇太平村（有机大米）
吉林省延边朝鲜族自治州图们市石岘镇河北村（食用菌）
吉林省四平市双辽市新立乡公平村（水稻）
吉林省吉林市永吉县万昌镇新立村（水稻）
吉林省白山市临江市闹枝镇闹枝村（黑木耳）
吉林省辽源市西安区灯塔镇富强村（蒲公英）
吉林省长春市榆树市保寿镇红旗村（有机大米）
吉林省白城市洮南市呼和车力蒙古族乡车力村（绿豆）
吉林省松原市宁江区大洼镇民乐村（瓜菜）
吉林省通化市集安市清河镇（人参）
黑龙江省哈尔滨市阿城区亚沟街道（粘豆包）
黑龙江省牡丹江市林口县古城镇（白瓜子）
黑龙江省牡丹江市宁安市兰岗镇（西香瓜）
黑龙江省绥化市兰西县榆林镇（兰榆蔬菜）
黑龙江省哈尔滨市宾县永和乡永和村（蔬菜）
黑龙江省齐齐哈尔市梅里斯达斡尔族区共和镇胜利村（香瓜）
黑龙江省齐齐哈尔市依安县依龙镇奋斗村（甜菜）
黑龙江省佳木斯市桦南县孟家岗镇群英村（黑木耳）
黑龙江省大庆市肇州县二井镇实现村（蔬菜）
黑龙江省大庆市大同区双榆树乡双胜村（小米）
上海市宝山区罗店镇天平村（食用菌）
上海市金山区漕泾镇水库村（淡水养殖）
上海市奉贤区青村镇（黄桃）
上海市松江区泖港镇（大米）
江苏省南京市溧水区东屏街道长乐社区（雪桃、草莓）
江苏省南京市江宁区汤山街道七坊村（休闲农业）
江苏省无锡市江阴市利港街道维常村（中华绒螯蟹）
江苏省徐州市邳州市八路镇（花卉）
江苏省常州市武进区雪堰镇城西回民村（梨）
江苏省常州市金坛区儒林镇湖头村（中华绒螯蟹）
江苏省苏州市昆山市巴城镇武神潭村（大闸蟹）
江苏省南通市如东县掘港街道虹桥村（果蔬）
江苏省南通市海安市大公镇于坝村（梨、桃）
江苏省连云港市灌南县张店镇张店社区（葡萄）
江苏省盐城市东台市新街镇（苗木）
江苏省扬州市仪征市马集镇合心村（黑莓）
江苏省镇江市丹徒区高桥镇高桥村（江蟹、扣蟹）
江苏省泰州市兴化市沙沟镇（淡水鱼）
江苏省泰州市姜堰区白米镇大安村（绿芦笋）
江苏省宿迁市宿城区罗圩乡（蔬果）
江苏省盐城市建湖县恒济镇苗庄村（大闸蟹）
江苏省南通市通州区东社镇（设施蔬菜）
江苏省泰州市高港区白马镇陈家村（水果）
浙江省衢州市常山县青石镇（胡柚）
浙江省金华市磐安县玉山镇（绿茶）
浙江省杭州市西湖区转塘街道上城埭村（绿茶）
浙江省台州市三门县海润街道涛头村（青蟹）
浙江省丽水市青田县三溪口街道白浦村（杨梅）
浙江省金华市浦江县黄宅镇（葡萄）
浙江省温州市平阳县南麂镇（大黄鱼）
浙江省杭州市余杭区径山镇径山村（红茶、绿茶）
浙江省湖州市长兴县和平镇长城村（芦笋）
浙江省嘉兴市桐乡市大麻镇（中华鳖）
浙江省绍兴市上虞区长塘镇罗村村（毛笋、笋干）
浙江省宁波市象山县泗州头镇里坑村（甜瓜）
安徽省淮北市烈山区烈山镇榴园村（石榴）
安徽省宿州市砀山县城庄镇坡里王屯村（西瓜）
安徽省阜阳市颍州区西湖镇汤庄村（恋思萝卜）
安徽省蚌埠市五河县城关镇沟东村（酥梨）
安徽省宣城市宣州区新田镇赵村村（宣木瓜）
安徽省宣城市绩溪县家朋乡万莲水村（山核桃）
安徽省池州市石台县丁香镇红桃村（红茶）
安徽省安庆市岳西县冶溪镇琥珀村（绿茶）
安徽省黄山市休宁县流口镇茗洲村（绿茶）
安徽省芜湖市南陵县烟墩镇霭里村（休闲农业）
安徽省宣城市广德市卢村乡石狮村（绿茶、黄茶等）
安徽省安庆市宿松县许岭镇雨岭村（猕猴桃）
安徽省淮南市八公山区八公山镇下郢村（豆制品加工）
安徽省黄山市祁门县芦溪乡芦溪村（红茶）
安徽省六安市舒城县舒茶镇（绿茶）
安徽省马鞍山市当涂县乌溪镇（蟹苗）
安徽省安庆市太湖县寺前镇（绿茶）
福建省福州市闽清县梅溪镇（橄榄）
福建省福州市福清市一都镇（枇杷）
福建省龙岩市连城县林坊镇（地瓜）
福建省龙岩市武平县东留镇（芙蓉李）
福建省南平市政和县澄源乡（白茶、红茶、绿茶）
福建省南平市浦城县仙阳镇（粮食）
福建省宁德市福安市社口镇（红茶）
福建省宁德市福安市赛岐镇（葡萄）
福建省宁德市柘荣县城郊乡（太子参）
福建省漳州市诏安县太平镇（青梅）
福建省漳州市南靖县书洋镇（乌龙茶）
福建省莆田市仙游县钟山镇（蔬菜）
福建省泉州市永春县五里街镇（水果）
福建省泉州市晋江市金井镇围头村（鲍鱼）
福建省南平市光泽县寨里镇山头村（富硒大米）
江西省南昌市新建区金桥乡小桥村（葡萄）
江西省赣州市于都县梓山镇潭头村（蔬菜）
江西省赣州市信丰县油山镇长安村（脐橙）
江西省抚州市东乡区王桥镇璋峰村（王桥花果芋）
江西省九江市武宁县澧溪镇北湾村（韩花梨）
江西省九江市彭泽县太平关乡白沙村（瓜蒌籽）
江西省宜春市袁州区洪塘镇布上村（蓝莓）
江西省宜春市上高县塔下乡茶十村（紫皮大蒜）
江西省上饶市德兴市张村乡张村村（德兴覆盆子）
江西省景德镇市浮梁县王港乡高沙村（杨梅）
江西省萍乡市莲花县高洲乡高滩村（大米）
江西省鹰潭市余江区潢溪镇金墩村（甘蔗）
江西省南昌市南昌县幽兰镇（蔬菜）
江西省赣州市崇义县龙勾乡（脐橙）
江西省抚州市南城县徐家镇（白花蛇舌草）
江西省吉安市吉水县白水镇（井冈蜜柚）
江西省吉安市安福县横龙镇（井冈蜜柚）
江西省上饶市上饶县五府山镇（蜂蜜）
江西省新余市分宜县双林镇（夏布）
山东省德州市乐陵市朱集镇（红枣）
山东省聊城市莘县董杜庄镇（西瓜）
山东省菏泽市定陶区黄店镇朱庄村（玫瑰）
山东省潍坊市高密市胶河生态发展区张家庄村（土豆）
山东省威海市文登区界石镇（樱桃）
山东省滨州市惠民县麻店镇（西瓜）
山东省临沂市沂南县蒲汪镇大王庄村（长虹岭花生）
山东省济南市历城区唐王镇（草莓）
山东省济宁市嘉祥县梁宝寺镇（大豆种、小麦种）
山东省枣庄市市中区齐村镇前良村（樱桃）
山东省淄博市沂源县燕崖镇（大樱桃）
山东省青岛市即墨区田横岛旅游度假区周戈庄村（海参）
山东省菏泽市巨野县麒麟镇南曹村（种鸭）
山东省临沂市临港经济开发区坪上镇（大樱桃）
山东省聊城市阳谷县七级镇（菠菜）
山东省泰安市宁阳县乡饮乡南赵庄村（粉皮、粉条）
山东省菏泽市郓城县南赵楼镇甄庄（平菇）
山东省临沂市沂水县泉庄镇（桃）
山东省德州市平原县坊子乡叶庄（西葫芦）
山东省济宁市曲阜市吴村镇（葡萄）
山东省青岛市莱西市河头店镇松旺庄村（西红柿、黄瓜）
山东省济宁市金乡县化雨镇（金针菇）
山东省烟台市福山区门楼镇两甲庄村（大樱桃）
山东省滨州市沾化区利国乡（洼地绵羊）
河南省安阳市林州市东姚镇北坡村（小米）
河南省洛阳市新安县马头村（樱桃）
河南省鹤壁市淇滨区上峪乡桑园村（乡村旅游）
河南省安阳市滑县八里营镇西苑村（甜瓜）
河南省南阳市西峡县丁河镇（香菇）
河南省驻马店市遂平县和兴镇大牛村（菜心、芥蓝、小白菜）
河南省平顶山市汝州市焦村镇水沟村（石榴）
河南省周口市鹿邑县任集乡冷庄行政村（西芹）
河南省驻马店市新蔡县砖店镇大宋庄村（有机蔬菜）
河南省周口市扶沟县曹里乡（蔬菜）
河南省商丘市柘城县慈圣镇陈阳村（辣椒）
河南省焦作市焦作城乡一体化示范区文昌办事处辛庄村（红宝石葡萄）
河南省信阳市固始县胡族铺镇迎河村（迎河柑橘）
河南省平顶山市叶县任店镇月庄村（韭菜）
河南省平顶山市郏县白庙乡白庙村（甘薯）
河南省南阳市内乡县余关镇（核桃）
河南省郑州市中牟县官渡镇孙庄村（蔬菜）
河南省漯河市临颍县皇帝庙乡吴集村（大蒜）
河南省焦作市武陟县北郭乡蔡庄村（怀药种苗繁育）
河南省许昌市建安区灵井镇霍庄村（社火道具）
湖北省武汉市新洲区旧街街石咀村（白茶）
湖北省襄阳市南漳县板桥镇董家台村（天麻）
湖北省荆州市松滋市王家桥镇（蜜柚）
湖北省宜昌市秭归县永田坝乡王家桥村（柑橘）
湖北省十堰市丹江口市习家店镇（柑橘）
湖北省十堰市竹山县竹坪乡（绿茶）
湖北省孝感市云梦县隔蒲潭镇大余村（马铃薯）
湖北省黄冈市麻城市福田河镇（麻城福白菊）
湖北省黄冈市黄梅县独山镇（水果）
湖北省咸宁市嘉鱼县高铁岭镇（斑点叉尾鮰）
湖北省随州市随县环潭乡柏树湾村（金银花茶）
湖北省恩施土家族苗族自治州鹤峰县燕子镇新行村（蔬菜）
湖北省恩施土家族苗族自治州来凤县翔凤镇老茶村（油茶）
湖北省恩施土家族苗族自治州咸丰县小村乡（白茶、绿茶、红茶）
湖北省潜江市老新镇秀河村（虾稻共作）
湖北省天门市九真镇明庙村（炒米）
湖北省荆门市钟祥市柴湖镇罗城村（盆花）
湖北省黄石市大冶市陈贵镇华垅村（花卉苗木）
湖南省长沙市浏阳市沿溪镇沙龙村（南瓜、莴笋）
湖南省衡阳市衡南县栗江镇六合村（花椒）
湖南省株洲市醴陵市明月镇云岩社区（醴陵玻璃椒）
湖南省湘潭市韶山市韶山乡韶山村（休闲农业）
湖南省邵阳市洞口县古楼乡（绿茶、红茶）
湖南省岳阳市湘阴县杨林寨乡（蔬菜）
湖南省常德市汉寿县龙阳街道王海坪社区（汉寿甲鱼）
湖南省张家界市永定区罗塔坪乡长寿村（莓茶）
湖南省益阳市赫山区泥江口镇横堤村（茶油）
湖南省郴州市嘉禾县晋屏镇宅侯村（宅侯贡米）
湖南省永州市冷水滩区伊塘镇孟公山村（西瓜）
湖南省怀化市洪江市岩垅乡（柑桔）
湖南省娄底市双峰县永丰镇（永丰辣酱）
湖南省湘西土家族苗族自治州永顺县松柏镇（猕猴桃）
湖南省湘西土家族苗族自治州保靖县比耳镇（柑橘）
湖南省湘西土家族苗族自治州保靖县洞山镇黄金村（绿茶）
广东省梅州市梅县区桃尧镇（梅县金柚）
广东省惠州市愽罗县柏塘镇（绿茶）
广东省韶关市乐昌市九峰镇（黄金宗李）
广东省肇庆市德庆县马圩镇（贡柑）
广东省江门市恩平市沙湖镇（沙湖大米）
广东省云浮市罗定市榃滨镇（肉桂）
广东省阳江市阳东区大沟镇（对虾）
广东省河源市连平县上坪镇（鹰嘴蜜桃）
广东省湛江市廉江市良垌镇（荔枝）
广东省汕头市潮南区雷岭镇（荔枝）
广东省梅州市五华县棉洋镇（红茶）
广东省云浮市郁南县建城镇（无核黄皮）
广东省韶关市始兴县澄江镇暖田村（有机蔬菜）
广东省梅州市兴宁市龙田镇碧园村（鸽）
广东省云浮市罗定市龙湾镇棠棣村（南药）
广东省广州市从化区温泉镇南平村（双核槐枝）
广东省肇庆市怀集县汶朗镇汶朗村（汶浪蜜柚）
广东省汕尾市陆丰市甲西镇博社村（麒麟西瓜）
广东省湛江市雷州市乌石镇那毛村（番薯）
广东省河源市紫金县南岭镇庄田村（绿茶）
广东省清远市清新区太和镇坑口村（红茶、绿茶、白茶）
广东省汕头市南澳县深澳镇后花园村（乌龙茶）
广东省江门市台山市海宴镇五丰村（菜心）
广东省梅州市蕉岭县南磜镇金山村（白及）
广西壮族自治区桂林市兴安县溶江镇（葡萄）
广西壮族自治区桂林市全州县安和镇（香芋）
广西壮族自治区桂林市阳朔县白沙镇（金桔）
广西壮族自治区贵港市桂平市麻垌镇（麻垌荔枝）
广西壮族自治区贵港市桂平市社坡镇（腐竹）
广西壮族自治区百色市右江区龙川镇（油茶）
广西壮族自治区柳州市柳江区成团镇鲁比村（葡萄）
广西壮族自治区柳州市鹿寨县鹿寨镇石路村（鹿寨蜜橙）
广西壮族自治区柳州市柳北区沙塘镇洛沙村（食用菌）
广西壮族自治区贵港市桂平市金田镇金田村（淮山）
广西壮族自治区钦州市浦北县白石水镇良田村（番石榴）
广西壮族自治区钦州市灵山县武利镇汉塘村（电商果苗）
广西壮族自治区梧州市蒙山县蒙山镇甘棠村（砂糖桔）
广西壮族自治区河池市天峨县岜暮乡公昌村（旱藕）
广西壮族自治区河池市南丹县城关镇四山村（猕猴桃）
广西壮族自治区百色市右江区龙川镇平禄村（油茶）
广西壮族自治区百色市田东县祥周镇模范村（香蕉）
海南省昌江黎族自治县十月田镇保平村（毛豆）
海南省海口市龙华区新坡镇仁里村（石斛）
海南省琼海市大路镇岭脚村（莲雾）
海南省文昌市东路镇永丰村委会（荔枝）
海南省儋州市大成镇推寨村委会南吉村（黄皮）
海南省琼海市塔洋镇（柠檬）
重庆市万州区龙驹镇龙溪村（绿茶）
重庆市涪陵区大顺乡天宝寺村（中药材）
重庆市沙坪坝区回龙坝镇回龙坝村（金沙杏）
重庆市南岸区南山街道双龙村（盆景）
重庆市长寿区云台镇八字村（水稻）
重庆市江津区石门镇（柑橘）
重庆市南川区兴隆镇金花村（蓝莓）
重庆市潼南区柏梓镇（柠檬）
重庆市璧山区七塘镇四合村（蔬菜）
重庆市城口县沿河乡联坪村（花菇）
重庆市丰都县龙孔镇楠竹村（柑桔）
重庆市武隆区白马镇豹岩村（蜂蜜）
重庆市忠县新立镇双柏村（柑橘）
重庆市开州区关面乡泉秀村（中药材）
重庆市云阳区双龙镇竹坪村（纽荷尔脐橙、红肉脐橙）
重庆市奉节县永乐镇大坝村（脐橙）
重庆市巫山县曲尺乡（巫山脆李）
重庆市巫溪县峰灵镇谭家村（冬桃）
重庆市石柱土家族自治县中益乡华溪村（蜂）
重庆市彭水苗族土家族自治县郁山镇钟鼓村（红薯）
四川省成都市都江堰市胥家镇（猕猴桃、蔬菜）
四川省成都市龙泉驿区柏合镇长松村（水蜜桃）
四川省自贡市富顺县互助镇（柑橘）
四川省泸州市古蔺县马蹄镇（甜橙）
四川省德阳市旌阳区和新镇（辣椒）
四川省绵阳市江油市二郎庙镇青林村（白花桃）
四川省广元市朝天区李家乡（蔬菜）
四川省内江市资中县甘露镇玉皇村（枇杷）
四川省内江市威远县越溪镇插旗村（绿茶）
四川省乐山市马边彝族自治县劳动乡福来村（绿茶）
四川省南充市仪陇县马鞍镇险岩村（香菇）
四川省南充市蓬安县三坝乡（锦橙）
四川省南充市营山县双林乡麻柳村（花椒）
四川省宜宾市筠连县巡司镇银星村（红茶、绿茶）
四川省广安市邻水县两河镇大桥村（脐橙）
四川省广安市岳池县顾县镇（中药材）
四川省达州市大竹县月华镇九银村（糯稻）
四川省巴中市平昌县鹿鸣镇燕山村（绿茶）
四川省雅安市石棉县回隆彝族乡石龙村（枇杷）
四川省眉山市青神县高台乡百家池村（柑桔）
四川省资阳市安岳县龙台镇花果村（柠檬）
四川省甘孜藏族自治州康定市姑咱镇达杠村（苹果）
四川省凉山彝族自治州德昌县锦川镇（桑葚）
贵州省黔东南苗族侗族自治州剑河县柳川镇清江村（剑河白香猪）
贵州省黔西南布依族苗族自治州册亨县岩架镇（糯米蕉）
贵州省遵义市余庆县龙家镇先锋村（稻渔）
贵州省遵义市绥阳县小关乡（山银花）
贵州省黔南布依族苗族自治州三都县普安镇（水晶葡萄）
贵州省贵阳市息烽县石硐镇大洪村（猕猴桃）
贵州省黔东南苗族侗族自治州黎平县尚重镇上洋村（有机稻米）
贵州省毕节市金沙县岚头镇三桥社区（绿茶）
贵州省黔东南苗族侗族自治州丹寨县兴仁镇烧茶村（蓝莓）
贵州省铜仁市碧江区滑石乡老麻塘村（稻米）
贵州省铜仁市印江县板溪镇凯塘村（食用菌）
贵州省六盘水市盘州市民主镇大厂荫村（绿茶）
贵州省毕节市威宁县猴场镇格寨村（苹果）
贵州省安顺市平坝区天龙镇高田村（蔬菜）
云南省昆明市呈贡区吴家营街道缪家营社区（宝珠梨）
云南省昆明市石林彝族自治县西街口镇新木凹村（人参果）
云南省玉溪市新平县嘎洒镇新寨村（柑橘）
云南省德宏傣族景颇族自治州梁河县大厂乡大厂村（绿茶）
云南省大理白族自治州祥云县刘厂镇松梅村（蚕桑）
云南省保山市昌宁县柯街镇芒赖社区（蔬菜）
云南省保山市隆阳区潞江镇江东村（火龙果）
云南省丽江市永胜县片角镇卜甲村（软籽石榴）
云南省丽江市玉龙县鲁甸乡鲁甸村（中药材）
云南省曲靖市会泽县待补镇（夏季草莓）
云南省楚雄彝族自治州元谋县黄瓜园镇（青枣）
云南省楚雄彝族自治州大姚县三台乡（核桃）
云南省玉溪市通海县秀山街道办事处（蔬菜）
云南省红河哈尼族彝族自治州绿春县骑马坝乡（胡椒）
云南省丽江市玉龙县拉市镇（丽江雪桃）
云南省丽江市华坪县中心镇（芒果）
云南省怒江傈僳族自治州泸水市老窝镇（老窝火腿）
云南省文山壮族苗族自治州西畴县新马乡响水村（水稻）
云南省迪庆藏族自治州维西傈僳族自治县塔城镇启别村（冰葡萄）
西藏自治区那曲市聂荣县帕玉村（奶制品）
西藏自治区那曲市班戈县佳琼镇热卡努玛村（畜产品加工销售）
西藏自治区山南市浪卡子县伦布雪乡苏格村（苏格绵羊）
西藏自治区日喀则市定结县琼孜乡牧村（羊毛加工）
西藏自治区日喀则市江孜县年堆乡萨培村（卡垫）
西藏自治区昌都市洛隆县孜托镇格亚村（青稞）
陕西省延安市洛川县槐柏镇（苹果）
陕西省安康市紫阳县焕古镇（绿茶）
陕西省西安市蓝田县华胥镇（樱桃）
陕西省渭南市白水县雷牙镇（苹果）
陕西省榆林市府谷县木瓜镇（府谷黄米）
陕西省铜川市印台区红土镇（苹果）
陕西省汉中市西乡县峡口镇（绿茶）
陕西省咸阳市武功县武功镇（小麦玉米良种繁育）
陕西省商洛市商南县富水镇（绿茶）
陕西省宝鸡市麟游县酒房镇（蔬菜）
陕西省榆林市神木市栏杆堡镇（黑豆）
陕西省韩城市芝阳镇迪庄村（花椒）
陕西省商洛市山阳县南宽坪镇甘沟村（绿茶）
陕西省榆林市绥德县义合镇墕头村（苹果）
陕西省安康市石泉县石泉饶峰胜利村（黄花菜）
陕西省延安市延川县贾家坪镇石窑村（设施蔬菜）
陕西省渭南市澄城县交道镇樊家川村（酥梨）
陕西省西安市周至县哑柏镇昌西村（猕猴桃）
陕西省宝鸡市岐山县青化镇孙家村（苹果）
陕西省咸阳市三原县马额发展服务中心新邵村（苹果）
陕西省榆林市米脂县桃镇申家沟村（谷子）
陕西省汉中市留坝县江口镇柘梨园村（食用菌）
陕西省铜川市耀州区孙塬镇文昌村（花椒）
甘肃省白银市靖远县五合镇白茨林村（枸杞）
甘肃省酒泉市玉门市清泉乡跃进村（人参果）
甘肃省兰州市永登县苦水镇（苦水玫瑰）
甘肃省陇南市礼县永兴镇捷地村（苹果）
甘肃省白银市会宁县杨崖集镇杨崖集村（中药材）
甘肃省武威市天祝藏族自治县华藏寺镇岔口驿村（蔬菜）
甘肃省天水市秦安县安伏镇（苹果）
甘肃省张掖市肃南裕固族自治县大河乡（牛、羊）
甘肃省武威市民勤县收成镇（蜜瓜）
甘肃省平凉市庄浪县万泉镇（苹果）
青海省西宁市湟中县鲁沙尔镇上重台村（娃娃菜）
青海省西宁市湟中县田家寨镇拉尕村（红根甜菜）
青海省海东市乐都区洪水镇李家壕村（乐都大樱桃）
青海省海东市民和回族土族自治县西沟乡南垣村（油用牡丹）
青海省海西蒙古族藏族自治州德令哈市怀头他拉镇绿源村（红枸杞）
青海省黄南藏族自治州泽库县宁秀乡拉格日村（藏羊）
青海省黄南藏族自治州河南蒙古族自治县多松乡夏日达哇村（牦牛）
青海省海南藏族自治州贵德县尕让乡黄河滩村（露天辣椒）
宁夏回族自治区中卫市沙坡头区永康镇彩达村（苹果）
宁夏回族自治区固原市西吉县田坪乡大岔村（马铃薯）
宁夏回族自治区吴忠市盐池县高沙窝镇施记圈村（滩羊）
宁夏回族自治区中卫市中宁县徐套乡田家滩村（硒砂瓜）
宁夏回族自治区银川市灵武市郝家桥镇西渠村（特色草制品加工）
宁夏回族自治区银川市灵武市梧桐树乡沙坝头村（露地西瓜）
宁夏回族自治区固原市彭阳县孟塬乡小石沟村（中华蜂）
宁夏回族自治区固原市原州区寨科乡蔡川村（肉牛养殖）
宁夏回族自治区吴忠市利通区金积镇大庙桥村（设施辣椒）
新疆维吾尔自治区阿克苏地区阿克苏市依干其乡尤喀克巴里当村（林果）
新疆维吾尔自治区喀什地区麦盖提县库木库萨尔乡吐孜鲁克喀什村（棉花）
新疆维吾尔自治区和田地区洛浦县拜什托格拉克乡伊斯勒克墩村（红枣）
新疆维吾尔自治区和田地区洛浦县拜什托格拉克乡（红枣）
新疆维吾尔自治区哈密市巴里坤哈萨克自治县三塘湖镇中湖村（哈密瓜）
新疆维吾尔自治区喀什地区疏勒县库木西力克乡库木西力克村（制种小麦、复播谷子）
新疆维吾尔自治区昌吉回族自治州呼图壁县二十里店镇林场村（苗木、花卉）
新疆维吾尔自治区吐鲁番市托克逊县郭勒布依乡硝尔村（蔬菜）
新疆维吾尔自治区伊犁哈萨克自治州霍城县芦草沟镇四宫村（薰衣草）
新疆维吾尔自治区阿克苏地区柯坪县阿恰勒镇（恰玛古）
新疆维吾尔自治区阿克苏地区库车县塔里木乡英达雅村（塔里木草湖小山羊）
新疆生产建设兵团第二师25团（辣椒）
新疆生产建设兵团第三师50团（冬枣）
新疆生产建设兵团第二师22团（色素辣椒）
新疆生产建设兵团第二师25团三连（葡萄）
新疆生产建设兵团第五师84团七连（生猪）

## Sheet: 8
北京市海淀区上庄镇西马坊村（京西稻）
北京市通州区西集镇沙古堆村（通州大樱桃）
北京市房山区韩村河镇圣水峪村（香椿）
北京市平谷区大华山镇西牛峪村（玉露香梨）
北京市顺义区龙湾屯镇焦庄户村（苹果）
北京市延庆区四海镇前山村（京水源菊花茶）
北京市怀柔区桥梓镇岐庄村（岐庄尜尜枣）
北京市昌平区十三陵镇康陵村（正德春饼宴）
北京市怀柔区渤海镇（怀柔板栗）
天津市武清区河北屯镇肖赶庄村（西红柿）
天津市蓟州区出头岭镇李家仓村（香菇）
天津市蓟州区别山镇西史各庄村（红花峪桑椹）
河北省正定县正定镇塔元庄村（无花果）
河北省滦平县火斗山乡孙营村（草莓）
河北省平泉市小寺沟镇河沟子村（苹果）
河北省张北县小二台镇德胜村（德胜马铃薯）
河北省尚义县七甲乡大六号村（结球生菜）
河北省迁西县汉儿庄乡杨家峪村（迁西板栗）
河北省大城县权村镇后李各庄（金丝小枣）
河北省肃宁县万里镇西辛庄（蔬菜）
河北省宁晋县苏家庄镇伍烈霍村（宁晋鸭梨）
河北省新乐市邯邰镇（新乐西瓜）
河北省兴隆县孤山子镇（兴隆板栗）
河北省昌黎县十里铺乡（葡萄）
河北省易县独乐乡（林果）
河北省阜城县霞口镇（阜兴梨）
山西省平顺县佛龙溪镇堂岭村（平顺潞党参）
山西省襄汾县景毛乡申村（晋乡红苹果）
山西省隰县阳头升乡竹干村（隰县梨）
山西省汾阳市栗家庄乡（裕源核桃）
山西省太谷县任村乡（美枝蔬菜）
山西省曲沃县里村镇（里丰葡萄）
内蒙古自治区兴安盟科尔沁右翼前旗归流河镇巴达仍贵嘎查（巴达仍贵大米）
内蒙古自治区巴彦淖尔市乌拉特后旗潮格温都尔镇西尼乌素嘎查（戈壁红驼）
内蒙古自治区巴彦淖尔市乌拉特中旗温更镇阿拉腾呼少嘎查（二郎山白绒山羊）
内蒙古自治区包头市九原区哈业胡同镇新胜村（黑柳子甜瓜）
内蒙古自治区呼伦贝尔市莫力达瓦达斡尔族自治旗腾克镇东伊必奇村（莫力达瓦大豆）
内蒙古自治区呼伦贝尔市阿荣旗向阳峪镇太平沟村（蛾中仙柞蚕）
内蒙古自治区鄂尔多斯市达拉特旗树林召镇东海心村（大树湾黄河鱼）
内蒙古自治区乌兰察布市集宁区马莲渠乡霸王河村（霸王河蔬菜）
内蒙古自治区赤峰市喀喇沁旗王爷府镇（喀喇沁番茄）
内蒙古自治区赤峰市巴林左旗十三敖包镇（笤帚）
辽宁省沈阳市辽中区刘二堡镇皮家堡村（葡萄）
辽宁省沈阳市辽中区冷子堡镇金山堡村（淡水鱼）
辽宁省大石桥市高坎镇党家村（高坎淡水鱼）
辽宁省盘锦市大洼区唐家镇白家村 （碱地西红柿）
辽宁省瓦房店市驼山乡（大樱桃）
辽宁省瓦房店市得利寺镇（得利寺大樱桃）
吉林省白城市洮北区洮河镇连城村（御粟小米）
吉林省德惠市布海镇长山村（蔬乡门地瓜菜）
吉林省东丰县横道河镇大房村（马记鹿茸）
吉林省伊通满族自治县景台镇秀山村（伊通榛子）
吉林省公主岭市怀德镇三里堡子村（棚膜蔬菜）
吉林省珲春市敬信镇防川村（乡村旅游）
吉林省辉南县楼街乡茂盛村（稻鸣香米）
吉林省舒兰市平安镇（舒兰大米）
黑龙江省肇源县义顺乡东义顺村（奶牛、肉牛）
黑龙江省穆棱市下城子镇悬羊村（黑木耳）
黑龙江省宁安市江南乡东安村（寒地果）
黑龙江省萝北县团结镇工农兵村（水稻）
黑龙江省密山市和平朝鲜族乡新建村（蔬菜）
黑龙江省海伦市东林乡战胜村（菇娘）
黑龙江省铁力市铁力镇满江红村（平贝）
黑龙江省依安县红星乡红旗村（果蔬）
黑龙江省齐齐哈尔市梅里斯达斡尔族区雅尔塞镇（蔬菜）
江苏省南京市溧水区洪蓝镇傅家边村（傅家边林果）
江苏省徐州市贾汪区潘安湖街道马庄村（香包）
江苏省溧阳市戴埠镇牛场村（牛场南天竺）
江苏省太仓市城厢镇电站村（翠冠梨）
江苏省启东市南阳镇元祥村（四青作物）
江苏省灌南县新集镇周庄村（果蔬）
江苏省宝应县汜水镇新荡村（有机稻米、蔬菜）
江苏省句容市白兔镇白兔村（云兔草莓）
江苏省兴化市永丰镇蔡星村（兴化大闸蟹）
江苏省苏州市吴中区甪直镇江湾村（设施蔬菜）
江苏省东台市三仓镇（东台西瓜）
江苏省丰县宋楼镇（大沙河苹果）
江苏省响水县南河镇（西兰花）
浙江省乐清市雁荡镇能仁村（雁荡毛峰）
浙江省桐乡市梧桐街道桃园村（桐乡槜李）
浙江省湖州市南浔区千金镇东马干村（黄颡鱼）
浙江省庆元县竹口镇黄坛村（甜橘柚）
浙江省建德市杨村桥镇（草莓）
浙江省象山县定塘镇（柑橘）
浙江省江山市塘源口乡（猕猴桃）
浙江省缙云县大洋镇（高山茭白）
浙江省天台县永溪乡（香米）
浙江省温岭市滨海镇（葡萄）
浙江省宁海县一市镇（白枇杷）
安徽省旌德县云乐镇陈岭村（旌德灵芝）
安徽省青阳县酉华镇乐元村（九华黄精）
安徽省太湖县百里镇大竹村（太湖黄牛）
安徽省繁昌县平铺镇新塘村（中典小龙虾）
安徽省界首市陶庙镇赵庄村（丰絮马铃薯）
安徽省怀远县白莲坡镇姚山村（姚山甲鱼）
安徽省六安市裕安区狮子岗乡新华村（狮果岭红桃）
安徽省蒙城县小辛集乡李大塘村（西兰花）
安徽省淮南市大通区上窑镇张郢村（菌润双孢菇）
安徽省灵璧县渔沟镇纸房村（华馗黄瓜）
安徽省来安县张山乡张山村（中郢油桃）
安徽省当涂县湖阳镇（石臼湖螃蟹）
安徽省潜山县塔畈乡（彭河绿茶）
福建省连城县文亨镇鲤江村（文亨红衣花生）
福建省松溪县郑墩镇万前村（万前百年蔗）
福建省福鼎市点头镇柏柳村（福鼎白茶）
福建省宁化县曹坊镇石牛村（闽娇辣椒）
福建省德化县春美乡（德化黄花菜）
福建省连城县朋口镇（连城兰花）
福建省龙岩市永定区仙师镇（永定六月红早熟芋）
江西省崇义县麟潭乡两杰村（刺葡萄）
江西省宁都县田头镇白沙村（席草）
江西省广昌县盱江镇彭田村（广昌白莲）
江西省吉安县横江镇良枧村（横江葡萄）
江西省彭泽县太泊湖农业综合开发区泊湖村（稻虾共作）
江西省奉新县会埠镇西庄村（伊田圆鲜蔬）
江西省弋阳县叠山镇周潭村（弋阳大禾谷）
江西省上栗县赤山镇麻田村（冰糖柚）
江西省新余市渝水区良山镇下保村（花卉苗木）
江西省南昌县冈上镇（鸭苗）
江西省浮梁县臧湾乡（浮梁茶）
山东省昌邑市饮马镇山阳村（山阳大梨）
山东省沂南县蒲汪镇茶坡村（茶坡芹菜）
山东省泰安市泰山区省庄镇小津口村（津口女儿茶）
山东省淄博市博山区博山镇上瓦泉村（博山草莓）
山东省莱芜市莱城区牛泉镇贺小庄村（莱芜鸡腿葱）
山东省邹平县黛溪街道办事处张高村（张高水杏）
山东省茌平县贾寨镇耿店村（茌星蔬菜）
山东省济南市南部山区高而办事处核桃园村（核桃）
山东省菏泽市定陶区南王店镇王楼村（南王店西瓜）
山东省巨野县万丰镇阚店村（苦瓜）
山东省青岛市黄岛区大场镇南辛庄村（从荣草莓）
山东省莒县峤山镇（莒县大姜）
山东省单县李新庄镇（单县香瓜）
山东省荣成市港西镇（荣成无花果）
山东省东营市河口区新户镇（海参）
山东省枣庄市薛城区周营镇（果蔬）
山东省平原县王杲铺镇（杲牌黄瓜）
山东省微山县南阳镇（休闲农业）
山东省五莲县潮河镇（日照绿茶）
河南省长葛市佛耳湖镇尚庄村（长葛蜂蜜）
河南省渑池县任村乡南坻坞村（仰韶贡米）
河南省鲁山县熊背乡大年沟村（大年沟血桃）
河南省灵宝市尹庄镇前店村（昌盛宝菇）
河南省南乐县西邵乡李崇町村（西邵红杏）
河南省平舆县东皇街道大王寨村（平舆白芝麻）
河南省淅川县九重镇张河村（淅川软籽石榴）
河南省唐河县马振扶镇前庄村（乡村旅游）
河南省鹤壁市鹤山区姬家山乡东齐村（红油香椿）
河南省潢川县付店镇（潢川空心贡面）
河南省夏邑县北岭镇（夏邑西瓜）
湖北省随县三里岗镇吉祥寺村（随州香菇）
湖北省南漳县东巩镇双坪村（南漳黑木耳）
湖北省五峰土家族自治县采花乡星岩坪村（五峰茶叶）
湖北省咸宁市咸安区高桥镇白水村（白水畈萝卜）
湖北省远安县茅坪场镇瓦仓村（瓦仓大米）
湖北省荆州市开发区滩桥镇移民新村（一米金橘）
湖北省荆门市漳河新区双喜街双井村（双井西瓜）
湖北省武汉市洪山区洪山街先建村（洪山菜薹）
湖北省大冶市金山店镇向阳村（香李）
湖北省大冶市保安镇沼山村（狗血桃）
湖北省武汉市东西湖区东山办事处群力大队（东西湖葡萄）
湖北省宣恩县万寨乡（伍家台贡茶）
湖北省嘉鱼县陆溪镇（嘉鱼珍湖莲藕）
湖北省咸丰县坪坝营镇墨池寺村（滋恬富硒藤茶）
湖南省浏阳市普迹镇书院新村（爽健毛豆）
湖南省新邵县潭府乡中潭村（玉辉猕猴桃）
湖南省澧县复兴镇双堰村（复兴苹果柚）
湖南省桃江县马迹塘镇京华村（桃江竹笋）
湖南省新田县陶岭镇仁岗村（三味辣椒）
湖南省新化县奉家镇渠江源村（茶叶）
湖南省麻阳县高村镇大力林村（莲馨柑桔）
湖南省湘乡市毛田镇（香露红茶叶）
湖南省常宁市塔山瑶族乡（塔山山岚茶）
湖南省慈利县苗市镇（湘慈柑桔）
湖南省桂阳县莲塘镇（莲塘中药材）
广东省珠海市斗门区白蕉镇昭信村（海鲈鱼）
广东省郁南县东坝镇思磊村（东坝蚕茧）
广东省龙门县麻榨镇下龙村（绿安杨桃）
广东省信宜市洪冠镇（洪冠南药）
广东省高州市根子镇（荔枝）
广东省乐昌市北乡镇（北乡马蹄）
广西壮族自治区贺州市八步区贺街镇西南村（八步三华李）
广西壮族自治区龙胜各族自治县乐江乡地灵村（龙胜红糯）
广西壮族自治区全州县绍水镇柳甲村（福禄旺沙糖桔）
广西壮族自治区武宣县黄茆镇麻爪村（麻爪大果枇杷）
广西壮族自治区百色市右江区四塘镇六合村（芒果）
广西壮族自治区博白县菱角镇石柳村（沃柑）
广西壮族自治区武宣县东乡镇风沿村（红心蜜柚）
广西壮族自治区北流市北流镇六行村（北流荔枝）
广西壮族自治区田东县林逢镇林驮村（田东香芒）
海南省昌江县十月田镇好清村（香水菠萝）
海南省琼中县湾岭镇岭脚村（桑蚕）
海南省琼中县红毛镇罗坎村（山茶油）
海南省琼中县和平镇长兴村二队（飞瀑山咖啡）
海南省儋州市木棠镇铁匠村（黄花梨木）
重庆市万州区白羊镇大弯村（万州柠檬）
重庆市涪陵区南沱镇睦和村（涪陵龙眼）
重庆市九龙坡区西彭镇真武宫村（葡萄）
重庆市长寿区邻封镇邻封村（长寿沙田柚）
重庆市长寿区龙河镇四坪村（柑橘）
重庆市江津区西湖镇青泊村（柑橘）
重庆市大足区棠香街道五星社区（足源枇杷）
重庆市万盛区黑山镇南门村（黑山猕猴桃）
重庆市垫江县砚台镇登丰村（青花椒）
重庆市武隆区火炉镇筏子村（火炉脆桃）
重庆市荣昌区吴家镇双流村（蔬菜）
重庆市云阳县泥溪镇胜利村（黑木耳）
重庆市合川区古楼镇山林村（枇杷）
重庆市忠县新立镇（柑橘）
四川省邛崃市火井镇双童村（绿佳康猕猴桃）
四川省米易县草场乡龙华村（枇杷）
四川省中江县杰兴镇觉慧村（中江挂面）
四川省绵阳市游仙区云凤镇柏荣村（川仙生态鱼）
四川省青川县板桥镇红旗村（黑木耳）
四川省蓬溪县任隆镇八角村（蓬溪仙桃）
四川省内江市东兴区新店乡上塘坊村（上塘坊青花椒）
四川省马边彝族自治县苏坝镇白杨槽村（马边绿茶）
四川省筠连县筠连镇五凤村（筠练黄牛）
四川省广安市广安区龙安乡群策村（龙安柚）
四川省青神县南城镇兰沟村（青神竹编）
四川省九寨沟县陵江乡七里村（九寨沟甜樱桃）
四川省西昌市西乡乡凤凰村（月凤紫晶葡萄）
四川省石棉县宰羊乡坪阳村（石棉黄果柑）
四川省金堂县清江镇（金乡姬菇）
四川省荣县来牟镇（牟芽青茶叶）
四川省广元市昭化区柳桥乡（昭化茯苓）
四川省达州市达川区百节镇（达县乌梅）
贵州省铜仁市万山区敖寨乡中华山村（食用菌）
贵州省安顺市西秀区双堡镇大坝村（安顺金刺梨）
贵州省紫云县坝羊镇新山村（星秀山茶叶）
贵州省晴隆县长流乡溪流村（辣木）
贵州省赤水市两河口镇大荣村（竹叶鱼）
贵州省盘州市盘关镇贾西村（刺梨）
贵州省贵阳市乌当区百宜镇洛坝村（百宜辣椒）
贵州省金沙县木孔镇湾子社区（湾子辣椒）
贵州省黔西县金碧镇杨家店村（药用皂角）
云南省临沧市临翔区博尚镇永泉村（博尚菜籽油）
云南省镇康县忙丙乡马鞍山村（镇康马鞍山茶）
云南省云龙县诺邓镇天池村（麦地湾梨）
云南省屏边县湾塘乡阿碑村（屏边荔枝）
云南省勐海县格朗和乡南糯山村（古树茶）
云南省绥江县新滩镇石龙村（半边红李子）
云南省腾冲市马站乡和睦社区（腾冲红花油茶）
云南省宾川县拉乌乡（宾川拉乌核桃）
云南省石林县西街口镇（人参果）
云南省华坪县荣将镇（华坪芒果）
云南省宣威市务德镇（坤太干辣椒）
西藏自治区八宿县拉根乡拉根村（荞麦）
西藏自治区聂荣县色庆乡帕玉村（奶制品）
西藏自治区山南市乃东区结巴乡多若村（春梅草莓）
西藏自治区拉萨市城关区夺底乡（树莓）
西藏自治区曲水县达嘎乡（艾玛岗土豆）
陕西省吴堡县岔上镇丁家畔村（吴堡红枣）
陕西省宁强县高寨子街道办事处肖家坝村（青木川绿茶）
陕西省乾县梁山镇官地村（梁山双矮苹果）
陕西省紫阳县瓦庙镇新华村（魔芋）
陕西省柞水县下梁镇西川村（柞水黑木耳）
陕西省凤县双石铺镇十里店村（花椒）
陕西省澄城县韦庄镇东白龙村（东白龙冬枣）
陕西省陇县温水镇坪头村（香菇）
陕西省子洲县淮宁湾镇前清水沟村（黄土屲苹果）
陕西省武功县大庄镇大西村（番茄）
陕西省旬邑县城关镇纸坊村（甜瓜）
陕西省吴起县五谷城镇桐寨村（肥土地谷子）
陕西省佛坪县越坝镇大古坪村（佛坪土蜂蜜）
陕西省千阳县南寨镇（苹果）
陕西省大荔县朝邑镇（天荔冬枣）
陕西省靖边县王渠则镇（靖边荞麦）
陕西省镇安县达仁镇（镇安象园茶）
陕西省汉中市南郑区牟家坝镇（绿茶）
陕西省洛川县老庙镇（延美苹果）
甘肃省张掖市甘州区花寨乡花寨村（金花寨小米）
甘肃省甘谷县磐安镇燕家庄村（韭菜）
甘肃省定西市安定区香泉镇陈家屲村（定西马铃薯）
甘肃省金昌市金川区宁远堡镇东湾村（东湾绿萝卜）
甘肃省兰州市兰州新区中川镇赖家坡村（玫瑰）
甘肃省永靖县三塬镇下塬村（蔬菜）
甘肃省瓜州县瓜州乡三工村（哈密瓜）
甘肃省灵台县独店镇冯家堡村（苹果）
甘肃省高台县巷道镇东联村（果蔬）
青海省湟中县拦隆口镇上庄村（大葱）
青海省湟中县田家寨镇田家寨村（千紫缘枸杞芽茶）
青海省湟中县土门关乡上山庄村（休闲农业）
青海省互助县西山乡郭家沟村（马铃薯）
青海省贵德县新街乡鱼山村（蒜苗）
青海省乌兰县茶卡镇（乌兰茶卡羊）
宁夏回族自治区西吉县红耀乡井湾村（西吉马铃薯）
宁夏回族自治区泾源县香水镇上桥村（泾源黄牛肉）
宁夏回族自治区盐池县花马池镇柳杨堡村（盐池滩羊）
宁夏回族自治区永宁县望远镇板桥村（蔬菜）
宁夏回族自治区中宁县舟塔乡潘营村（中宁枸杞）
宁夏回族自治区灵武市梧桐树乡（兴唐贡米）
宁夏回族自治区彭阳县红河镇（彭阳辣椒）
新疆维吾尔自治区阜康市城关镇头工中心村（西红柿）
新疆维吾尔自治区察布查尔锡伯自治县绰霍尔乡博斯坦村（水稻）
新疆维吾尔自治区富蕴县喀拉布勒根乡喀拉苏村（玉米）
新疆生产建设兵团第四师可克达拉市73团4连（哈沙科大米）
新疆生产建设兵团第一师阿拉尔市4团（四团吊干杏）
新疆生产建设兵团第十师182团（食葵）
新疆生产建设兵团第十三师柳树泉农场（无核白葡萄）

## Sheet: 7
第七批全国一村一品示范村镇名单
北京市房山区琉璃河镇周庄村（慧田菊花）
北京市顺义区木林镇贾山村（水云天西红柿）
北京市顺义区大孙各庄镇前陆马村（绿奥番茄）
北京市大兴区礼贤镇东黄垡村（立征春雨黄瓜）
北京市大兴区青云店镇东辛屯村（民俗旅游）
北京市大兴区魏善庄镇（月季）
北京市密云区巨各庄镇后焦家坞村（密原味西红柿）
北京市平谷区金海湖镇茅山后村（茅山后佛见喜梨）
天津市西青区辛口镇水高庄村（淀绿西红柿）
天津市武清区汊沽港镇大王堡村（久保桃）
天津市武清区东马圈镇西马房村（西马房打瓜）
河北省丰宁满族自治县鱼儿山镇土城沟村（有机蔬菜）
河北省兴隆县蓝旗营镇苇子峪村（兴隆板栗）
河北省滦平县金沟屯镇下营子村（山知话药茶）
河北省香河县刘宋镇庆功台村（荷情荷礼藕荷）
河北省望都县赵庄乡小辛庄村（荷花淀莲藕）
河北省隆尧县固城镇小孟村（小孟甜瓜）
河北省灵寿县南寨乡马家庄村（灵莹舍葡萄）
河北省邱县新马头镇东常屯村（玉海园油桃）
河北省鸡泽县鸡泽镇魏青村（鸡泽辣椒）
河北省怀安县左卫镇叶家辛窑村（温室蔬菜）
河北省张北县二台镇金家村（马铃薯）
河北省秦皇岛市海港区驻操营镇大道岭村（板栗加工品）
河北省深州市穆村乡西马庄村（深州蜜桃）
河北省饶阳县王同岳乡（饶阳葡萄）
河北省安国市郑章镇（民丰达中药材）
山西省沁水县柿庄镇应郭村（蟹味菇）
山西省长治县南宋乡东掌村（休闲农业）
山西省孝义市梧桐镇南曹村（九州香豆制品）
山西省洪洞县曲亭镇东张村（洪洞莲藕）
山西省曲沃县北董乡（北董大蒜）
内蒙古自治区达拉特旗昭君镇沙圪堵村（二沟湾大米）
内蒙古自治区包头市东河区沙尔沁镇东园村（沁兴园西红柿）
内蒙古自治区科右前旗巴拉格歹乡中安村（杂粮杂豆）
内蒙古自治区鄂温克族自治旗锡尼河西苏木巴彦胡硕嘎查（民俗旅游）
内蒙古自治区包头市九原区哈业胡同镇永丰村（卫东南瓜）
内蒙古自治区武川县耗赖山乡圪顶盖村（塞上蒙菇）
内蒙古自治区阿荣旗新发乡东光村（水稻）
内蒙古自治区五原县隆兴昌镇联合村（五原黄柿子）
内蒙古自治区赤峰市松山区大庙镇吴家营子村（春志西红柿）
内蒙古自治区化德县朝阳镇民乐村（化德大白菜）
内蒙古自治区阿鲁科尔沁旗天山镇前岗台村（那日牧小米）
辽宁省大连市金普新区大魏家街道（金州大樱桃）
辽宁省大连市普兰店区星台街道葡萄沟村（巍霸山棚桃）
辽宁省海城市接文镇王家村（闯盛南果梨）
辽宁省宽甸县长甸镇河口村（燕红桃）
辽宁省北镇市常兴店镇范屯村（北镇葡萄）
辽宁省盘锦市大洼区新兴镇腰岗子村（稻田河蟹）
辽宁省绥中县小庄子镇永安村（瑞州小庄子土豆）
吉林省珲春市板石镇孟岭村（孟宝苹果）
吉林省镇赉县镇赉镇太平山村（鑫杏花村大葱）
吉林省长春市九台区上河湾镇双顶村（金红苹果）
吉林省永吉县西阳镇兴隆村（棚膜蔬菜）
吉林省双辽市东明镇前太平村（有机大米）
吉林省柳河县安口镇烧锅村（珍榛香大果榛子）
吉林省长春市双阳区平湖街道办事处黑鱼村（颁金葡萄）
吉林省敦化市秋梨沟镇（林芝玉木耳）
黑龙江省尚志市珍珠山乡（尚志黑木耳）
黑龙江省哈尔滨市双城区韩甸镇白土村（农娃花生）
黑龙江省齐齐哈尔市龙沙区大民镇大民村（黑月亮蔬菜）
黑龙江省肇州县新福乡耀先村（庆州香瓜）
黑龙江省海林市海林镇蔬菜村（威虎山蔬菜）
黑龙江省牡丹江市西安区温春镇大莫村（龙莫绿蔬蔬菜）
黑龙江省七台河市茄子河区宏伟镇岚棒山村（岚棒山大果榛子）
黑龙江省勃利县青山乡奋斗村（黑甜甜葡萄）
黑龙江省庆安县庆安镇福安村（元宝沟婆婆丁）
江苏省宜兴市万石镇后洪村（陶都水芹菜）
江苏省沛县张寨镇陈油坊村（陈由方葡萄）
江苏省金坛区朱林镇黄金村（有机稻米）
江苏省常熟市董浜镇里睦村（蔬菜）
江苏省启东市王鲍镇庙桥村（庙桥山药）
江苏省海安县南莫镇邓庄村（食用菌）
江苏省连云港市赣榆区黑林镇河西村（蓝莓）
江苏省盐城市大丰区大中镇海防村（裕华大蒜）
江苏省南京市溧水区晶桥镇水晶村（晶湖螃蟹）
江苏省句容市茅山镇丁家边村（桑葚）
江苏省徐州市贾汪区耿集街道办事处（草莓）
江苏省溧阳市社渚镇（溧阳青虾）
江苏省东海县石梁河镇（石梁河葡萄）
江苏省兴化市安丰镇（兴化大闸蟹）
江苏省南京市高淳区阳江镇（固城湖螃蟹）
江苏省广陵区头桥镇红平村（有机稻米）
江苏省沭阳县庙头镇（花卉苗木）
浙江省湖州市吴兴区东林镇泉庆村（泉佳潭鲈鱼）
浙江省桐乡市石门镇殷家漾村（殷家漾蜜梨）
浙江省兰溪市女埠街道穆坞村（穆坞枇杷）
浙江省慈溪市横河镇（慈溪杨梅）
浙江省宁海县桑洲镇（望海茶茶叶）
浙江省磐安县新渥镇（磐五味中药材）
浙江省三门县蛇蟠乡（三门青蟹）
安徽省庐江县同大镇永安村（同大圩葡萄）
安徽省太湖县北中镇望天村（天华谷尖绿茶）
安徽省来安县半塔镇罗庄村(罗庄葡萄)
安徽省郎溪县姚村乡妙泉村(瑞草魁茶叶)
安徽省东至县花园乡源口村(绿茶)
安徽省枞阳县官埠桥镇官山村(仙羽舌白茶)
安徽省临泉县高塘镇贾王村(辣椒)
安徽省无为县无城镇董桥村(羽毛加工)
安徽省广德县卢村镇笄山村(休闲农业)
安徽省黄山市屯溪区奕棋镇徐村(设施蔬菜)
安徽省蒙城县乐土镇双龙社区(谷婆婆西葫芦)
安徽省霍山县大化坪镇(霍山黄芽)
福建省柘荣县东源乡铁场村(辣椒)
福建省永春县东关镇外碧村(永春白番鸭)
福建省上杭县临城镇九洲村(九翠洲蜜雪梨)
福建省永安市西洋镇内炉村(永安内炉芙蓉李)
福建省三明市三元区莘口镇楼源村(蔬菜)
福建省建瓯市水源乡桃源村(建瓯锥栗)
福建省建瓯市房道镇连地村(连地白笋)
江西省赣州市章贡区沙石镇火燃村(茹蔬城食用菌)
江西省瑞金市叶坪乡田坞村(京瑞民兴辣椒)
江西省黎川县华山镇洲湖村(白茶)
江西省铜鼓县大塅镇交山村(有机白茶)
江西省莲花县良坊镇新田村(甜叶菊)
江西省南昌县黄马乡(蔬菜)
江西省永丰县佐龙乡(辣椒)
江西省庐山市横塘镇(羽绒电商)
江西省横峰县葛源镇(春桂葛根)
江西省乐平市乐港镇(乐港蔬菜)
江西省分宜县凤阳镇(凤扬西瓜)
山东省栖霞市蛇窝泊镇东院头村（日月爱霞苹果）
山东省沂水县诸葛镇（沂水苹果）
山东省枣庄市山亭区山城街道（山亭花椒）
山东省禹城市辛店镇沙河辛村（沙河辛西瓜）
山东省济阳县仁风镇（仁风西瓜）
山东省寿光市稻田镇桂河三村（桂河芹菜）
山东省威海市文登区高村镇沙柳村（沙柳村西红柿）
山东省莱芜市莱城区高庄街道曹家庄村（高庄芹菜）
山东省菏泽市定陶区南王店镇（南王店西瓜）
山东省惠民县皂户李镇（苗木花卉）
山东省平度市蓼兰镇（平度大花生）
山东省高青县常家镇蓑衣樊村（高青大米）
山东省邹城市中心店镇（中心店草莓）
山东省平邑县地方镇（天宝山山楂）
山东省莱芜市莱城区牛泉镇庞家庄村（大南山山楂干）
山东省成武县张楼镇乔庄行政村（青展黄瓜）
山东省高密市阚家镇松兴屯村（美益兴葡萄）
山东省博兴县锦秋街道湾头村（草柳编工艺品）
山东省乐陵市云红街道（乐陵金丝小枣）
山东省东营市垦利区胜坨镇小张村（面包小麦）
河南省汤阴县韩庄乡南张贾村(有机果蔬)
河南省济源市承留镇玉阳村(玉阳山核桃)
河南省濮阳县胡状乡炉里村(蔬菜)
河南省巩义市小关镇南岭新村(核桃)
河南省舞钢市尚店镇王庄村(乡村旅游)
河南省潢川县踅孜镇淮南村(淮籣翠芽)
河南省南乐县张果屯乡烟之东村（淼富草莓）
河南省郸城县秋渠乡于寨村（芹菜）
河南省西峡县双龙镇(西峡香菇)
湖北省武汉市蔡甸区侏儒山街金鸡村（蔡甸藜蒿）
湖北省武汉市新洲区李集街张集村（李集香葱）
湖北省宜都市高坝洲镇（宜都蜜柑）
湖北省枣阳市新市镇（新市鲜桃）
湖北省枝江县七星台镇（七星台蒜薹）
湖北省松滋市万家乡邓家铺村（松滋柑桔）
湖北省江陵县三湖管理区新建大队（三湖黄桃）
湖北省建始县花坪镇村坊村（关口葡萄）
湖北省孝昌县周巷镇（周巷凤凰茶）
湖北省红安县二程镇（红安苕）
湖北省咸丰县高乐山镇沙坝村（长青茶叶）
湖北省荆门市东宝区牌楼镇来龙村（蔬菜）
湖北省通山县南林桥镇石门村（莲藕）
湖北省崇阳县天城镇茅井村（太空莲）
湖北省谷城县石花镇（花卉苗木）
湖南省浏阳市高坪镇高坪社区（茄子）
湖南省长沙县金井镇湘丰村（湘丰绿茶）
湖南省茶陵县高陇镇石冲村（石冲脐橙）
湖南省岳阳市君山区钱粮湖镇马颈河村（三封辣椒）
湖南省湘阴县樟树镇文谊新村（樟树港辣椒）
湖南省新邵县大新镇栗滩社区（药用玫瑰）
湖南省道县上关街道办事处向阳村（道州脐橙）
湖南省龙山县兴隆街道办事处白岩洞村（龙山百合）
湖南省保靖县清水坪镇客寨村（保靖黄金茶）
湖南省资兴市清江镇（东江湖蜜桔）
湖南省沅陵县陈家滩乡（五强溪鱼）
广东省仁化县红山镇鱼皇村（丹霞红红茶）
广东省肇庆市高要区活道镇仙洞村（活道粉葛）
广东省陆丰市博美镇赤坑村（萝卜）
广东省东源县船塘镇（板栗）
广东省茂名市电白区水东镇（水东芥菜）
广东省怀集县坳仔镇（怀集茶杆竹）
广西壮族自治区苍梧县六堡镇塘平村（六堡茶）
广西壮族自治区灵川县海洋乡小平乐村（桃）
广西壮族自治区武宣县桐岭镇和律村（哈密瓜）
广西壮族自治区贵港市覃塘区覃塘镇龙凤村（覃塘莲藕）
广西壮族自治区南宁市良庆区南晓镇那敏村（荔枝）
广西壮族自治区全州县绍水镇（双孢蘑菇）
广西壮族自治区荔浦县修仁镇（砂糖桔）
广西壮族自治区永福县龙江乡（永福罗汉果）
广西壮族自治区柳城县东泉镇柳城华侨农场（柳城蜜桔）
海南省昌江黎族自治县海尾镇五大村（哈蜜瓜）
海南省文昌市会文镇（星月佛珠）
海南省海口市琼山区三门坡镇（荔枝）
海南省文昌市会文镇边海村（石斑鱼）
重庆市北碚区静观镇中华村（中华糯小米）
重庆市巴南区鱼洞街道百胜村（鱼洞乌皮樱桃）
重庆市合川区小沔镇盛泉村（小米花生）
重庆市涪陵区南沱镇治坪村（竹笋）
重庆市酉阳土家族苗族自治县花田乡何家岩村（酉阳贡米）
重庆市奉节县朱衣镇砚瓦村（奉节脐橙）
重庆市江津区石门镇李家村（晚熟柑橘）
重庆市永川区大安街道花果山村（永川秀芽）
重庆市九龙坡区陶家镇治安村（花椒）
重庆市渝北区石船镇胜天村（桃子）
重庆市綦江区石壕镇（花坝糯玉米）
重庆市梁平区虎城镇（虎城尖柚）
重庆市垫江县坪山镇人民政府（涪地特榨菜）
四川省都江堰市胥家镇金胜社区（都江堰猕猴桃）
四川省邛崃市夹关镇龚店村（邛崃黑茶）
四川省罗江县蟠龙镇宝峰村（罗江贵妃枣）
四川省德阳市旌阳区东湖乡高槐村（乡村旅游）
四川省绵阳市涪城区关帝镇清水村（青花椒）
四川省遂宁市安居区常理镇大洞村（安居黄金梨）
四川省资中县骝马镇三柏村（资中血橙）
四川省夹江县三洞镇建新村（茶叶）
四川省丹棱县顺龙乡幸福村（红雅顶脆红李）
四川省康定市姑咱镇达杠村（达杠苹果）
四川省黑水县知木林乡维多村（核桃）
四川省马尔康市梭磨乡砍竹村（蔬菜）
四川省自贡市贡井区五宝镇（五宝花生）
四川省盐边县惠民乡（盐边桑椹）
四川省江油市新安镇（农业公园）
四川省叙永县水潦彝族乡（赤水河甜橙）
四川省古蔺县桂花乡（古蔺赶黄草）
四川省苍溪县运山镇（苍溪雪梨）
四川省隆昌县普润镇（特色水产）
贵州省沿河土家族自治县中寨镇中寨村（沿河山羊）
贵州省湄潭县永兴镇马义村（星叶绿茶叶）
贵州省正安县和溪镇大坎村（千秋汇红橙）
贵州省独山县影山镇黄桥村（葡萄）
贵州省龙里县湾滩河镇园区村（龙里豌豆尖）
贵州省普定县猫洞乡猫洞村（朵贝茶）
贵州省沿河土家族自治县沙子街道（沙子空心李）
云南省勐海县勐宋乡三迈村委会南本老寨村（古树茶）
云南省永平县龙门乡大坪坦村（大坪坦茶叶）
云南省南涧县小湾东镇岔江村（南洞无量山乌骨鸡）
云南省芒市轩岗乡芒棒村（沙糖桔）
云南省罗平县鲁布革乡舌坡村（罗非鱼）
云南省德钦县云岭乡斯农村（葡萄）
云南省双柏县法脿镇法甸村（白竹山茶）
云南省西盟县勐卡镇永邦村（西盟米荞）
云南省华坪县石龙坝镇（华坪芒果）
云南省华宁县盘溪镇（华宁柑桔）
西藏自治区曲松县曲松镇琼嘎村（藏药材）
西藏自治区贡觉县莫洛镇幸福村（昌都阿旺绵羊）
西藏自治区林芝市巴宜区更章门巴民族乡久巴村（草莓）
西藏自治区隆子县隆子镇（隆子黑青稞糌粑）
陕西省西安市临潼区斜口街办房河村（临潼石榴）
陕西省韩城市芝阳镇马村（韩城大红袍花椒）
陕西省宝鸡市陈仓区凤阁岭镇通关河村（苹果）
陕西省榆林市横山区双城办事处王梁村（横山羊肉）
陕西省咸阳市杨凌区五泉镇汤家村（蔬菜）
陕西省洋县纸坊街道办草坝村(梨)
陕西省铜川市耀州区锦阳路街办水峪村(苹果)
陕西省武功县普集镇社区董家村(猕猴桃)
陕西省子长县余家坪镇新寨河村(大棚油桃)
陕西省岚皋县蔺河镇蒋家关村（岚皋魔芋）
陕西省山阳县延坪镇枫树村（延坪绿茶）
陕西省镇坪县华坪镇团结村（镇坪黄连）
陕西省西安市阎良区关山镇北冯村（阎良甜瓜）
陕西省扶风县天度镇（苹果）
陕西省留坝县玉皇庙镇(留坝黑木耳)
陕西省渭南市华州区瓜坡镇(蔬菜)
陕西省米脂县杨家沟镇(米脂小米)
陕西省丹凤县棣花镇(丹凤葡萄)
陕西省合阳县黑池镇(合阳红薯)
甘肃省皋兰县什川镇长坡村（皋兰软儿梨）
甘肃省敦煌市月牙泉镇月牙泉村（敦煌李广杏）
甘肃省天水市秦州区四十铺村（花牛苹果）
甘肃省庄浪县万泉镇邵坪村（苹果）
甘肃省陇西县首阳镇南门村（黄芪）
甘肃省瓜州县西湖乡西湖村（瓜州密瓜）
甘肃省武威市凉州区羊下坝镇（诚坤蔬菜）
甘肃省庆城县白马铺镇（苹果）
甘肃省永昌县焦家庄乡（永昌胡萝卜）
青海省大通回族土族自治县黄家寨镇阿家村（大通鸡腿葱）
青海省湟中县多巴镇玉拉村（葡萄）
青海省大通回族土族自治县向化乡立树尔村（藏香猪）
青海省互助县巴扎乡元莆沟村（白牦牛）
青海省民和县中川乡前进村（蔬菜）
青海省河南县柯生镇尖克村（欧拉羊）
宁夏回族自治区贺兰县洪广镇金山村（金山羊）
宁夏回族自治区吴忠市利通区上桥镇牛家坊村（休闲农业）
宁夏回族自治区中卫市沙坡头区常乐镇罗泉村（香山硒砂）
宁夏回族自治区西吉县马莲乡张堡塬村（西吉马铃薯）
宁夏回族自治区盐池县王乐井乡牛记圈村（盐池滩羊肉）
宁夏回族自治区贺兰县常信乡（淡水鱼）
宁夏回族自治区青铜峡市叶盛镇（地三贡米）
新疆维吾尔自治区巩留县阿尕尔森镇沙尔乌泽克村（三香红苹果）
新疆维吾尔自治区伊宁县阿乌利亚乡阿乌利亚村（民族刺绣）
新疆维吾尔自治区察布查尔县扎库齐牛录乡查干布拉克村（罗马甘菊）
新疆维吾尔自治区昌吉市滨湖镇东沟村（蔬菜）
新疆维吾尔自治区玛纳斯县包家店镇马家庄村（苹果）
新疆维吾尔自治区青河县阿热勒乡阔布村（驴）
新疆维吾尔自治区布尔津县窝依莫克镇托库木特村（休闲旅游）
新疆维吾尔自治区布鄯善县连木沁镇尤库日买里村（葡萄）
新疆维吾尔自治区且末县库拉木勒克乡巴什克其克村（大蒜）
新疆生产建设兵团第二师三十六团（子母河红枣）
新疆生产建设兵团第八师一四三团八连（石河子一四三团蟠桃）
新疆生产建设兵团第八师一二一团二十二连（克瑞森葡萄）

## Sheet: 6
第六批全国一村一品示范村镇监测合格名单
北京市房山区窦店镇河口村（翠林花海辣椒）
北京市顺义区龙湾屯镇柳庄户村（翠柳葡萄）
北京市大兴区长子营镇东北台村（凤河源油菜）
北京市平谷区南独乐河镇北寨村（北寨红杏）
北京市密云区河南寨镇套里村（村里头番茄）
北京市延庆区沈家营镇河东村（葡语农庄葡萄）
北京市昌平区阳坊镇后白虎涧村（白虎涧京白梨）
北京市门头沟区妙峰山镇涧沟村（妙峰玫瑰）
北京市通州区漷县镇柏庄村（四时鲜生菜）
北京市延庆区香营乡新庄堡村（鲜食杏）
天津市宝坻区大钟庄镇牛庄子村（葫芦）
天津市武清区汊沽港镇西肖庄村（西肖庄紫薯）
天津市宁河区廉庄子乡杨拨村（骄杨西红柿）
天津市宁河区东棘坨镇艾林村（志田西瓜）
天津市滨海新区中塘镇马圈村（茶树菇）
河北省唐县南店头乡葛堡村（肉羊）
河北省河间市龙华店镇兴隆店村（梨）
河北省固安县温泉园区南王起营村（花木）
河北省魏县魏城镇董河下村（魏县鸭梨）
河北省宽城满族自治县化皮溜子乡西岔沟村（西富苹果）
河北省唐山市曹妃甸区第七农场（曹妃甸湿地蟹）
河北省隆尧县牛家桥乡梅庄村（“隆红蜜”牌苹果）
河北省平山县孟家庄镇元坊村（“元坊”牌苹果）
河北省深泽县白庄乡孤庄村（半夏）
河北省张家口市宣化区春光乡观后村（宣化牛奶葡萄）
河北省安平县马店镇（圆隆白山药）
河北省秦皇岛市山海关区石河镇（贡仙樱桃）
山西省古交市邢家社乡龙子村（净苑蔬菜）
山西省清徐县柳杜乡成子村（蔬菜）
山西省左云县店湾镇范家寺村（西红柿、黄瓜）
山西省长治县振兴新区振兴村（休闲农业）
山西省阳泉市盂县路家村镇庄只上村（核桃）
山西省吉县东城乡柏东村（吉县苹果）
山西省临猗县庙上乡张庄村（冬枣）
内蒙古自治区鄂温克族自治旗巴彦塔拉达斡尔民族乡伊兰嘎查（达瓦苏荣牛肉干）
内蒙古自治区察右后旗乌兰哈达苏木七倾地村（后旗红马铃薯）
内蒙古自治区达拉特旗树林召镇林原村（保善堂蔬菜）
内蒙古自治区呼和浩特市赛罕区金河镇根堡村（绿联油葫芦）
内蒙古自治区巴林左旗十三敖包镇房身村（东傲笤帚）
内蒙古自治区土默特右旗沟门镇西湾村（沟门苗木）
内蒙古自治区乌兰浩特市义勒力特镇黄家店嘎查（义勒力特大米）
内蒙古自治区乌审旗嘎鲁图镇布寨嘎查（鄂尔多斯细毛羊）
内蒙古自治区乌拉特前旗先锋镇（富煌枸杞）
辽宁省绥中县大王庙镇水泉沟村（绥中白梨）
辽宁省盖州市二台乡石棚山村（御佳苹果）
辽宁省绥中县高岭镇老爷庙村（大根萝卜）
辽宁省灯塔市西马峰镇（沾露青椒）
辽宁省盖州市九寨镇（营星月油桃）
吉林省农安县靠山镇卧牛石村（红石砬小米）
吉林省榆树市于家镇三道村（蓝河坝稻米）
吉林省永吉县西阳镇马鞍山村（罗圈沟葡萄）
吉林省龙井市老头沟镇宝兴村（龙兴宝苹果梨）
吉林省通化县光华镇光华村（禾韵蓝莓）
吉林省东丰县小四平镇古年村（鹿乡金红苹果）
吉林省公主岭市响水镇湾龙村（响水湾龙蔬菜）
吉林省梅河口市双兴镇德庆村（原森黑木耳）
黑龙江省巴彦县丰乐乡春生村（狐貉獭兔）
黑龙江省哈尔滨市道外区民主镇胜利村（湿地旅游）
黑龙江省拜泉县大众乡长征村（香瓜）
黑龙江省齐齐哈尔市建华区高峰村（大葱）
黑龙江省克山县双河镇中心村（克山马铃薯）
黑龙江省东宁市道河镇土城子村（东宁黑木耳）
黑龙江省牡丹江市阳明区庆丰村（杂粮）
黑龙江省勃利县勃利镇蔬菜村（勃利葡萄）
黑龙江省鸡西市滴道区兰岭乡新立村（新立韭菜）
黑龙江省哈尔滨市双城区永治街道办事处（设施蔬菜）
上海市浦东新区泥城镇马厂村（红刚青扁豆）
江苏省宜兴市湖㳇镇张阳村（张阳花卉）
江苏省常州市武进区洛阳镇阳湖村（苏常鲜葡萄）
江苏省南通市通州区二甲镇路中村（威奇太保蔬菜）
江苏省东海县桃林镇北芹村（北芹口西葫芦）
江苏省宝应县泾河镇松竹村（果蔬）
江苏省句容市后白镇西冯村（西冯草坪）
江苏省如皋市江安镇联络新社区（肉制品）
江苏省江阴市顾山镇红豆村（金顾山水蜜桃）
江苏省仪征市真州镇佐安村（康大葡萄）
江苏省镇江市丹徒区上党镇敖毅村（尚香黄桃）
江苏省南京市浦口区汤泉街道(“汤泉”牌苗木)
江苏省徐州市贾汪区大泉街道（休闲农业）
江苏省邳州市铁富镇（邳州银杏）
浙江省杭州市余杭区中泰街道紫荆村（中泰竹笛）
浙江省平阳县水头镇新联村（平阳黄汤茶）
浙江省安吉县灵峰镇剑山村（剑山砂梨）
浙江省天台县石梁镇（天台山云雾茶）
浙江省宁海县深甽镇望海岗村（第一泉茶叶）
浙江省宁海县黄坛镇里天河村（双峰香榧）
安徽省巢湖市中垾镇小联圩村（中垾番茄）
安徽省桐城市龙眠街道凤形村（小花茶叶）
安徽省池州市贵池区棠溪镇西山村（西山焦枣）
安徽省绩溪县上庄镇余川村（茶叶）
安徽省祁门县平里镇贵溪村（祁门红茶）
安徽省临泉县杨小街镇王新村（蔬菜）
安徽省萧县酒店镇西赵楼村（西瓜）
安徽省枞阳县麒麟镇新安村（苗木）
安徽省凤阳县小溪河镇小岗村（休闲农业）
安徽省广德县四合镇太平村（乌松岭茶叶）
安徽省宿松县柳坪乡邱山村（松柳河茶叶）
安徽省霍山县太平畈乡（霍山石斛）
安徽省无为县泉塘镇（无为螃蟹）
福建省永定县仙师镇务田村（永定六月红早熟芋）
福建省政和县镇前镇半源村（翡翠灵芽）
福建省安溪县长坑镇山格村（山格淮山）
福建省邵武市桂林乡（邵武笋干）
福建省上杭县下都镇（下都沙田柚）
江西省新余市仙女湖风景区仰天岗办事处湖陂村（湖陂葡萄）
江西省上犹县梅水乡园村村（犹江绿月茶）
江西省靖安县高湖镇古楠村（古楠村大米）
江西省瑞昌市高丰镇青丰村（瑞昌山药）
江西省余干县三塘乡明湖村（芡实）
江西省抚州市临川区连城乡下庄村（抚州西瓜）
江西省萍乡市湘东区麻山镇麻山村（葡萄）
江西省浮梁县西湖乡（浮梁茶）
江西省新干县三湖镇（三湖红桔）
江西省安义县长均乡（蔬菜）
山东省诸城市桃林镇山东头村（怡明绿茶）
山东省郓城县李集镇梁楼村（芦笋）
山东省冠县兰沃乡韩路村（冠县鸭梨）
山东省烟台市回里镇善疃村（“回里”牌苹果）
山东省无棣县海丰街道办事处大齐村（大齐黄金杏）
山东省栖霞市桃村镇国路夼村（国路夼红大樱桃）
山东省荣成市城西河西村（荣成苹果）
山东省东明县陆圈镇马军营村（蔬菜）
山东省乐陵县杨安镇（“飘”牌调味品）
山东省巨野县陶庙镇（大蒜）
山东省沂源县张家坡镇（沂源苹果）
山东省济阳县曲堤镇（曲堤黄瓜）
山东省山东莘县河店镇（莘绿香瓜）
山东省汶上县白石镇（核桃）
山东省费县胡阳镇（胡阳西红柿）
山东省广饶县大王镇（蔬菜）
山东省嘉祥县满硐镇（辣椒）
山东省莒县库山乡（莒县丹参、黄芩）
山东省枣庄市山亭区冯卯镇（仙玉莲油桃）
山东省微山县高楼乡（微山湖河蟹）
山东省蓬莱市大辛店镇（苹果）
山东省青州市王坟镇（青州山楂）
山东省青岛市黄岛区灵珠山街道办事处（休闲农业）
山东省平度市云山镇（云山大樱桃）
河南省博爱县寨豁乡小底村（樱桃）
河南省商丘市睢阳区五里杨村（西瓜）
河南省禹州市古城镇关岗村（红薯三粉）
河南省永城市城厢乡冯寨村（冯寨肉牛）
河南省新蔡县余店镇东王庄村（有机蔬菜）
河南省南乐县谷金楼镇东邵郭村（苹果）
河南省沈丘县纸店镇卢庄村（冬枣）
河南省光山县晏河乡付店村（茶叶）
河南省西平县盆尧镇于营村（黄瓜、番茄）
河南省上蔡县邵店镇（邵店黄姜）
河南省辉县市冀屯镇（鑫菌菇类）
河南省信阳市浉河区十三里桥乡（苗木花卉）
河南省林州市茶店镇（太行菊）
河南省南召县云阳镇（苗木花卉）
湖北省咸宁市咸安区汀泗桥镇黄荆塘村（咸安砖茶）
湖北省通山县南林桥镇石垅村（小龙虾）
湖北省恩施州咸丰县丁寨乡春沟村（苗木花卉）
湖北省恩施州来凤县漫水乡油房坳村（茂森缘油茶）
湖北省仙桃市长埫口镇武旗村（武旗湾毛豆）
湖北省钟祥市张集镇王河村（钟祥香菇）
湖北省宜昌市夷陵区乐天溪镇石洞坪村（宜昌木姜子）
湖北省南漳县巡检镇峡口村（峡口柑桔）
湖北省潜江市熊口镇赵脑村（虾小弟小龙虾）
湖北省松滋市八宝镇胜利村（滋宝西瓜）
湖北省麻城市宋埠镇彭店村（麻城辣椒）
湖北省武汉市蔡甸区侏儒山街薛山村（蔡甸藜蒿）
湖北省宜都市王家畈镇（宜都宜红茶）
湖北省洪湖市沙口镇（洪湖再生稻）
湖北省赤壁市官塘驿镇（有机猕猴桃）
湖北省安陆市巡店镇（安陆白花菜）
湖南省茶陵县湖口镇小潭村（红薯）
湖南省洞口县水东镇高新村（食用菌）
湖南省保靖县葫芦镇枫香村（保靖黄金茶）
湖南省张家界市永定区尹家溪镇长茂山村（鲜桃）
湖南省沅江市草尾镇民主村（洋蒜苗）
湖南省冷水江市铎山镇眉山村（锦绣嵋山葡萄）
湖南省株洲县龙门镇李家村（蔬菜）
湖南省长沙市浏阳市大围山镇（大围山梨）
湖南省祁东县黄土铺镇（祁东黄花菜）
湖南省桃源县茶庵铺镇（桃源野茶王）
湖南省永顺县高坪乡（鸿丰猕猴桃）
广东省大埔县百侯镇侯北村（大埔蜜柚）
广东省郁南县宝珠镇庞寨村（庞寨黑叶荔枝）
广东省揭西县五经富镇五新村（茶叶）
广东省新丰县黄磜镇（新丰佛手瓜）
广东省化州市平定镇（化橘红）
广东省怀集县梁村镇（西瓜）
广东省恩平市牛江镇（马铃薯）
广西壮族自治区凌云县加尤镇百陇村（凌云白毫茶）
广西壮族自治区南丹县芒场镇巴平村（南丹巴平米）
广西壮族自治区田东县林逢镇东养村（百色芒果）
广西壮族自治区灌阳县新圩镇合睦村（黑李、雪梨）
广西壮族自治区灵山县平南镇桃禾村（茶叶）
广西壮族自治区容县灵山镇旺维村（清香蜜桔）
广西壮族自治区西林县足别瑶族苗族乡央龙村（足龙茶）
广西壮族自治区钦州市钦南区那丽镇殿艮村（辣椒、黄瓜）
广西壮族自治区那坡县百南乡上隆村（西贡蕉）
广西壮族自治区富川县古城镇高路村（富香壹佰有机大米）
广西壮族自治区忻城县城关镇尚宁村（百香果）
海南省昌江黎族自治县十月田镇姜园村（圣女果）
海南省澄迈县桥头镇沙土村（桥头地瓜）
海南省陵水黎族自治县光坡镇武山村（陵水圣女果）
重庆市渝北区大湾镇太和村（淡水鱼）
重庆市渝北区茨竹镇大面坡村（青椒）
重庆市綦江区石壕镇万隆村（花坝糯玉米）
重庆市南川区庆元乡飞龙村（南川鸡）
重庆市梁平县屏锦镇腰塘村（“雨雷”牌鸡蛋）
重庆市城口县坪坝镇光明村（红心猕猴桃）
重庆市万州区孙家镇兰草村（三峡佛印茶）
重庆市云阳县农坝镇云峰村（云阳乌天麻）
重庆市石柱县龙沙镇永丰村（石柱红辣椒）
重庆市云阳县养鹿镇（云阳晚橙）
重庆市江津区先锋镇（江津花椒）
四川省成都市青白江区福洪镇杏花村（福洪杏）
四川省蒲江县成佳镇同心村（蒲江雀舌）
四川省绵阳市游仙区凤凰乡木龙村（木龙观胡萝卜）
四川省旺苍县木门镇三合村（广元黄茶）
四川省青川县青溪镇阴平村（休闲农业）
四川省沐川县炭库乡石碑村（茶叶）
四川省阆中市方山镇雪洞村（雪洞生姜）
四川省高县大窝镇大屋村（早白尖绿茶）
四川省达州市达川区米城乡尖山庙村（米城大米）
四川省洪雅县中山乡前锋村（雅雨露茶叶）
四川省汶川县雁门乡芤山村（汶川甜樱桃）
四川省金阳县芦稿镇油房村（金阳青花椒）
四川省自贡市贡井区建设镇（贡井龙都早香柚）
四川省绵阳市三台县花园镇（涪城麦冬）
四川省内江市东兴区田家镇（紫皮大蒜）
四川省华蓥市禄市镇（广安蜜梨）
四川省雅安市雨城区合江镇（雅安藏茶）
贵州省印江自治县缠溪镇湄坨村（梵净山茶）
贵州省长顺县鼓扬镇鼓扬村（长顺绿壳蛋鸡）
贵州省兴义市泥凼镇老寨村（苦丁茶）
贵州省关岭自治县坡贡镇凡化村（坡贡小黄姜）
贵州省威宁县麻乍镇双胞塘村（辣椒）
贵州省贵阳市乌当区百宜镇罗广村（罗广红香米）
贵州省金沙县清池镇普安村（大方天麻）
贵州省石阡县聚凤仡佬族侗族乡指甲坪村（石阡苔茶）
贵州省岑巩县注溪镇（思州柚）
贵州省江口县闵孝镇（梵乡提红葡萄）
云南省建水县甸尾乡铁所村（美秀福新马铃薯）
云南省勐海县布朗山乡班章村（复原昌号有机茶）
云南省沧源县勐董镇芒摆村（碧丽源有机茶）
云南省永胜县六德乡营山村（他留乌骨鸡）
云南省文山市坝心乡他披村（文山他披梨）
云南省云龙县宝丰乡大栗树村（云龙绿茶）
云南省漾濞县苍山西镇光明村（漾濞大波核桃）
云南省师宗县高良乡科白村（高良薏仁）
云南省盐津县敦厚村（盐津乌骨鸡)
云南省罗平县板桥镇（罗平小黄姜）
云南省大姚县三台乡（大姚核桃）
云南省昭通市昭阳区苏家院镇（昭通苹果）
西藏自治区那曲县罗玛镇4村（畜产品）
西藏自治区达孜县雪乡扎西岗村（“布塑”面具）
西藏自治区拉萨市蔡公堂乡白定村（果蔬）
西藏自治区左贡县旺达镇木龙村（古琼藏香）
西藏自治区加查县冷达乡嘎玛吉塘村（蓝莓）
西藏自治区扎囊县扎其乡申藏村（木雕工艺品）
西藏自治区琼结县加麻乡白松村（半细绵羊）
陕西省神木县贺家川镇温家川村（果蔬）
陕西省宝鸡市金台区马家原村（马家原葡萄）
陕西省南郑县牟家坝镇云峰寺村（绿茶）
陕西省铜川市王益区王益街道办塬畔村（大樱桃、草莓）
陕西省咸阳市渭城区周陵社区严家沟村（葡萄）
陕西省华阴市华西镇北洛村（红提）
陕西省韩城市桑树坪镇王峰村（韩城大红袍花椒）
陕西省户县草堂镇叶寨村（户县葡萄）
陕西省礼泉县昭陵社区前山村（石榴）
陕西省紫阳县焕古镇焕古村（紫阳富硒茶）
陕西省镇安县达仁镇象园村（镇安象园茶）
陕西省渭南市临渭区向阳办赤水村（大樱桃）
陕西省城固县三合镇陈丁村（蔬菜）
陕西省宝鸡市陈仓区慕仪镇（四季佳禾蔬菜）
陕西省澄城县庄头镇（真仕佳大樱桃）
陕西省洛川县永乡镇（甘甜心苹果）
陕西省周至县马召镇（周至猕猴桃）
陕西省洛南县石门镇（洛南核桃）
陕西省汉中市汉台区铺镇（蔬菜）
陕西省榆林市榆阳区鱼河镇（时令水果）
甘肃省礼县永兴镇捷地村（礼县苹果）
甘肃省天水市秦州区玉泉镇烟铺村（大樱桃）
甘肃省泾川县红河乡柳王村（番茄）
甘肃省永昌县水源镇方沟村（设施农业）
甘肃省陇西县云田镇安家咀村（陇原裕新菌菜）
甘肃省会宁县头寨子镇牛河村（甘富苹果）
甘肃省徽县嘉陵镇田河村（徽县银杏）
甘肃省景泰县五佛兴水村（红枣）
甘肃省陇南市武都区郭河乡（陇南花椒）
青海省西宁市城西区彭家寨镇火西村（鸡蛋）
青海省大通县朔北乡代同庄村（老爷山甘蓝）
青海省湟源县日月乡山根村（山根马蘭青蒜苗）
青海省互助县台子乡哇麻村（葱花土鸡）
青海省海东市乐都区中坝乡何家山村（乐都藏香猪）
青海省海东市乐都区李家乡西马营村（乐都洋芋）
青海省贵德县尕让乡二连村（辣椒）
青海省玛多县花石峡镇日谢村（玛多藏羊）
宁夏回族自治区银川市兴庆区掌政镇镇河村（番茄）
宁夏回族自治区盐池县麻黄山乡包源村（盐池荞麦、糜子、谷子）
宁夏回族自治区海原县关庄乡关庄村（海原马铃薯）
宁夏回族自治区西吉县将台乡明荣村（朔绿源西芹）
宁夏回族自治区彭阳县古城镇任河村（雪花牛肉）
宁夏回族自治区泾源县兴盛乡上金村（泾源肉牛）
宁夏回族自治区沙坡头区香山乡（香山压砂西瓜）
新疆维吾尔自治区乌鲁木齐县水西沟镇东湾村(草莓)
新疆维吾尔自治区吐鲁番市高昌区亚尔镇亚尔果勒村（坎儿园葡萄）
新疆维吾尔自治区木垒县东城镇沈家沟村（木垒鹰嘴豆）
新疆维吾尔自治区特克斯县乔拉克铁热克镇阿克铁热克村（特克斯苹果）
新疆维吾尔自治区富蕴县可可托海镇塔拉特村（黑加仑）
新疆维吾尔自治区阿克苏市库木巴什镇托万克喀日纳斯村（可口可富核桃）
新疆维吾尔自治区阿克陶县皮拉勒乡墩都拉村（帕米尔水晶绿甜瓜）
新疆维吾尔自治区泽普县古勒巴格乡阿热买里村（核桃）
新疆维吾尔自治区沙雅县海楼镇（红枣）
新疆维吾尔自治区阿克陶县巴仁乡（巴仁杏子）
新疆生产建设兵团第二师33团（塔里木垦区马鹿茸）
新疆生产建设兵团第四师69团（“香极地”天然香料）
新疆生产建设兵团第八师121团13连（甜瓜）
新疆生产建设兵团第八师134团24连（大樱桃）
新疆生产建设兵团第八师141团15连（设施蔬菜）

## Sheet: 前6批
前六批全国一村一品示范村镇监测合格名单
北京市门头沟区军庄镇孟悟村（孟悟京白梨）
北京市门头沟区妙峰山镇涧沟村（妙峰玫瑰）
北京市门头沟区王平镇西马各庄村（西马樱桃）
北京市门头沟区雁翅镇泗家水村（泗家水香椿）
北京市门头沟区雁翅镇太子墓村（红富士苹果）
北京市房山区大石窝镇南河村（南河蔬菜）
北京市房山区窦店镇窦店村（窦店肉牛）
北京市房山区窦店镇河口村（翠林花海辣椒）
北京市房山区窦店镇芦村（燕都泰华蔬菜）
北京市房山区长沟镇北甘池村（胜龙泉薄皮核桃）
北京市房山区长阳镇夏场村（夏家场葡萄）
北京市房山区张坊镇（磨盘柿）
北京市通州区漷县镇柏庄村（四时鲜生菜）
北京市通州区永乐店镇孔庄村（永恒瑞泉食用菌）
北京市顺义区北务镇仓上村（绿中名辣椒）
北京市顺义区北务镇小珠宝村（小珠宝西瓜）
北京市顺义区李遂镇后营村（绿之源蔬菜）
北京市顺义区龙湾屯镇柳庄户村（翠柳葡萄）
北京市顺义区南彩镇河北村（樱桃）
北京市顺义区赵全营镇北郎中村（花卉）
北京市昌平区崔村镇真顺村（真顺苹果）
北京市昌平区兴寿镇香屯村（翼寿草莓）
北京市昌平区阳坊镇后白虎涧村（白虎涧京白梨）
北京市大兴区礼贤镇东段家务村（礼贤益农番茄）
北京市大兴区庞各庄镇梨花村（梨）
北京市大兴区青云店镇孝义营村（孝心馒头）
北京市大兴区魏善庄镇李家场村（李家场香菇）
北京市大兴区长子营镇东北台村（凤河源油菜）
北京市大兴区长子营镇河津营村（凤河源生菜）
北京市大兴区长子营镇小黑垡村（九五肉鸽）
北京市大兴区庞各庄镇（京庞西瓜）
北京市怀柔区渤海镇六渡河村（板栗）
北京市怀柔区怀柔镇芦庄村（芦庄葫芦）
北京市怀柔区庙城镇王史山村（中菌食用菌）
北京市怀柔区杨宋镇梭草村（梭草鲟鱼）
北京市平谷区大兴庄镇西柏店村（柏店二仙食用菊花）
北京市平谷区马昌营镇王各庄村（诺亚有机蔬菜）
北京市平谷区南独乐河镇北寨村（北寨红杏）
北京市平谷区夏各庄镇杨各庄村（元昇西红柿）
北京市平谷区峪口镇西凡各庄村（正大蛋鸡）
北京市平谷区镇罗营镇（乐逍遥蜜梨）
北京市平谷区刘家店镇（大桃）
北京市密云区河南寨镇套里村（村里头番茄）
北京市密云区穆家峪镇庄头峪村（红香酥梨）
北京市密云区太师屯镇太师庄村（太师庄设施蔬菜）
北京市密云区溪翁庄镇金叵罗村（金叵罗小米）
北京市密云区新城子镇蔡家甸村（云岫苹果）
北京市延庆区沈家营镇河东村（葡语农庄葡萄）
北京市延庆区香营乡新庄堡村（鲜食杏）
北京市延庆区八达岭镇里炮村（苹果）
北京市延庆区旧县镇大柏老村（生鲜牛乳）
北京市延庆区康庄镇小丰营村（北菜园蔬菜）
北京市延庆区延庆镇唐家堡村（金粟丰润葡萄）
北京市延庆区张山营镇前黑龙庙村（前龙葡萄）
天津市西青区辛口镇毕家村（沁美冬瓜）
天津市西青区辛口镇小沙窝村（萝卜）
天津市北辰区双口镇岔房子村（岔房子山药）
天津市北辰区双口镇徐堡村（大枣）
天津市武清区白古屯镇东马房村（雍阳豆腐丝）
天津市武清区汊沽港镇胡柳子村（胡柳子葡萄）
天津市武清区汊沽港镇西肖庄村（西肖庄紫薯）
天津市武清区大良镇田水铺村（小兔拔拔青萝卜）
天津市武清区梅厂镇灰锅口村（曙春葡萄）
天津市武清区大良镇后赶庄村（西红柿）
天津市宝坻区八门城镇欢喜庄村（八门城稻米）
天津市宝坻区大钟庄镇大米庄村（一兰梓大蒜）
天津市宝坻区大钟庄镇牛庄子村（葫芦）
天津市宝坻区方家庄镇北马营村（绿野西红柿）
天津市滨海新区太平镇崔庄村（冬枣）
天津市滨海新区杨家泊镇付庄村（杨家泊对虾）
天津市宁河区东棘坨镇艾林村（辣椒）
天津市宁河区廉庄子乡杨拨村（骄杨西红柿）
天津市宁河区板桥镇赵学村（赵学西红柿）
天津市宁河区廉庄镇岳道口村（双孢菇）
天津市宁河区潘庄镇齐心庄村（香菇）
天津市宁河区岳龙镇小闫庄村（龙闫西红柿）
天津市静海区陈官屯镇西钓台村（绿冬蔬菜）
天津市静海区台头镇义和村（台头西瓜）
天津市蓟州区出头岭镇中峪村（香菇）
天津市蓟州区官庄镇梁后庄村（红果）
河北省石家庄市矿区贾庄镇天户峪村（昊源苹果）
河北省石家庄市鹿泉区李村镇邓庄村（康态中华鳖）
河北省石家庄市辛集市旧城镇杏园村（杏园鸭梨）
河北省石家庄市晋州市马于镇北辛庄村（鸭梨）
河北省石家庄市深泽县白庄乡孤庄村（半夏）
河北省石家庄市深泽县铁杆镇杜社村（杜社紫玉葡萄）
河北省石家庄市平山县孟家庄镇元坊村（“元坊”牌苹果）
河北省石家庄市元氏县北正乡时家庄村（满山红石榴）
河北省唐山市曹妃甸区第七农场（曹妃甸湿地蟹）
河北省唐山市遵化市平安城镇（宝伞香菇）
河北省唐山市滦南县姚王庄镇（青河沿甘蓝）
河北省唐山市乐亭县胡家坨镇大黑坨村（黄瓜、甜瓜）
河北省唐山市乐亭县中堡镇（青健设施果菜）
河北省秦皇岛市山海关区石河镇（贡仙樱桃）
河北省秦皇岛市北戴河区戴河镇北戴河村（集发蔬菜）
河北省秦皇岛市抚宁区茶棚乡小黄金山村（茶棚番茄）
河北省秦皇岛市昌黎县城郊区郝宋庄村（一月一草莓）
河北省秦皇岛市卢龙县蛤泊乡鲍子沟村（葡萄）
河北省秦皇岛市秦青龙满族自治县青龙镇大石门村（燕之龙板栗）
河北省邯郸市肥乡区辛安镇前白落堡村（富乡圆葱）
河北省邯郸市永年区广府镇后当头村（永年大蒜）
河北省邯郸市大名县孙甘店乡南石冲村（花生）
河北省邯郸市馆陶县柴堡镇东苏堡村（艾格兰鸡蛋）
河北省邯郸市魏县魏城镇董河下村（魏县鸭梨）
河北省邯郸市曲周县曲周镇东牛屯村（三棵树时令鲜蔬）
河北省邢台市沙河市綦村镇西苏庄村（薄皮核桃）
河北省邢台市临城县郝庄镇（临城薄皮核桃）
河北省邢台市内丘县侯家庄乡岗底村（富岗苹果）
河北省邢台市隆尧县牛家桥乡梅庄村（“隆红蜜”牌苹果）
河北省邢台市宁晋县河渠镇褚家庄村（工笔画）
河北省邢台市巨鹿县观寨乡南哈口村（哈口瓜菜）
河北省邢台市威县洺州镇邱霍寨村（威华葡萄）
河北省保定市满城区方顺桥镇（绿赛草莓）
河北省保定市清苑区北店乡牛庄村（绿龙蔬菜）
河北省保定市清苑区东闾乡南王庄村（清蜜西瓜）
河北省保定市定州市大辛庄镇（苗木花卉）
河北省保定市唐县南店头乡葛堡村（肉羊）
河北省保定市蠡县大曲堤镇大曲堤村（蠡县麻山药）
河北省保定市莲池区南大园乡窑上村（花卉）
河北省张家口市宣化区春光乡观后村（宣化牛奶葡萄）
河北省张家口市万全区郭磊庄镇何家屯村（禾久鲜食玉米）
河北省张家口市崇礼区西湾子镇上三道河村（彩椒）
河北省张家口市尚义县七甲乡（七甲山时令鲜蔬）
河北省张家口市涿鹿县五堡镇杨窑村（香花墚葡萄）
河北省承德市承德县新杖子乡（国光苹果、大樱桃）
河北省承德市平泉市卧龙镇 （平泉香菇）
河北省承德市滦平县付营子镇（滦绿黄瓜）
河北省承德市隆化县郭家屯镇小梁村（隆化肉牛）
河北省承德市宽城满族自治县化皮溜子镇西岔沟村（西富苹果）
河北省承德市围场满族蒙古族自治县新拨镇（二道河子胡萝卜）
河北省沧州市泊头市王武庄镇金马驹村（泊头鸭梨）
河北省沧州市崔尔庄镇（沧县金丝小枣）
河北省沧州市河间市龙华店镇兴隆店村（梨）
河北省沧州市青县曹寺乡（和顺鑫大棚蔬菜）
河北省沧州市肃宁县万里镇（蔬菜）
河北省沧州市献县高官乡（献王金丝小枣）
河北省廊坊市安次区落垡镇邢官营村（园农丰芹菜）
河北省廊坊市霸州市南孟镇西粉营村（绿玉田歌韭菜）
河北省廊坊市固安县牛驼镇前庞家务村（普春黄瓜）
河北省廊坊市固安县温泉园区南王起营村（花木）
河北省衡水市桃城区邓庄镇（樱桃西红柿）
河北省衡水市冀州区周村镇（冀周辣椒）
河北省衡水市武邑县龙店乡龙店村（集民黄瓜）
河北省衡水市饶阳县大尹村镇（蔬菜）
河北省衡水市安平县马店镇（圆隆白山药）
河北省衡水市故城县建国镇（兴月韭菜）
河北省衡水市阜城县漫河乡（漫河西瓜）
山西省太原市杏花岭区长沟村（休闲观光农业）
山西省太原市小店区小店街办孙家寨村（并州绿蔬菜）
山西省太原市晋源区北河下村（玉山时令鲜蔬）
山西省太原市古交市邢家社乡龙子村（净苑蔬菜）
山西省太原市清徐县柳杜乡成子村（蔬菜）
山西省太原市清徐县清源镇平泉村（清徐葡萄）
山西省太原市清徐县集义乡（蔬菜）
山西省太原市阳曲县高村乡北社村（阳曲小米）
山西省太原市娄烦县马家庄乡大圣堂村（绿海蔬菜）
山西省大同市阳高县东小村镇大嘴窑村（大嘴夭杏）
山西省大同市浑源县千佛岭乡泽清岭村（恒山黄芪）
山西省大同市左云县店湾镇范家寺村（西红柿、黄瓜）
山西省阳泉市郊区平坦镇桃林沟村（桃林沟生态旅游）
山西省阳泉市郊区西南舁乡北大西庄村（三舁苹果）
山西省阳泉市平定县柏井镇里牌岭村（牌岭蛋鸡）
山西省长治市长治县八义镇南窑沟村（酿酒葡萄）
山西省长治市长治县苏店镇东贾村（红运豪蔬菜）
山西省长治市长治县荫城镇荆圪道村（洁思蔬菜）
山西省长治市长治县振兴新区振兴村（休闲农业）
山西省长治市壶关县店上镇长林村（旱地西红柿）
山西省长治市武乡县故城镇权店村（权店梅）
山西省长治市沁县定昌镇下曲峪村（沁州黄小米）
山西省长治市沁源县韩洪乡旭河村（旭河粉条、粉皮）
山西省长治市沁源县沁河镇南石村（沁盛香花槐）
山西省晋城市阳城县次营镇赛村（阳城蚕桑）
山西省晋城市高平市河西镇仙井村（凯永生猪）
山西省晋城市陵川县夺火乡凤凰村（乡村休闲）
山西省晋城市泽州县周村镇下町村（钰山蛋鸡）
山西省朔州市应县金城镇龙泉村（龙泉胡萝卜）
山西省朔州市怀仁县亲和乡南小寨村（怀仁羔羊）
山西省晋中市榆次区东阳镇（晋一串蔬菜）
山西省晋中市左权县拐儿镇寺坪村（左权绵核桃）
山西省晋中市太谷县小白乡东崖六村（兴谷红枣）
山西省晋中市祁县城赵镇里村（里村肉牛）
山西省晋中市祁县古县镇（祁县酥梨）
山西省晋中市灵石县梁家焉乡泉则坪村（平泉核桃）
山西省运城市盐湖区泓芝驿镇王过村（王过酥梨）
山西省运城市盐湖区三路里镇杨家门村（冠之茹食用菌）
山西省运城市永济市张营乡常里村（常里红苹果）
山西省运城市临猗县临晋镇代村（临晋石榴）
山西省运城市临猗县庙上乡张庄村（冬枣）
山西省运城市万荣县汉薛镇南景村（景鸿万红宝桃）
山西省运城市万荣县贾村乡贾村（晋魁苹果）
山西省运城市稷山县稷峰镇加庄村（稷山板枣）
山西省运城市平陆县圣人涧镇槐下村（优质苹果）
山西省忻州市忻府区高城乡高城村（高城红辣椒）
山西省忻州市忻府区兰村乡河习头村（河习头酥梨）
山西省忻州市原平市东社镇（同川酥梨）
山西省忻州市繁峙县繁城镇赵家庄村（繁城大杏）
山西省临汾市尧都区贺家庄乡李家庄村（卧源鲜桃）
山西省临汾市曲沃县史村镇西海村（磨盘岭蔬菜）
山西省临汾市翼城县隆化镇北捍村（舜都苹果）
山西省临汾市翼城县唐兴镇南官庄村（古房陵苹果）
山西省临汾市安泽县马壁乡刘村（中药材）
山西省临汾市吉县东城乡柏东村（吉县苹果）
山西省临汾市吉县中垛乡南坪村（壶口苹果）
山西省临汾市隰县城南乡留城村（酥梨）
山西省吕梁市离石区信义镇严村（严村蔬菜）
山西省吕梁市孝义市大孝堡乡胜溪新村（绿盈蔬菜）
山西省吕梁市汾阳市杨家庄镇南偏城村（汾州核桃）
山西省吕梁市汾阳市峪道河镇下张家庄村（银丰核桃）
山西省吕梁市汾阳市栗家庄乡协和堡村（金薄丰核桃）
山西省吕梁市汾阳市杨家庄镇（汾州裕源核桃）
山西省吕梁市文水县孝义镇北武度村（裕丰蔬菜）
山西省吕梁市中阳县暖泉乡暖泉村（暖泉核桃）
山西省吕梁市中阳县暖泉镇王家庄村（核桃）
内蒙古自治区呼和浩特市赛罕区金河镇根堡村（绿联油葫芦）
内蒙古自治区包头市固阳县下湿壕镇新尧坡村（马铃薯）
内蒙古自治区包头市土默特右旗沟门镇西湾村（沟门苗木）
内蒙古自治区包头市土默特右旗美岱召镇沙图沟村（沙图沟杏王）
内蒙古自治区包头市达尔罕茂明安联合旗石宝镇腮吾素村（栗天喜石磨面粉）
内蒙古自治区乌海市海勃湾区千里山镇团结新村（蔬菜瓜果）
内蒙古自治区赤峰市元宝山区五家镇北台子村（二尾羊）
内蒙古自治区赤峰市松山区上官地镇（生猪）
内蒙古自治区赤峰市林西县新城子镇七合堂村（九佛山内蒙野果）
内蒙古自治区赤峰市巴林左旗十三敖包镇房身村（东傲笤帚）
内蒙古自治区赤峰市克什克腾旗浩来呼热苏木（昭乌达肉羊）
内蒙古自治区赤峰市喀喇沁旗牛家营子镇牛家营子村（中药材）
内蒙古自治区通辽市科尔沁区丰田镇万家屯村（科耳黑木耳）
内蒙古自治区通辽市科尔沁区育新镇小三合兴村（溪水圆葱）
内蒙古自治区通辽市开鲁县东风镇道德村（三鲁辣椒）
内蒙古自治区通辽市开鲁县东风镇（红干椒）
内蒙古自治区鄂尔多斯市达拉特旗树林召镇林原村（保善堂蔬菜）
内蒙古自治区鄂尔多斯市鄂托克前旗城川镇黄海子村（宥州辣椒）
内蒙古自治区鄂尔多斯市乌审旗嘎鲁图镇布寨嘎查（鄂尔多斯细毛羊）
内蒙古自治区呼伦贝尔市阿荣旗查巴奇乡猎民村（奶牛）
内蒙古自治区呼伦贝尔市阿荣旗向阳峪镇松塔沟村（松雪柞蚕养殖）
内蒙古自治区呼伦贝尔市莫力达瓦达斡尔族自治旗尼尔基镇兴隆泉村（菇娘）
内蒙古自治区呼伦贝尔市鄂温克族自治旗巴彦塔拉达斡尔民族乡伊兰嘎查（达瓦苏荣牛肉干）
内蒙古自治区巴彦淖尔市临河区八一乡联丰村（优质甜瓜）
内蒙古自治区巴彦淖尔市临河区新华镇新丰村（九叶青韭菜）
内蒙古自治区巴彦淖尔市五原县胜丰镇新红村（灯笼红香瓜）
内蒙古自治区巴彦淖尔市磴口县隆盛合镇新地村（甜瓜）
内蒙古自治区巴彦淖尔市乌拉特前旗先锋镇（富煌枸杞）
内蒙古自治区巴彦淖尔市杭锦后旗陕坝镇中南渠村（瓜菜）
内蒙古自治区乌兰察布市丰镇市巨宝庄镇巨宝庄村（丰露樱桃）
内蒙古自治区乌兰察布市商都县小海子镇向阳村（水漩绿韵芹菜）
内蒙古自治区乌兰察布市兴和县大库联乡边家村（马铃薯）
内蒙古自治区乌兰察布市察哈尔右翼前旗巴音塔拉镇水泉村（黄瓜）
内蒙古自治区乌兰察布市察哈尔右翼中旗乌素图镇（红萝卜）
内蒙古自治区乌兰察布市察哈尔右翼后旗乌兰哈达苏木七倾地村（后旗红马铃薯）
内蒙古自治区乌兰察布市四子王旗大黑河乡土格木村（太平庄马铃薯）
内蒙古自治区兴安盟乌兰浩特市乌兰哈达镇三合村（草原三河有机水稻）
内蒙古自治区兴安盟乌兰浩特市义勒力特镇黄家店嘎查（义勒力特大米）
内蒙古自治区兴安盟乌兰浩特市义勒力特镇义勒力特嘎查（义镇水果）
内蒙古自治区兴安盟突泉县突泉镇大营子村（溪柳紫皮蒜）
内蒙古自治区兴安盟科尔沁右翼前旗巴拉格歹乡哈拉黑村（哈拉黑大米）
内蒙古自治区兴安盟扎赉特旗好力保镇水田村（绰尔蒙珠大米）
内蒙古自治区锡林郭勒盟东乌珠穆沁旗满都宝力格镇巴彦布日德嘎查村（乌珠穆沁羊）
内蒙古自治区锡林郭勒盟太仆寺旗骆驼山镇榆树洼村（马铃薯）
内蒙古自治区锡林郭勒盟太仆寺旗千斤沟镇西山坡村（黑土洼大白菜）
内蒙古自治区阿拉善盟阿拉善左旗巴彦浩特镇巴彦霍德嘎查（温棚蔬菜）
内蒙古自治区阿拉善盟阿拉善右旗阿拉腾敖包镇查干努如嘎查（塔木素骆驼）
内蒙古自治区阿拉善盟额济纳旗巴彦陶来苏木镇推日木音陶来嘎查村（居延蜜瓜）
内蒙古自治区阿拉善盟额济纳旗东风镇额很查干嘎查（漠洲棉花）
辽宁省沈阳市辽中区养士堡镇养前村（棚菜）
辽宁省沈阳市法库县登仕堡子镇（树莓）
辽宁省沈阳市新民市大民屯镇方巾牛村（辽绿蔬菜）
辽宁省鞍山市海城市接文镇三家堡村（亿康良菌）
辽宁省鞍山市岫岩满族自治县牧牛镇益临村（香菇）
辽宁省本溪市桓仁满族自治县五里甸子镇老黑山村（平欧大榛子）
辽宁省本溪市桓仁满族自治县五里甸子镇桦树甸子村（五味子）
辽宁省本溪市桓仁满族自治县桓仁镇四河村（桓仁稻米）
辽宁省本溪市桓仁满族自治县北甸子乡（冰葡萄）
辽宁省丹东市振安区太平湾街道望江村（太平湾燕红桃）
辽宁省丹东市东港市椅圈镇夏家村（草莓）
辽宁省丹东市宽甸满族自治县振江镇（石柱参）
辽宁省锦州市北镇市中安镇（蔬菜）
辽宁省营口市盖州市二台乡石棚山村（红富士苹果）
辽宁省营口市盖州市九寨镇（油桃）
辽宁省营口市鲅鱼圈区红旗镇胜台村（葡萄）
辽宁省阜新蒙古族自治县伊吗图镇（设施农业、柿子、茄子）
辽宁省辽阳市文圣区东京陵街道高营墙村（草莓）
辽宁省辽阳市灯塔市柳条寨镇大新庄（辽峰葡萄）
辽宁省辽阳市灯塔市西马峰镇（青椒、西红柿）
辽宁省辽阳市辽阳县黄泥洼镇西岔子村（大白菜）
辽宁省辽阳市辽阳县黄泥洼镇（茄子）
辽宁省辽阳市辽阳县刘二堡镇前杜村（草莓）
辽宁省盘锦市大洼区清水镇（大清肉鸭）
辽宁省盘锦市盘山县胡家镇（胡家河蟹）
辽宁省铁岭市铁岭县李千户镇马侍郎桥村（马侍郎贡榛）
辽宁省铁岭市铁岭县李千户镇（铁岭榛子）
辽宁省铁岭市开原市靠山镇（苗木花卉）
辽宁省昌图县平安堡镇十里村（胡萝卜）
辽宁省朝阳市凌源市宋杖子镇范杖子村（凌馨甜椒）
辽宁省朝阳市凌源市刘杖子镇（溜圆葡萄）
辽宁省朝阳市建平县朱碌科镇（朝阳小米）
辽宁省葫芦岛市连山区塔山乡西堡村（国光苹果）
辽宁省葫芦岛市绥中县大王庙镇水泉沟村（绥中白梨）
辽宁省葫芦岛市绥中县高岭镇老爷庙村（大根萝卜）
辽宁省葫芦岛市绥中县西甸子镇杨家村（瑞州苹果）
大连市旅顺口区双岛湾街道胡家村（大樱桃）
大连市旅顺口区双岛湾街道曲家村（双岛湾洋梨）
大连市旅顺口区双岛湾街道张家村（美鹳苹果）
大连市旅顺口区铁山街道对庄沟村（仙缘甜樱桃）
大连市金普新区大魏家街道荞麦山村（大樱桃）
大连市普兰店区安波街道米屯村（安波米屯番茄）
大连市普兰店区墨盘街道中山村（墨盘花生）
大连市金普新区炮台街道大冯村（红彤大樱桃）
大连市普兰店区四平街道费屯村（草莓）
大连市普兰店区铁西街道玉皇庙社区（玉皇庙黄瓜）
大连市普兰店区同益街道张家村（高诚山苹果）
大连市瓦房店市复州城镇八里村（绿福油桃）
大连市瓦房店市驼山乡大魏村（驼山苹果）
大连市瓦房店市许屯镇东马屯村（苹果）
大连市瓦房店市赵屯乡高速村（锦宝苹果）
大连市瓦房店市赵屯乡前进村（九道河苹果）
大连市庄河市城山镇吉庆村（庄禾城山草莓）
大连市庄河市大营镇四家村（蓝仙子蓝莓）
大连市庄河市大郑镇葛炉村（田祖有机蔬菜）
大连市庄河市光明山镇小营村（小营村草莓）
大连市庄河市光明山镇（光明山草莓）
大连市庄河市太平岭乡歇马村（歇马杏）
吉林省长春市双阳区齐家镇曙光村（卧龙泉大米）
吉林省长春市双阳区鹿乡镇（梅花鹿）
吉林省长春市九台区东湖镇黑林村（棚室蔬菜）
吉林省长春市九台区纪家镇腰房村（玖玖华彩马铃薯）
吉林省长春市九台区波泥河镇（波泥河苗木花卉）
吉林省长春市榆树市八号镇北沟村（棚膜蔬菜）
吉林省长春市榆树市于家镇三道村（蓝河坝稻米）
吉林省长春市农安县靠山镇卧牛石村（红石砬小米）
吉林省吉林市蛟河市黄松甸镇（黄松甸黑木耳）
吉林省吉林市桦甸市二道甸子镇新风村（桦牛黄牛）
吉林省吉林市磐石市取柴河镇王家村（山姑娘滑子蘑）
吉林省吉林市永吉县西阳镇马鞍山村（罗圈沟葡萄）
吉林省四平市公主岭市怀德镇范家窑村（豆角）
吉林省四平市公主岭市响水镇湾龙村（响水湾龙蔬菜）
吉林省四平市双辽市红旗街道办事处（花生）
吉林省四平市梨树县喇嘛甸镇王家园子村（王家园子棚膜蔬菜）
吉林省四平市梨树县梨树镇高家村（棚膜蔬菜）
吉林省四平市梨树县小城子镇爱德村（晧月肉牛）
吉林省辽源市东丰县东丰镇太和村（鹿乡太和甜瓜）
吉林省辽源市东丰县小四平镇古年村（鹿乡金红苹果）
吉林省辽源市东辽县安石镇朝阳村（鴜鹭蟹稻米）
吉林省辽源市东辽县白泉镇永清村（花市酱腌菜）
吉林省辽源市东辽县辽河源镇公平朝鲜族村（源头御大米）
吉林省辽源市东辽县凌云乡凌镇村（有机大米）
吉林省通化市梅河口市双兴镇德庆村（原森黑木耳）
吉林省通化市通化县大泉源乡新设村（棚膜食用菌、香菇）
吉林省通化市通化县光华镇光华村（禾韵蓝莓）
吉林省通化市通化县三棵榆树镇沿江村（沈兆仁甜香瓜）
吉林省通化市辉南县庆阳镇西顺堡村（西顺晒黄烟）
吉林省通化市柳河县姜家店乡五星村（姜家店大米）
吉林省通化市柳河县姜家店乡三合村（有机稻米）
吉林省白山市临江市大栗子街道望江村（望江无核蜜汁葡萄）
吉林省白山市抚松县仙人桥镇黄家崴子村（黄家崴子蔬菜）
吉林省白山市抚松县北岗镇（淑正人参）
吉林省白山市抚松县万良镇（人参）
吉林省白山市抚松县新屯子镇（广茂源人参）
吉林省白山市抚松县兴参镇（辰讴人参）
吉林省白城市洮北区平台镇红塔村（雪寒韭菜）
吉林省白城市洮南县万宝镇西太平村（敖牛山有机小米）
吉林省白城市洮南市福顺镇（福茂红干椒）
吉林省白城市大安市安广镇永庆村（东北沙包地西甜瓜）
吉林省白城市大安市两家子镇同权村（笤帚）
吉林省延边朝鲜族自治州敦化市江源镇马五店村（贝母）
吉林省延边朝鲜族自治州珲春市马川子乡河南村（川香乐有机水稻）
吉林省延边朝鲜族自治州龙井市老头沟镇宝兴村（龙兴宝苹果梨）
吉林省延边朝鲜族自治州和龙市八家子镇河南村（八家子蔬菜）
吉林省延边朝鲜族自治州汪清县天桥岭青钩子村（山里友黑木耳）
吉林省延边朝鲜族自治州汪清县天桥岭镇（黑木耳）
吉林省延边朝鲜族自治州安图县明月镇福林村（山野菜）
黑龙江省哈尔滨市道外区民主镇胜利村（湿地旅游）
黑龙江省哈尔滨市呼兰区大用镇沈八村（禾下土杂粮）
黑龙江省哈尔滨市呼兰区双井街道新兴村（呼兰韭菜）
黑龙江省哈尔滨市双城区永治街道办事处（设施蔬菜）
黑龙江省哈尔滨市五常市拉林满族镇太平村（白菜）
黑龙江省哈尔滨市巴彦县丰乐乡春生村（狐貉獭兔）
黑龙江省齐齐哈尔市建华区高峰村（大葱）
黑龙江省齐齐哈尔市建华区曙光村（曙光红丁蔬菜）
黑龙江省齐齐哈尔市昂昂溪区榆树屯镇大五福玛村（大五福玛韭菜）
黑龙江省齐齐哈尔市富拉尔基区长青乡永前村（棚室蔬菜）
黑龙江省齐齐哈尔市梅里斯达斡尔族区梅里斯镇大八旗村（洋葱）
黑龙江省齐齐哈尔市梅里斯达斡尔族区梅里斯镇荣胜村（杜家窑甜瓜）
黑龙江省齐齐哈尔市甘南县兴十四镇兴十四村（兴十四村西瓜）
黑龙江省齐齐哈尔市克山县双河镇中心村（克山马铃薯）
黑龙江省齐齐哈尔市拜泉县大众乡长征村（香瓜）
黑龙江省鸡西市滴道区滴道河乡王家村（宏滴番茄）
黑龙江省鸡西市滴道区兰岭乡新立村（新立韭菜）
黑龙江省双鸭山市宝清县夹信子镇夹信子村（饶力河毛葱）
黑龙江省双鸭山市饶河县饶河镇饶河村（团山子甘蓝）
黑龙江省大庆市大同区大同镇一村（大棚果蔬）
黑龙江省伊春市五营区（蓝莓）
黑龙江省伊春市铁力市双丰镇朝阳村（九河泉绿色水稻）
黑龙江省伊春市嘉荫县青山乡（青河山黑木耳）
黑龙江省佳木斯市郊区长青乡万兴村（番茄）
黑龙江省佳木斯市桦南县大八浪乡新村（新村山葡萄）
黑龙江省佳木斯市桦南县驼腰子镇新合村（桦南仙紫紫苏）
黑龙江省七台河市勃利县勃利镇蔬菜村（勃利葡萄）
黑龙江省七台河市勃利县抢垦乡吉祥村（小毛葱）
黑龙江省牡丹江市阳明区庆丰村（杂粮）
黑龙江省牡丹江市阳明区铁岭镇四道村（四道村大米）
黑龙江省牡丹江市海林市海林镇模范村（威虎山猴头菇）
黑龙江省牡丹江市宁安市兰岗镇永政村（兰岗西瓜）
黑龙江省牡丹江市穆棱市兴源镇红盛村（红盛白瓜）
黑龙江省牡丹江市东宁市大肚川镇北河沿村（黑木耳）
黑龙江省牡丹江市东宁市道河镇土城子村（东宁黑木耳）
黑龙江省牡丹江市东宁市绥阳镇（绥阳耳黑木耳）
黑龙江省牡丹江市林口县龙爪镇红林村（红林之莓）
黑龙江省黑河市北安市通北镇通北村（通肯河黄瓜）
黑龙江省绥化市海伦市前进乡胜利村（兔耳红毛葱）
黑龙江省大兴安岭地区加格达奇白桦乡白华村（白桦吊瓜）
上海市嘉定区工业区灯塔村（农灯草莓）
上海市嘉定区马陆镇（葡萄）
上海市浦东新区大团镇多利农庄（多利农庄有机绿叶菜）
上海市浦东新区大团镇赵桥村（水蜜桃）
上海市浦东新区泥城镇马厂村（红刚青扁豆）
上海市浦东新区宣桥镇新安村（香嘭嘭鲜食玉米）
上海市浦东新区周浦镇棋杆村（平棋葡萄）
上海市金山区枫泾镇新义村（锦绣黄桃）
上海市金山区吕巷镇和平村（皇母蟠桃）
上海市金山区亭林镇后岗村（亭林雪瓜）
上海市金山区朱泾镇大茫村（珠丰甜瓜）
上海市松江区永丰街道镇盐仓村（仓桥水晶梨）
上海市青浦区夏阳街道塘郁村（沪香枇杷）
上海市青浦区白鹤镇（赵屯桥草莓）
上海市青浦区练塘镇（茭白）
上海市奉贤区青村镇解放村（黄桃）
上海市奉贤区庄行镇存古村（奉叶蜜梨）
上海市奉贤区庄行镇潘垫村（奉叶蜜梨）
上海市崇明区新河镇新建村（中华绒螯蟹）
上海市崇明区中兴镇（花菜）
上海市崇明区绿华镇（飞岛柑橘）
江苏省南京市浦口区盘城街道落桥社区（滁河湾葡萄）
江苏省南京市浦口区汤泉街道（“汤泉”牌苗木）
江苏省南京市栖霞区八卦洲街道（八卦洲芦蒿）
江苏省南京市江宁区横溪街道新杨社区居民委员会（绿王大自然西瓜）
江苏省南京市六合区马集镇大圣村（大圣水芹）
江苏省南京市溧水区白马镇石头寨村（金瑞蓝莓）
江苏省南京市高淳县东坝镇红松村（葡萄）
江苏省无锡市惠山区阳山镇（水蜜桃）
江苏省无锡市滨湖区马山街道（马山杨梅）
江苏省无锡市宜兴市湖㳇镇张阳村（张阳花卉）
江苏省无锡市宜兴市张渚镇省庄村（红岭茶叶）
江苏省无锡市宜兴市周铁镇洋溪村（洋溪萝卜）
江苏省无锡市江阴市顾山镇红豆村（金顾山水蜜桃）
江苏省无锡市江阴市月城镇双泾村（双泾葡萄）
江苏省无锡市江阴市璜土镇（璜土葡萄）
江苏省徐州市云龙区大龙湖办事处段山村（断山观赏鱼）
江苏省徐州市贾汪区茱萸山街道（休闲农业）
江苏省徐州市贾汪区紫庄镇（紫庄蔬菜）
江苏省徐州市铜山区三堡镇徐村（康华食用菌）
江苏省徐州市新沂市瓦窑镇街集村（新元有机芹菜）
江苏省徐州市邳州市港上镇前湖村（草莓）
江苏省徐州市邳州市铁富镇（邳州银杏）
江苏省徐州市沛县朱寨镇（生态肉鸭）
江苏省徐州市丰县大沙河镇（大沙河白酥梨）
江苏省常州市武进区礼嘉镇秦巷村（科丰葡萄）
江苏省常州市武进区洛阳镇阳湖村（苏常鲜葡萄）
江苏省常州市天宁区郑陆镇黄天荡村（黄天荡河蟹）
江苏省常州市金坛区金城镇白塔村（塔湖香葱）
江苏省常州市金坛区指前镇清水渎村（苏标河蟹）
江苏省常州市金坛区尧塘街道（花卉苗木）
江苏省常州市溧阳市社渚镇东升村（胥河青虾）
江苏省常州市溧阳市天目湖镇（休闲农业）
江苏省苏州市吴中区东山镇碧螺村（吴侬碧螺春茶）
江苏省苏州市吴中区金庭镇秉常村（青种枇杷）
江苏省苏州市相城区阳澄湖生态休闲旅游度假区莲花村（阳澄湖大闸蟹）
江苏省苏州市相城区阳澄湖镇北前村（阳澄湖大闸蟹）
江苏省苏州市常熟市董浜镇东盾村（曹家桥蔬菜）
江苏省苏州市常熟市沙家浜镇（阳澄湖大闸蟹）
江苏省南通市通州区二甲镇路中村（威奇太保蔬菜）
江苏省南通市通州区刘桥镇长岸村（嘉安荷仁豆）
江苏省南通市海安县大公镇群益村（鑫缘蚕茧）
江苏省南通市海安县老坝港滨海新区（角斜镇）（紫菜）
江苏省南通市海安县李堡镇光明村（绿浪蔬菜）
江苏省南通市启东市东海镇兴垦村（脊尾白虾）
江苏省南通市启东市惠萍镇果园村（“三水一高”梨）
江苏省南通市如皋市江安镇联络新社区（肉制品）
江苏省南通市如皋市如城街道（花木盆景）
江苏省南通市海门市常乐镇（常乐草莓、西甜瓜）
江苏省南通市海门市海永镇（乡村休闲）
江苏省南通市海门市四甲镇合兴村（海玉山药）
江苏省南通市如东县南通外向型农业综合开发区何丫村（南美白对虾）
江苏省南通市如东县马塘镇（精丰生猪）
江苏省连云港市云台街道后关村（野仙云雾）
江苏省连云港市赣榆区厉庄镇谢湖村（谢湖大樱桃）
江苏省连云港市东海县桃林镇北芹村（北芹口西葫芦）
江苏省连云港市东海县黄川镇（草莓）
江苏省连云港市灌云县南岗乡许相村（万惠芦蒿）
江苏省连云港市灌南县新安镇（灌南金针菇）
江苏省淮安市淮安区苏嘴镇（苏嘴西瓜）
江苏省淮安市淮阴区丁集镇娘庄村（丁集黄瓜）
江苏省淮安市洪泽区西顺河镇（洪泽湖大闸蟹）
江苏省淮安市清浦区黄码乡（淮安红椒）
江苏省淮安市金湖县前锋镇白马湖村（白马湖大闸蟹）
江苏省盐城市盐都区楼王镇（楼王异育银鲫）
江苏省盐城市响水县张集社区韩荡村（天荷源莲藕汁）
江苏省盐城市射阳县洋马镇药材村（菊花）
江苏省盐城市东台市富安镇（干桑蚕茧）
江苏省盐城市大丰市大中镇恒北村（麋鹿早酥梨）
江苏省扬州市江都区小纪镇吉东村（罗氏沼虾）
江苏省扬州市江都区丁伙镇（丁伙花木）
江苏省扬州市宝应区泾河镇松竹村（果蔬）
江苏省扬州市宝应区忘直港镇北河村（宝应核桃乌）
江苏省扬州市仪征市真州镇三八村（绿篱蔬菜）
江苏省扬州市仪征市真州镇佐安村（康大葡萄）
江苏省扬州市高邮市送桥镇邵庄村（润湖高邮鸭）
江苏省镇江市丹徒区上党镇敖毅村（尚香黄桃）
江苏省镇江市丹阳市司徒镇屯甸村（金山翠芽）
江苏省镇江市句容市天王镇戴庄村（野山小村大米）
江苏省镇江市句容市天王镇唐陵村（华安彩叶花卉苗木）
江苏省镇江市句容市后白镇西冯村（西冯草坪）
江苏省镇江市句容市茅山镇丁庄村（老方葡萄）
江苏省泰州市高港区白马镇岱白村（绿姿苗木）
江苏省泰州市姜堰区桥头镇桥头村（香菇）
江苏省泰州市姜堰区溱潼镇（溱湖河蟹）
江苏省泰州市姜堰区沈高镇（河横西瓜、葡萄）
江苏省泰州市兴化市陈堡镇蒋庄村（红富堡番茄）
江苏省泰州市兴化市垛田镇（香葱）
江苏省泰州市兴化市缸顾乡东旺村（千垛菜花）
江苏省泰州市泰兴市黄桥镇祁巷村（祁巷蔬菜）
江苏省泰州市泰兴市宣堡镇郭寨村（苗木）
江苏省宿迁市沭阳县庙头镇聚贤村（花卉）
江苏省宿迁市沭阳县新河镇（沭阳新河花木）
江苏省宿迁市沭阳县颜集镇（虞姬花卉苗木）
江苏省宿迁市泗阳县八集乡（八集小花生）
江苏省宿迁市泗洪县临淮镇（佳健河蟹）
浙江省杭州市萧山区益农镇三围村（蔬菜）
浙江省杭州市余杭区仁和街道花园村（伍莲红花卉苗木）
浙江省杭州市余杭区运河镇双桥村（生态鳖）
浙江省杭州市余杭区中泰街道紫荆村（中泰竹笛）
浙江省杭州市余杭区径山镇（古钟径山茶）
浙江省杭州市富阳区新登镇半山村（鲜桃）
浙江省杭州市桐庐县横村镇阳山畈村（阳山畈水蜜桃）
浙江省杭州市桐庐县钟山乡大市村（桐江钟山蜜梨）
浙江省杭州市淳安县千岛湖镇青溪村（景山水蜜桃）
浙江省温州市乐清市大荆镇平园村（铁皮石斛枫斗）
浙江省温州市乐清市仙溪镇北垟村（铁皮石斛）
浙江省温州市平阳县水头镇新联村（平阳黄汤茶）
浙江省温州市泰顺县罗阳镇恩岱垟村（恩岱垟猕猴桃）
浙江省嘉兴市桐乡市乌镇镇董家村（董家茭白）
浙江省嘉兴市嘉善县罗星街道马家桥村（银嘉膳甜瓜）
浙江省嘉兴市嘉善县天凝镇光明村（杨庙雪菜）
浙江省湖州市南浔区菱湖镇陈邑村（加州鲈鱼）
浙江省湖州市德清县三合乡塘家琪村（水精灵青虾）
浙江省湖州市长兴县和平镇吴村村（霞幕山白茶）
浙江省湖州市安吉县灵峰镇剑山村（剑山砂梨）
浙江省湖州市安吉县天荒坪镇大溪村（农家乐）
浙江省湖州市安吉县溪龙乡（安吉白茶）
浙江省绍兴市上虞区盖北镇（葡萄）
浙江省绍兴市诸暨市同山镇绿剑村（茶叶）
浙江省绍兴市新昌县镜岭镇外婆坑村（外婆坑龙井）
浙江省金华市婺城区罗店镇后溪村（山茶花）
浙江省金华市婺城区竹马乡下张家村（竹马乡茶花）
浙江省衢州市柯城区七里乡（七里源茄子）
浙江省衢州市柯城区石梁镇（衢州椪柑）
浙江省衢州市江山市坛石镇（江山白银耳鸡）
浙江省衢州市开化县村头镇大黄山村（开化龙顶）
浙江省舟山市普陀区朱家尖镇莲花村（渔家乐）
浙江省舟山市嵊泗县枸杞镇（贻贝）
浙江省台州市温岭市滨海镇民益村（大棚葡萄）
浙江省台州市临海市白水洋镇上游村（上清杨梅）
浙江省台州市临海市上盘镇劳动村（碧畅西兰花）
浙江省台州市临海市涌泉镇梅岘村（梅尖山柑橘）
浙江省台州市玉环县干江镇甸山头村（甸山盘菜）
浙江省台州市玉环县清港镇樟岙村（文旦）
浙江省台州市天台县三州镇车门湾村（茶叶）
浙江省台州市天台县石梁镇（天台山云雾茶）
浙江省台州市仙居县步路乡（仙居杨梅）
浙江省台州市仙居县步路乡西炉村（杨梅）
浙江省丽水市缙云县前路镇南弄村（南隆水蜜桃）
浙江省丽水市松阳县新兴乡（越玉兰松阳茶）
浙江省丽水市庆元县黄田镇中济村（黄田灰树花）
浙江省宁波市海曙区龙观乡李岙村（辣椒）
宁波市鄞州区五乡镇钟家沙村（天明琳芝葡萄）
浙江省宁波市海曙区章水镇杖锡村（高湾枇杷）
浙江省宁波市奉化区尚田镇冷西村（溪口雷笋）
浙江省宁波市奉化区西坞街道金峨村（锦屏山奉化水蜜桃）
浙江省宁波市奉化区溪口镇新建村（第一泉茶叶）
浙江省宁波市奉化区溪口镇许江岸村（慈溪蜜梨）
浙江省宁波市奉化区萧王庙街道林家村（金峨花木）
宁波市奉化市溪口镇（双峰香榧）
宁波市余姚市临山镇兰海村（古址茭白）
宁波市余姚市陆埠镇裘岙村（味香园余姚葡萄）
宁波市余姚市三七市镇石步村（骆驼珠茶）
宁波市余姚市小曹娥镇人和村（余姚杨梅）
宁波市余姚市河姆渡镇（钟家沙茭白）
宁波市慈溪市周巷镇新缪路村（奉冠草莓）
宁波市象山县定塘镇沙地村（柑橘）
宁波市象山县晓塘乡西边塘村（李岙桂花）
宁波市象山县新桥镇高湾村（杖锡山樱花）
宁波市宁海县黄坛镇里天河村（锦屏山水蜜桃）
宁波市宁海县深甽镇望海岗村（水蜜桃）
宁波市宁海县长街镇成塘村（蔬菜）
安徽省芜湖县陶辛镇马桥村（青虾）
安徽省宁国市南极乡梅村村（山核桃）
安徽省铜陵县顺安镇凤凰山村（凤丹皮）
安徽省池州市贵池区梅村镇霄坑村（霄坑绿茶）
安徽省休宁县海阳镇盐铺村（菊花）
安徽省合肥市包河区大圩镇新民村（葡萄）
安徽省淮北市杜集区段园镇大庄村（葡萄）
安徽省宿州市埇桥区西寺坡镇谷家村（蔬菜）
安徽省蚌埠市淮上区梅桥乡苗台村（大青豆）
安徽省阜南县黄岗镇（柳编）
安徽省岳西县主簿镇（岳西茭白）
安徽省长丰县水湖镇（长丰草莓）
安徽省宿州市埇桥区西二铺乡沟西村（沟西村西瓜）
安徽省亳州市谯城区十九里镇（芍花中药材）
安徽省太和县李兴镇（鹏宇桔梗）
安徽省蚌埠市禹会区涂山风景区（怀远石榴）
安徽省滁州市南谯区施集镇杨饭店村（金玉滁菊）
安徽省无为县泉塘乡中垄村（濡泉螃蟹）
安徽省潜山县塔畈乡倪河村（天柱仙芽）
安徽省宣城市宣州区五星乡刘福村（福雪芹芽）
安徽省石台县横渡镇河西村（绿色石桥步经果）
安徽省黄山市黄山区新明乡猴坑村（太平猴魁）
安徽省当涂县乌溪镇七房村（七房蟹苗）
安徽省广德县东亭乡高峰村（圣卫工艺折扇）
安徽省霍山县漫水河镇南庄村（漫水河百合）
安徽省肥东县牌坊乡牌坊民族村（千柳杭椒）
安徽省砀山县官庄坝镇岳庄坝村（御乐园砀山梨）
安徽省涡阳县义门镇（义门涡阳苔干）
安徽省阜南县会龙镇（会龙辣椒）
安徽省天长市铜城镇龙岗社区（天长龙岗芡实）
安徽省裕安县顺河镇王滩村（华园顺河辣椒）
安徽省繁昌县荻港镇庆大村（繁园葡萄）
安徽省铜陵市老洲镇光辉村（老洲蔬菜）
安徽省和县历阳镇太平村（和县辣椒）
安徽省岳西县姚河乡梯岭村（岳西翠兰）
安徽省泾县汀溪乡（汀溪兰香茶）
安徽省歙县深渡镇（三潭枇杷）
安徽省广德县东亭乡沙坝村（正文红薯）
安徽省肥西县上派镇三岗村（三岗苗木花卉）
安徽省砀山县良梨镇杨集村（砀山酥梨）
安徽省亳州市谯城区十河镇大周村（天意蔬菜）
安徽省阜阳市颍州区颍西街道办事处（心芽大青茄）
安徽省全椒县二郎口镇曹埠村（赤镇龙虾）
安徽省南陵县何湾镇丫山村（丫山凤丹）
安徽省含山县环峰镇祁门村（皖中花芝麻油）
安徽省宣城市宣州区水阳镇吴村村（水阳江幼蟹）
安徽省青阳县新河镇十里岗村（皖南土鸡）
安徽省岳西县姚河乡（岳西翠兰）
安徽省黟县碧阳镇深冲村（黄山毛峰）
安徽省宿松县二郎镇界岭村（郎芽油茶）
安徽省广德县新杭镇阳湾村（广绿世界苗木）
安徽省庐江县白湖镇西城村（柳风荸荠）
安徽省宿州市埇桥区西二铺乡沈家村（汤家蔬菜）
安徽省怀远县白莲坡镇白莲坡村（茨淮黑鱼）
安徽省来安县舜山镇林桥村（林桥苗木）
安徽省金寨县麻埠镇桂花村（六安瓜片）
安徽省芜湖市镜湖区方村镇旗杆村（旗杆荸荠）
安徽省旌德县庙首镇祥云村（天山鹤茶叶）
安徽省铜陵市郊区灰河乡东风村（添秀葡萄）
安徽省岳西县来榜镇斑竹村（馨梦丝缘蚕茧）
安徽省广德县杨滩镇五合村（鹰台山绿茶）
安徽省宿松县洲头乡金坝村（金坝葡萄）
安徽省亳州市谯城区十八里镇（药信中药材）
安徽省徽州区富溪乡（黄山毛峰）
安徽省合肥市巢湖市中垾镇小联圩村（蔬菜）
安徽省安庆市桐城市龙眠街道凤形村（茶叶）
安徽省池州市贵池区棠溪镇西山村（西山焦枣）
安徽省宣城市绩溪县上庄镇余川村（茶叶）
安徽省黄山市祁门县平里镇贵溪村（祁门红茶）
安徽省阜阳市临泉县杨小街镇王新村（蔬菜）
安徽省宿州市萧县酒店镇西赵楼村（西瓜）
安徽省铜陵市枞阳县麒麟镇新安村（苗木）
安徽省滁州市凤阳县小溪河镇小岗村（休闲农业）
安徽省广德县四合乡太平村（茶叶）
安徽省宿松县柳坪乡邱山村（茶叶）
安徽省六安市霍山县太平畈乡（霍山石斛）
安徽省芜湖市无为县泉塘镇（螃蟹）
福建省福州市长乐市古槐镇青山村（青山龙眼）
福建省福州市罗源县起步镇上长治村（秀珍菇）
福建省莆田市城厢区常太镇（枇杷）
福建省莆田市涵江区荻芦镇（萩芦枇杷）
福建省莆田市仙游县度尾镇湘溪村（文旦柚）
福建省莆田市仙游县书峰乡书峰村（书峰枇杷）
福建省三明市三元区莘口镇西际村（南棱山柑桔）
福建省三明市永安市小陶镇新寨村（陶洋莴苣）
福建省三明市明溪县城关乡狮窠村（狮窠淮山）
福建省三明市清流县嵩溪镇青山村（春趣花卉）
福建省三明市大田县吴山乡（仙顶茶叶）
福建省三明市尤溪县洋中镇后楼村（天峰山食用菌）
福建省三明市沙县郑湖乡庆洋村（水柿）
福建省三明市建宁县溪口镇枧头村（建绿黄花梨）
福建省泉州市安溪县长坑镇山格村（山格淮山）
福建省泉州市德化县龙浔镇英山村（芹峰德化淮山）
福建省泉州市德化县三班镇龙阙村（黑鸡）
福建省漳州市云霄县马铺乡客寮村（马铺淮山）
福建省漳州市云霄县下河乡下河村（下河杨桃）
福建省漳州市长泰县马洋溪生态旅游区旺亭村（旺头香蕉）
福建省漳州市长泰县岩溪镇石铭村（石铭槟榔芋）
福建省漳州市平和县小溪镇（琯溪蜜柚）
福建省南平市邵武市桂林乡（邵武笋干）
福建省南平市邵武市和平镇坎头村（邵武碎铜茶）
福建省南平市顺昌县郑坊镇郑坊村（红地球葡萄）
福建省南平市顺昌县洋墩乡（顺昌芦柑）
福建省南平市政和县镇前镇半源村（翡翠灵芽）
福建省龙岩市永定区金砂乡上金村（美蕉）
福建省龙岩市永定区仙师镇务田村（永定六月红早熟芋）
福建省龙岩市漳平市吾祠镇厚德村（厚德萝卜）
福建省龙岩市漳平市南洋乡（漳平水仙茶）
福建省龙岩市漳平市永福镇（台品高山茶）
福建省龙岩市漳平市拱桥镇（福上界莲子）
福建省龙岩市上杭县稔田镇（蓉湖红肉蜜柚）
福建省龙岩市上杭县下都镇（下都沙田柚）
福建省龙岩市连城县北团镇石丰村（连城白鸭）
福建省宁德市福安市坂中乡坑下村（茄子）
福建省宁德市福安市溪柄镇溪柄村（福安巨峰葡萄）
福建省宁德市福鼎市店下镇店下村（鼎逗豆蚕豆）
福建省宁德市霞浦县崇儒乡崇儒村（崇儒畲山芙蓉李）
福建省宁德市古田县吉巷乡韦端村（古田水蜜桃）
福建省宁德市寿宁县武曲镇承天村（乌龙茶）
厦门市同安区洪塘镇郭山村（紫长茄）
厦门市同安区莲花镇军营村（茶叶）
厦门市同安区汀溪镇顶村村（绿茭林茭白）
厦门市翔安区新店镇大宅社区（大宅村火龙果）
厦门市翔安区新圩镇乌山村（青葱）
江西省南昌市新建区望城镇小桥村（小桥村苗木）
江西省南昌市南昌县三江镇（三江口萝卜）
江西省南昌市安义县长均乡（蔬菜）
江西省南昌市安义县黄洲镇（从玉蔬菜）
江西省南昌市进贤县文港镇（周虎臣毛笔）
江西省景德镇市乐平市乐港镇袁家村（绿乐莴笋）
江西省景德镇市乐平市镇桥镇百乐村（蔬菜）
江西省景德镇市浮梁县江村乡沽演村（浮梁茶）
江西省景德镇市浮梁县西湖乡（浮梁茶）
江西省萍乡市安源区五陂镇长潭村（蔬菜）
江西省萍乡市湘东区麻山镇麻山村（葡萄）
江西省萍乡市莲花县琴亭镇莲花村（莲花仙子莲子）
江西省萍乡市芦溪县银河镇（格林米特生猪）
江西省九江市瑞昌市高丰镇青丰村（瑞昌山药）
江西省九江市濂溪区赛阳镇金桥村（庐山苗木）
江西省九江市修水县马坳乡黄溪村（井岗红星蚕桑）
江西省九江市永修县柘林镇易家河村（柑桔）
江西省九江市都昌县周溪镇虬门村（鄱湖珍珠）
江西省新余市渝水区界水乡联盟村（界水联盟蔬菜）
江西省新余市渝水区罗坊镇湖头村（古月湖湖藕）
江西省新余市渝水区仙女湖风景区仰天岗办事处湖陂村（湖陂葡萄）
江西省新余市分宜县凤阳镇大路边村（麒麟西瓜）
江西省鹰潭市贵溪市白田乡北山村（油茶）
江西省鹰潭市贵溪市雷溪镇严桥村（洪剑丰蔬菜）
江西省鹰潭市贵溪市文坊镇吊桥村（香台山食用菌）
江西省赣州市南康区浮石乡江口村（南康甜柚）
江西省赣州市赣县区五云镇（五云桥蔬菜）
江西省赣州市信丰县大塘埠镇长岗村（脐橙）
江西省赣州市大余县黄龙镇旱田村（金边瑞香花卉）
江西省赣州市上犹县梅水乡园村村（犹江绿月茶）
江西省赣州市宁都县会同镇（惠大赣南脐橙）
江西省赣州市于都县古山镇长龙村（盘古龙珠绿茶）
江西省吉安市井冈山市黄坳乡光裕村（井冈红茶叶）
江西省吉安市吉安县横江镇濠云村（横江葡萄）
江西省吉安市吉水县醪桥镇黄家边村（井冈蜜柚）
江西省吉安市峡江县金江乡城上村（青池蒿菜）
江西省吉安市新干县三湖镇（三湖红桔）
江西省吉安市永丰县鹿冈乡（有机白茶）
江西省吉安市遂川县汤湖镇（狗牯脑茶）
江西省宜春市袁州区洪塘镇宝山村（芦塘寨有机山油茶）
江西省宜春市袁州区湖田镇王华村（苦瓜）
江西省宜春市袁州区寨下镇大宇村（宇贵蔬菜）
江西省宜春市丰城市袁渡镇青围村（袁渡豇豆）
江西省宜春市靖安县高湖镇古楠村（古楠村大米）
江西省抚州市临川区连城乡下庄村（抚州西瓜）
江西省抚州市南丰县桑田镇西源村（冠日裕丰甲鱼）
江西省抚州市崇仁县孙坊镇庙上村（崇仁麻鸡）
江西省抚州市资溪县嵩市镇高陂村（逸沁白茶）
江西省上饶市广丰区排山镇牌门村（广丰马家柚）
江西省上饶市玉山县临湖镇（临湖大蒜）
江西省上饶市铅山县紫溪乡紫溪村（红芽芋）
江西省上饶市余干县三塘乡明湖村（芡实）
江西省上饶市鄱阳县三庙前乡濠湖村（鄱鑫黄鳝）
江西省上饶市万年县陈营镇社里村（珍珠养殖与加工）
江西省上饶市婺源县大鄣山乡鄣山村（婺源绿茶）
山东省济南市长清区马山镇（马山栝楼）
山东省济南市长清区万德街道办事处（灵岩红茶叶）
山东省济南市章丘区高官寨街道办事处官庄村（官庄村甜瓜）
山东省济南市章丘区刁镇鲍家村（章丘鲍芹）
山东省济南市章丘区枣园街道万新村（章丘大葱）
山东省济南市济阳县曲堤镇（曲堤黄瓜）
山东省济南市商河县白桥镇（大蒜）
山东省济南市商河县玉皇庙镇瓦西村（瓦西冬瓜）
山东省淄博市淄川区昆仑镇马棚村（卧虎山椿芽）
山东省淄博市博山区源泉镇（珍珠泉猕猴桃）
山东省淄博市桓台县新城镇河南村（细毛山药）
山东省淄博市高青县黑里寨镇（昊琨西瓜）
山东省淄博市沂源县悦庄镇东悦庄村（悦庄韭菜）
山东省淄博市沂源县张家坡镇（沂源苹果）
山东省淄博市沂源县中庄镇（中庄苹果）
山东省枣庄市峄城区榴园镇（榴园石榴）
山东省枣庄市山亭区店子镇（店子长红枣）
山东省枣庄市山亭区冯卯镇（仙玉莲油桃）
山东省枣庄市山亭区水泉镇（火樱桃）
山东省枣庄市山亭区徐庄镇（徐庄板栗）
山东省枣庄市滕州市界河镇（滕州马铃薯）
山东省东营市河口区义和镇（金河口苹果）
山东省东营市垦利区永安镇（黄河口大闸蟹）
山东省东营市广饶县大码头镇（大码头食用菌）
山东省东营市广饶县大王镇（蔬菜）
山东省东营市广饶县稻庄镇（鲁野草莓）
山东省东营市广饶县花官镇（大蒜、肉鸡、食用菌）
山东省烟台市福山区回里镇善疃村（回里苹果）
山东省烟台市福山区门楼镇仉村周村（田然禾旱稻）
山东省烟台市福山区张格庄镇（张格庄大樱桃）
山东省烟台市牟平区观水镇（苹果）
山东省烟台市蓬莱市村里集镇（艾崮红苹果）
山东省烟台市蓬莱市大辛店镇（苹果）
山东省烟台市招远市毕郭镇官地洼村（官地洼西瓜）
山东省烟台市栖霞市桃村镇国路夼村（国路夼红大樱桃）
山东省烟台市栖霞市观里镇（栖霞苹果）
山东省潍坊市寒亭区朱里街道（潍县萝卜）
山东省潍坊市坊子区坊安街道洼里村（玉泉洼有机果蔬）
山东省潍坊市青州市王坟镇（青州山楂）
山东省潍坊市青州市谭坊镇（谭坊西瓜）
山东省潍坊市诸城市桃林镇山东头村（怡明绿茶）
山东省潍坊市安丘市柘山镇（柘山花生）
山东省潍坊市临朐县冶源镇杨善集村（西瓜）
山东省潍坊市昌乐县宝都街道办事处（宝城西瓜）
山东省济宁市兖州区颜店镇史家村（颜店肉鸭）
山东省济宁市曲阜市石门山镇（石门山草莓）
山东省济宁市邹城市看庄镇（七贤宝土豆）
山东省济宁市微山县高楼乡（微山湖河蟹）
山东省济宁市微山县两城镇（两城大蒜）
山东省济宁市鱼台县张黄镇于梅村（鱼台毛木耳）
山东省济宁市金乡县卜集乡杨庄村（大蒜）
山东省济宁市嘉祥县满硐镇（辣椒）
山东省济宁市汶上县白石镇（核桃）
山东省济宁市梁山县馆驿镇西张庄村（食用菌）
山东省泰安市岱岳区房村镇（泰山珍珠西红柿）
山东省泰安市新泰市龙廷镇掌平洼村（龙廷杏梅）
山东省泰安市肥城市边院镇济河堂村（济河堂有机蔬菜）
山东省泰安市肥城市桃园镇（金佛星马铃薯、桃乡宝大白菜）
山东省泰安市肥城市汶阳镇（瑞菏农庄绿菜花）
山东省泰安市宁阳县蒋集镇郑家龙泉村（有机蔬菜）
山东省泰安市东平县斑鸠店镇（斑鸠店大蒜）
山东省威海市文登区张家产镇（文登西洋参）
山东省威海市荣成市成山镇西霞口村（西霞口野生刺参）
山东省威海市荣成市城西河西村（荣成苹果）
山东省威海市荣成市俚岛镇（海带）
山东省威海市乳山市大孤山镇（御姜堂大姜）
山东省威海市乳山市崖子镇（苹果）
山东省日照市东港区陈疃镇（日照蓝莓）
山东省日照市东港区西湖镇（十八垛食用菌）
山东省日照市岚山区巨峰镇（茶叶）
山东省日照市五莲县许孟镇（绿发西葫芦）
山东省日照市莒县库山乡（莒县丹参、黄芩）
山东省日照市莒县夏庄镇（浮来青绿茶）
山东省日照市莒县小店镇（文心绿芦笋）
山东省莱芜市莱城区羊里镇西留村（生姜）
山东省莱芜市莱城区羊里镇（莱芜生姜）
山东省莱芜市钢城区艾山街道办事处庙子村（庙子粉皮）
山东省莱芜市钢城区黄庄镇霞峰村（黄金蜜桃）
山东省莱芜市钢城区汶源街道（汶源蟠桃）
山东省临沂市河东区汤河镇（沂州海棠）
山东省临沂市沂南县双堠镇埠口村（绿蒙山油桃）
山东省临沂市沂南县铜井镇（休闲农业）
山东省临沂市沂南县辛集镇（沂南黄瓜）
山东省临沂市沂水县许家湖镇（生姜）
山东省临沂市兰陵县庄坞镇（蒡之道牛蒡）
山东省临沂市费县胡阳镇（胡阳西红柿）
山东省临沂市平邑县郑城镇（金银花）
山东省临沂市莒南县洙边镇（金龙湖绿茶）
山东省临沂市蒙阴县旧寨乡（蒙荫蜜桃）
山东省临沂市蒙阴县岱崮镇（蒙阴蜜桃）
山东省德州市乐陵市杨安镇（“飘”牌调味品）
山东省德州市庆云县徐园子乡张培元村（祥园大葱）
山东省德州市齐河县宣章屯镇（晏婴蔬菜）
山东省德州市齐河县祝阿镇（祝阿西瓜）
山东省德州市平原县坊子乡（坊欣庄园西葫芦）
山东省德州市夏津县白马湖镇前梅村（前后梅大葱）
山东省德州市武城县老城镇后庄村（英潮武城辣椒）
山东省聊城市东昌府区堂邑镇路西村（堂邑工艺葫芦）
山东省聊城市阳谷县阿城镇（奥德源蔬菜）
山东省聊城市莘县河店镇（莘绿香瓜）
山东省聊城市莘县燕店镇（王公香瓜）
山东省聊城市冠县东古城镇田马元村（田马元甜樱桃、苹果）
山东省聊城市冠县兰沃乡韩路村（冠县鸭梨）
山东省滨州市滨城区三河湖镇王立平村（笠坪韭菜）
山东省滨州市沾化县下洼镇（冬枣）
山东省滨州市阳信县金阳街道办事处（阳信鸭梨）
山东省滨州市无棣县海丰街道办事处大齐村（大齐黄金杏）
山东省滨州市博兴县店子镇（博绿西红柿）
山东省滨州市博兴县乔庄镇（黄三角南美白对虾）
山东省菏泽市定陶区陈集镇七一村（天智绿业山药）
山东省菏泽市定陶区陈集镇（陈集山药）
山东省菏泽市曹县青堌集镇（芦笋）
山东省菏泽市成武县白浮图镇（翠博芸豆）
山东省菏泽市成武县大田集镇（田集大蒜）
山东省菏泽市巨野县大义镇吴集村（添口福大棚蔬菜）
山东省菏泽市巨野县陶庙镇（大蒜）
山东省菏泽市郓城县李集镇梁楼村（芦笋）
山东省菏泽市东明县陆圈镇马军营村（蔬菜）
青岛市西海岸新区灵珠山街道办事处（休闲农业）
青岛市西海岸新区王台镇东漕汶村（蔬菜）
青岛市西海岸新区张家楼镇丁家寨村（沃林蓝莓）
青岛市西海岸新区张家楼镇（黄岛蓝莓）
青岛市西海岸新区大村镇（大村食用菌）
青岛市西海岸新区海青镇（碧雪春茶叶）
青岛市城阳区夏庄街道山色峪社区（山色峪樱桃）
青岛市红岛经济区红岛街道办事处（红岛蛤蜊）
青岛市胶州市胶莱镇南王疃村（绿水蔬菜）
青岛市胶州市九龙镇人荣村（老少乐樱桃番茄）
青岛市胶州市里岔镇良乡一村（胶州大白菜）
青岛市胶州市胶莱镇（胶州大白菜）
青岛市胶州市胶西镇（公信马铃薯）
青岛市即墨市鳌山卫街道鳌角石村（鳌福茶叶）
青岛市即墨市鳌山卫镇孙家白庙村（白庙芋头）
青岛市即墨市段泊岚镇天宫院村（刘家庄园蔬菜）
青岛市即墨市金口镇海堤村（芹菜）
青岛市平度市城关街道北窝洛子村（窝洛子大姜）
青岛市平度市大泽山镇（葡萄）
青岛市平度市旧店镇（旧店苹果）
青岛市平度市明村镇（大黄埠西瓜）
青岛市平度市仁兆镇（沽河蔬菜）
青岛市平度市云山镇（云山大樱桃）
青岛市莱西市店埠镇后水口村（生姜）
青岛市莱西市河头店镇姜格庄村（东山泉草莓）
青岛市莱西市店埠镇（店埠胡萝卜）
河南省郑州市新郑市龙湖镇泰山村（休闲农业）
河南省开封市祥符区杜良乡（杜良大米）
河南省开封市杞县城郊乡平厂村（渊启大蒜）
河南省开封市杞县葛岗镇孟寨村（孟杞大蒜）
河南省开封市通许县长智镇岳寨村（早熟无公害苹果）
河南省开封市兰考县红庙镇夏武营村（夏武营蔬菜）
河南省洛阳市孟津县送庄镇梁凹村（慧林源蔬菜）
河南省平顶山市鲁山县辛集乡张庄村（华豫仙缘葡萄）
河南省平顶山市郏县长桥镇郑桥村（坡河萝卜）
河南省平顶山市郏县冢头镇前王庄村（大根萝卜）
河南省安阳市龙安区龙泉镇陈家坡村（四季春花卉苗木）
河南省安阳市林州市茶店镇（太行菊）
河南省安阳市内黄县后河镇（枣相情红枣）
河南省鹤壁市浚县伾山街道办事处角场营村（元宵）
河南省鹤壁市浚县伾山街道办事处西杨玘屯村（浚县泥咕咕）
河南省鹤壁市浚县屯子镇郑厂村（浚县石雕石刻）
河南省新乡市卫辉市安都乡庄和村（卫红花）
河南省新乡市卫辉市唐庄镇仁里屯村（仁礼信马铃薯）
河南省新乡市辉县市冀屯镇（鑫菌菇类）
河南省新乡市封丘县陈固镇东仲宫村（佐今明金银花）
河南省新乡市封丘县留光镇青堆村（树莓）
河南省焦作市孟州市河雍办事处东田丈村（孟香蜜桃）
河南省焦作市博爱县寨豁乡小底村（樱桃）
河南省焦作市博爱县孝敬镇（孝敬蔬菜）
河南省焦作市武陟县乔庙镇马宣寨村（菡香大米）
河南省濮阳市南乐县谷金楼镇东邵郭村（苹果）
河南省濮阳市南乐县西邵乡刘苑村（苑村莲藕）
河南省濮阳市范县陈庄镇前张枣坡村（黄河之莲莲藕）
河南省濮阳市范县陈庄乡（黄河之莲莲藕）
河南省许昌市建安区河街乡（质源腐竹）
河南省许昌市禹州市古城镇关岗村（红薯三粉）
河南省许昌市襄城县十里铺镇单庄村（单桥芦笋）
河南省许昌市襄城县王洛镇张庄村（张庄大菜园蔬果）
河南省许昌市襄城县湛北乡尚庄村（大棚瓜菜）
河南省漯河市舞阳县文峰乡李斌庄村（连华宝食用菌）
河南省漯河市临颍县杜曲镇龙堂村（龙云蔬菜）
河南省漯河市临颍县王岗镇（小辣椒）
河南省三门峡市灵宝市寺河乡（灵宝苹果）
河南省三门峡市灵宝市阳平镇（轩辕圣菇）
河南省三门峡市渑池县段村乡四龙庙村（牛心柿）
河南省三门峡市卢氏县横涧乡淤泥河村（田宝琏蚕茧）
河南省南阳市南召县云阳镇（苗木花卉）
河南省南阳市西峡县米坪镇（西峡香菇）
河南省南阳市西峡县太平镇（西峡山茱萸）
河南省南阳市西峡县寨根乡（香菇）
河南省南阳市新野县施庵镇渠西村（禾惠万家芥蓝）
河南省商丘市睢阳区五里杨村（西瓜）
河南省商丘市永城市城厢乡冯寨村（冯寨肉牛）
河南省商丘市永城市芒山镇柿元村（兴民国光桃）
河南省商丘市宁陵县石桥镇（酥梨）
河南省商丘市虞城县店集乡惠楼村（惠楼山药）
河南省商丘市虞城县张集镇林堂村（史学锋苹果）
河南省商丘市虞城县郑集乡褚庄村（幸福童依蔬莱）
河南省商丘市夏邑县车站镇（孔祖宴双孢菇）
河南省信阳市浉河区十三里桥乡（苗木花卉）
河南省信阳市浉河区董家河镇（信阳毛尖）
河南省信阳市光山县晏河乡付店村（茶叶）
河南省信阳市固始县泉河铺镇黄堰村（固始甲鱼）
河南省信阳市潢川县卜塔集镇（潢川金桂）
河南省信阳市淮滨县谷堆乡申营村（盛世绿博水果黄瓜）
河南省信阳市息县项店镇邵楼村（香稻丸）
河南省周口市扶沟县柴岗乡梅桥村（新梅园蔬菜）
河南省周口市沈丘县北城区腾营村（槐三宝山药）
河南省周口市沈丘县纸店镇卢庄村（冬枣）
河南省周口市郸城县汲冢镇（薯乐派红薯制品）
河南省周口市淮阳县刘振屯乡（花生）
河南省周口市太康县马厂镇李麦村（花卉苗木育苗）
河南省驻马店市西平县环城乡道庄村（道庄双孢蘑菇）
河南省驻马店市西平县盆尧镇于营村（黄瓜、番茄）
河南省驻马店市上蔡县邵店镇（邵店黄姜）
河南省驻马店市正阳县王勿桥乡黄庄村（正良生猪）
河南省驻马店市正阳县真阳街道办事处（柏雄花生）
河南省驻马店市新蔡县余店镇东王庄村（有机蔬菜）
河南省济源市大峪镇寺朗腰村（寺郎腰大葱）
湖北省武汉经济技术开发区（汉南区）邓南街建新村（鲜食玉米）
湖北省武汉市蔡甸区侏儒山街薛山村（蔡甸藜蒿）
湖北省武汉市江夏区金口街金水一村（金口蔬菜）
湖北省武汉市新洲区徐古街道办事处（徐古双孢菇）
湖北省黄石市阳新县兴国镇宝塔村（春潮湖蒿）
湖北省十堰市张湾区黄龙镇斤坪村（昌洁蔬菜）
湖北省十堰市郧阳区胡家营镇土地沟村（桑绿蚕丝）
湖北省十堰市丹江口市武当山特区八仙观村（武当道茶）
湖北省十堰市竹山县得胜镇圣水村（圣母山茶叶）
湖北省宜昌市夷陵区乐天溪镇石洞坪村（宜昌木姜子）
湖北省宜昌市夷陵区雾渡河镇清江坪村（茶叶）
湖北省宜昌市夷陵区小溪塔街道办仓屋榜村（晓曦红柑橘）
湖北省宜昌市宜都市潘家湾土家族乡（潘家湾富锌茶）
湖北省宜昌市宜都市王家畈镇（宜都宜红茶）
湖北省宜昌市宜都市红花套镇（宜都蜜柑）
湖北省宜昌市当阳市两河镇（长坂坡大蒜）
湖北省宜昌市枝江市七星台镇鸭子口村（鸭子口蔬菜）
湖北省宜昌市远安县旧县镇鹿苑村（鹿苑黄茶）
湖北省宜昌市远安县茅坪场镇（楚蕈香菇）
湖北省襄阳市襄州区龙王镇（昊宇香米）
湖北省襄阳市南漳县肖堰镇周湾村（水镜庄茶叶）
湖北省襄阳市南漳县巡检镇峡口村（峡口柑桔）
湖北省鄂州市鄂城区杜山镇三山村（鱼）
湖北省荆门市东宝区栗溪镇栗树湾村（香菇）
湖北省荆门市钟祥市旧口镇农兴村（七里湖白萝卜）
湖北省荆门市钟祥市张集镇王河村（钟祥香菇）
湖北省荆门市京山县钱场镇舒岭村（神地笼养蛋鸡）
湖北省荆门市京山县永兴镇老柳河村（老柳河龟鳖）
湖北省孝感市孝南区肖港镇（肖港小香葱）
湖北省孝感市应城市汤池镇（中华鳖）
湖北省孝感市安陆市巡店镇（安陆白花菜）
湖北省孝感市汉川市汈汊湖养殖场联南村（汈汊湖中华绒螯蟹）
湖北省孝感市孝昌县丰山镇丰新村（七仙红桃）
湖北省孝感市大悟县三里城镇（大悟绿茶）
湖北省孝感市大悟县新城镇（齐天花生）
湖北省孝感市云梦县城关镇白合村（白合花菜）
湖北省荆州市荆州区川店镇太阳村（肉鸡、蛋鸡、种鸡）
湖北省荆州市荆州区纪南镇（海子湖青鱼）
湖北省荆州市石首市南口镇永福村（南鑫蔬菜）
湖北省荆州市洪湖市螺山镇中原（官墩）村（洪湖清水河蟹）
湖北省荆州市洪湖市乌林镇赤林村（洪湖世元中华鳖）
湖北省荆州市洪湖市燕窝镇四村（姚湖莴苣）
湖北省荆州市洪湖市沙口镇（洪湖再生稻）
湖北省荆州市松滋市八宝镇胜利村（滋宝西瓜）
湖北省荆州市公安县埠河镇天心眼村（荆楚天心眼葡萄）
湖北省荆州市监利县黄歇口镇（青阳宫贡米）
湖北省黄冈市麻城市宋埠镇彭店村（麻城辣椒）
湖北省黄冈市武穴市余川镇芦河村（佛手山药）
湖北省黄冈市英山县杨柳湾镇河南畈村（英山云雾茶）
湖北省咸宁市咸安区汀泗桥镇黄荆塘村（咸安砖茶）
湖北省咸宁市赤壁市茶庵镇（羊楼洞砖茶）
湖北省咸宁市赤壁市官塘驿镇（有机猕猴桃）
湖北省咸宁市嘉鱼县高铁岭镇白果村（嘉博枇杷）
湖北省咸宁市嘉鱼县潘家湾镇（蔬菜）
湖北省咸宁市通城县北港镇枫树村（通城生猪）
湖北省咸宁市崇阳县路口镇高田村（高田肉牛）
湖北省咸宁市通山县大畈镇大坑村（隐水洞枇杷）
湖北省咸宁市通山县南林桥镇石垅村（小龙虾）
湖北省随州市广水市长岭乡红寨村（白玉春萝卜）
湖北省随州市随县安居镇王家沙湾村（皱叶黑白菜）
湖北省随州市随县草店镇（香菇）
湖北省恩施土家族苗族自治州恩施市板桥镇大山顶村（大山鼎蔬菜）
湖北省恩施土家族苗族自治州恩施市屯堡乡花枝山村（恩施玉露）
湖北省恩施土家族苗族自治州恩施市芭蕉乡（茶叶）
湖北省恩施土家族苗族自治州利川市毛坝镇（星斗山利川茶）
湖北省恩施土家族苗族自治州巴东县水布垭镇大面山村（应城辣椒）
湖北省恩施土家族苗族自治州宣恩县椒园镇（伍家台贡茶）
湖北省恩施土家族苗族自治州咸丰县丁寨乡春沟村（苗木花卉）
湖北省恩施土家族苗族自治州来凤县漫水乡油房坳村（茂森缘油茶）
湖北省恩施土家族苗族自治州来凤县三胡乡黄柏村（金祈藤茶）
湖北省仙桃市彭场镇芦林湖村（藕带）
湖北省仙桃市长埫口镇太洪村（太鸿蛙稻）
湖北省仙桃市长埫口镇武旗村（武旗湾毛豆）
湖北省仙桃市张沟镇（沔阳洲黄鳝）
湖北省潜江市积玉口镇古城村（虾稻连作）
湖北省潜江市熊口镇赵脑村（虾小弟小龙虾）
湖北省天门市黄潭镇万场村（万长西甜瓜）
湖北省天门市张港镇（花椰菜）
湖南省长沙市浏阳市淳口镇狮岩村（冠湘竹木）
湖南省长沙市浏阳市永安镇坪头村（永安超米）
湖南省长沙市浏阳市大围山镇（大围山梨）
湖南省长沙市宁乡县沩山镇八角溪村（茶叶）
湖南省株洲市荷塘区仙庾镇蝶屏村（花卉苗木）
湖南省株洲市株洲县龙门镇李家村（蔬菜）
湖南省株洲市株洲县朱亭镇黄龙村（湘春蕨菜）
湖南省株洲市茶陵县湖口镇小潭村（红薯）
湖南省湘潭市湘潭县茶恩寺镇（竹木制品）
湖南省湘潭市湘潭县花石镇（宏兴隆、粒粒珍湘莲）
湖南省衡阳市衡山县店门镇石门村（席草、草席）
湖南省衡阳市祁东县黄土铺镇（祁东黄花菜）
湖南省邵阳市大祥区檀江乡茶元村（蔬菜）
湖南省邵阳市武冈市邓元泰镇凤溪村（凤溪脐橙）
湖南省邵阳市洞口县水东镇高新村（食用菌）
湖南省岳阳市君山区广兴洲镇（蔬菜）
湖南省岳阳市汨罗市桃林寺镇（蓉泰红薯）
湖南省岳阳市临湘市羊楼司镇（林乡竹业制品）
湖南省常德市津市市钟灵村（田家山藠头）
湖南省常德市汉寿县辰阳街道办事处席家咀村（时令蔬菜）
湖南省常德市桃源县茶庵铺镇（桃源野茶王）
湖南省张家界市永定区教字垭镇禹溪村（禹溪金秋梨）
湖南省张家界市永定区尹家溪镇茅溪村（鲜桃）
湖南省益阳市沅江市草尾镇民主村（洋蒜苗）
湖南省益阳市沅江市琼湖街道办事处万子湖村（远征捕捞、水产养殖）
湖南省郴州市资兴市汤溪镇（狗脑贡茶）
湖南省郴州市桂阳县樟市镇（油茶）
湖南省郴州市临武县贝溪村（舜溪香芋）
湖南省永州市零陵区邮亭圩镇对塘坪村（柑桔）
湖南省永州市蓝山县塔峰镇花果村（志昱葡萄）
湖南省永州市江华瑶族自治县大路铺镇兰下村（瑶山雪梨）
湖南省怀化市中方县桐木镇（葡萄）
湖南省怀化市沅陵县官庄镇（碣滩官庄茶叶）
湖南省怀化市靖州苗族侗族自治县坳上镇（靖州杨梅）
湖南省娄底市冷水江市铎山镇眉山村（锦绣嵋山葡萄）
湖南省娄底市双峰县甘棠村盐井村（湘玉竹中药材）
湖南省湘西土家族苗族自治州古丈县默戎镇牛角山村（保靖黄金茶）
湖南省湘西土家族苗族自治州古丈县默戎镇毛坪村（古丈毛尖）
湖南省湘西土家族苗族自治州永顺县高坪乡（鸿丰猕猴桃）
湖南省湘西土家族苗族自治州龙山县里耶镇比耳村（里耶脐橙）
湖南省湘西土家族苗族自治州龙山县石牌镇（百合）
广东省广州市从化区鳌头镇黄茅村（黄茅人甜竹笋）
广东省广州市增城区小楼镇西境村（增城菜心）
广东省韶关市乐昌市九峰镇上廊村（九峰山油桃）
广东省韶关市乐昌市九峰镇茶料村（九峰山柰李）
广东省韶关市始兴县罗坝镇燎原村（蚕茧）
广东省韶关市仁化县大桥镇长坝村（御香源沙田柚）
广东省韶关市仁化县黄坑镇黄坑村（黄坑贡柑）
广东省韶关市新丰县黄磜镇（新丰佛手瓜）
广东省珠海市斗门区莲州镇石龙村（石龙苗木）
广东省汕头市潮南区陇田镇东华村（东华特绿蕉柑）
广东省佛山市高明区杨和镇丽堂新村（丽堂蔬菜）
广东省江门市台山市冲蒌镇（冲蒌黑皮冬瓜）
广东省江门市恩平市牛江镇（马铃薯）
广东省湛江市廉江市长山镇（茗皇茶）
广东省湛江市遂溪县河头镇山域村委会油塘村（罗非鱼）
广东省茂名市电白区沙琅镇（祥寿龟鳖）
广东省茂名市电白区旦场镇（正红鸭蛋）
广东省茂名市化州市平定镇（化橘红）
广东省茂名市信宜市钱排镇（银妃三华李）
广东省肇庆市四会市石狗镇程村村（兰花）
广东省肇庆市怀集县梁村镇（西瓜）
广东省肇庆市德庆县官圩镇五福村（德庆贡柑）
广东省肇庆市德庆县马圩镇诰赠村（贡柑）
广东省惠州市惠东县稔山镇竹园村（马铃薯）
广东省梅州市梅县区石扇镇西南村（金柚）
广东省梅州市梅县区松口镇大黄村（大黄金柚）
广东省梅州市梅县区雁洋镇长教村（雁南飞茶叶）
广东省梅州市兴宁市径南镇浊水村（围龙春乌龙茶）
广东省梅州市大埔县百侯镇侯北村（大埔蜜柚）
广东省梅州市大埔县枫朗镇和村（梅妃蜜柚）
广东省梅州市大埔县高陂镇福员村（王山玉露）
广东省梅州市丰顺县龙岗镇马图村（马山绿茶）
广东省梅州市蕉岭县新铺镇黄坑村（黄坑茶叶）
广东省汕尾市海丰县黄羌镇虎敢村（虎敢金针菜）
广东省汕尾市陆河县南万镇万全村（参天峰白叶单丛茶）
广东省河源市连平县上坪镇中村村（鹰嘴蜜桃）
广东省河源市连平县忠信镇上坣村（忠信花灯）
广东省河源市和平县东水镇增坑畲族村（增坑村皇茶）
广东省河源市和平县下车镇云峰村（下车猕猴桃）
广东省河源市东源县顺天镇（中兴绿丰柠檬）
广东省阳江市阳东区雅韶镇柳西村（双肩玉荷包荔枝）
广东省阳江市阳春市圭岗镇上垌村（蚕桑）
广东省清远市连州市龙坪镇孔围村（鸿星水晶梨）
广东省清远市连州市西岸镇冲口村（连州茶心）
广东省揭阳市揭东区埔田镇（埔田竹笋）
广东省揭阳市普宁市洪阳镇宝镜院村（宝镜院太空花卉）
广东省揭阳市普宁市高埔镇（普宁青梅）
广东省揭阳市揭西县五经富镇五新村（茶叶）
广东省揭阳市惠来县葵潭镇（菠萝）
广东省云浮市罗定市榃滨镇金滩村（肉桂）
广东省云浮市罗定市萃塘镇良官村（海惠蔬菜）
广东省云浮市罗定市泗纶镇（泗纶蒸笼）
广东省云浮市郁南县宝珠镇庞寨村（庞寨黑叶荔枝）
广东省云浮市郁南县建城镇便民村（郁南无核黄皮）
广西壮族自治区荔浦县东昌镇民强村（荔浦芋）
广西壮族自治区永福县龙江乡龙山村（罗汉果）
广西壮族自治区浦北县官垌镇旺（土充）村（官垌鱼）
广西壮族自治区凌云县沙里乡浪伏村（有机白毫茶）
广西壮族自治区田东县祥周镇中平村（香葱）
广西壮族自治区柳州市柳江区成团镇鲁比村（葡萄）
广西壮族自治区柳州市柳江区百朋镇（双季莲藕）
广西壮族自治区桂平市金田镇（淮山山药）
广西壮族自治区靖西县新靖镇旧州村（旧州绣球）
广西壮族自治区田阳县田州镇兴城村（壮乡红番茄）
广西壮族自治区三江县八江乡布央村（三江春茶叶）
广西壮族自治区容县容州镇千秋村（容县沙田柚）
广西壮族自治区陆川县大桥镇陆透村（陆川猪）
广西壮族自治区灵山县文利镇（百强水牛奶）
广西壮族自治区恭城县莲花镇势江村（恭城月柿）
广西壮族自治区岑溪市筋竹镇（砂糖桔）
广西壮族自治区三江侗族自治县丹洲镇丹洲村（休闲农业）
广西壮族自治区灌阳县新街镇江口村（灌阳雪梨）
广西壮族自治区富川瑶族自治县葛坡镇马槽村（富川脐橙）
广西壮族自治区藤县古龙镇（八角）
广西壮族自治区北海市银海区福成镇宁海村（北甜一号哈密瓜）
广西壮族自治区玉林市玉州区仁东镇大鹏村（仁东香蒜）
广西壮族自治区昭平县走马乡福行村（将军红茶叶）
广西壮族自治区天峨县八腊瑶族乡五福村（龙滩珍珠李）
广西壮族自治区田阳县田州镇东江村（桂佳芒果）
广西壮族自治区忻城县马泗乡马泗村（马泗果蔬）
广西壮族自治区容县容州镇木井村（铁皮石斛）
广西壮族自治区隆安县那桐镇定江村（绿水江香蕉）
广西壮族自治区灌阳县灌阳镇大仁村（灌阳雪梨）
广西壮族自治区南丹县六寨镇龙马村（六龙岩赤茶叶）
广西壮族自治区田阳县田州镇（壮乡红番茄）
广西壮族自治区贺州市八步区贺街镇（贺街淮山）
广西柳州市融安县大将镇（金桔）
广西壮族自治区藤县和平镇（粉葛）
广西壮族自治区兴安县漠川乡（川珠王葡萄）
广西壮族自治区忻城县城关镇（珍珠糯玉米）
广西壮族自治区忻城县北更乡（八寨金银花）
广西壮族自治区横县校椅镇石井村（南宁周顺来茉莉花）
广西壮族自治区田林县八渡瑶族乡博峨村（平作八渡笋）
广西壮族自治区灌阳县灌阳镇长坪村（灌阳雪梨）
广西壮族自治区灵川县潭下镇合群村（伊泉沙糖桔）
广西壮族自治区浦北县小江镇公家村（浦百百香果）
广西壮族自治区西林县古障镇西舍村（京桂古道绿茶）
广西壮族自治区田阳县田州镇龙河村（伟农番茄）
广西壮族自治区贺州市八步区贺街镇双瑞村（临贺淮山）
广西壮族自治区南丹县月里镇巴峨村（溪谷源记大米）
广西壮族自治区恭城瑶族自治县莲花镇（恭城月柿）
广西壮族自治区富川瑶族自治县福利镇（富川脐橙）
广西壮族自治区凌云县加尤镇百陇村（凌云白毫茶）
广西壮族自治区南丹县芒场镇巴平村（南丹巴平米）
广西壮族自治区田东县林逢镇东养村（百色芒果）
广西壮族自治区灌阳县新圩镇合睦村（黑李）
广西壮族自治区灵山县平南镇桃禾村（茶叶）
广西壮族自治区容县灵山镇旺维村（清香蜜桔）
广西壮族自治区西林县足别瑶族苗族乡央龙村（足龙茶）
广西壮族自治区钦州市钦南区那丽镇殿艮村（辣椒、黄瓜）
广西壮族自治区那坡县百南乡上隆村（西贡蕉）
广西壮族自治区富川县古城镇高路村（富香壹佰有机大米）
海南省万宁市礼纪镇三星村（豇豆）
海南省万宁市龙滚镇（龙滚菠萝）
海南省屯昌县西昌镇群星村（天涯一号山鸡）
海南省屯昌县枫木镇（枫绿苦瓜）
海南省澄迈县桥头镇沙土村（地瓜）
海南省昌江黎族自治县十月田镇姜园村（圣女果）
海南省陵水黎族自治县光坡镇武山村（陵水圣女果）
海南省乐东黎族自治县佛罗镇福塘村（大棚哈密瓜）
海南省琼中县和平镇长兴村（槟榔）
重庆市万州区太安镇凤凰村（茶乡香米 ）
重庆市万州区甘宁镇永胜村（玫瑰香橙）
重庆市万州区孙家镇兰草村（三峡佛印茶）
重庆市涪陵区珍溪镇西桥村（榨菜）
重庆市南岸区广阳镇回龙桥村（广迥枇杷）
重庆市北碚区静观镇（素心腊梅）
重庆市綦江区隆盛镇中桥村（正浩蔬菜）
重庆市綦江区石壕镇万隆村（花坝糯玉米）
重庆市綦江区赶水镇石房村（萝卜）
重庆市綦江区赶水镇（赶水草蔸萝卜）
重庆市万盛经开区青年镇（滴翠剑名）
重庆市万盛经开区青年镇堡堂村（堡堂蜜柚）
重庆市渝北区茨竹镇大面坡村（青椒）
重庆市渝北区茨竹镇放牛坪村（放牛坪香梨）
重庆市渝北区大盛镇天险洞村（天险洞蘑菇）
重庆市渝北区大湾镇太和村（淡水鱼）
重庆市渝北区统景镇印盒村（歪嘴李）
重庆市江津区吴滩镇现龙村（江津花椒）
重庆市江津区先锋镇（江津花椒）
重庆市合川区渭沱镇七星村（涪江绿蔬菜）
重庆市合川区太和镇米市村（鲜苦瓜等蔬菜）
重庆市合川区双凤镇黄池村（皇池李李子）
重庆市永川区南大街街道办事处黄瓜山村（黄瓜山梨）
重庆市南川区头渡镇前星村（金佛山玄参）
重庆市南川区德隆乡茶树村（南川大树茶）
重庆市南川区德隆乡银杏村（金佛山蜂蜜）
重庆市南川区庆元乡飞龙村（南川鸡）
重庆市璧山区大兴镇连生村（璧山葡萄）
重庆市璧山区七塘镇跃进村（璧北蔬菜）
重庆市潼南区桂林街道办事处（蔬菜）
重庆市荣昌区盘龙镇长岭村（生姜）
重庆市开州区长沙镇锦橙社区（春橙72－1柑橘）
重庆市开州区长沙镇兴农村（开县春橙）
重庆市梁平区合兴镇（梁平柚子）
重庆市梁平区礼让镇川西村（康乐黄桑鱼）
重庆市梁平区云龙镇三清村（殷佳坝萝卜）
重庆市梁平区屏锦镇腰塘村（“雨雷”牌鸡蛋）
重庆市彭水县郁山镇（郁山晶丝苕粉）
重庆市彭水苗族土家族自治县新田镇（红薯）
重庆市彭水县岩东乡（渝佳晚熟清脆李）
重庆市彭水县鞍子镇（苗妹香香大米）
重庆市武隆区双河镇（武隆高山蔬菜）
重庆市城口县河鱼乡平溪村（城口山地鸡）
重庆市城口县坪坝镇光明村（红心猕猴桃）
重庆市云阳县农坝镇云峰村（云阳乌天麻）
重庆市云阳县盘龙街道活龙社区（纽荷尔脐橙）
重庆市云阳县养鹿镇（云阳晚橙）
重庆市巫溪县城厢镇酒泉村（酒洲香脆李）
重庆市巫溪县兰英乡西安村（巫溪独活）
重庆市巫溪县塘坊镇梓树村（脱毒马铃薯）
重庆市石柱县龙沙镇永丰村（辣椒）
重庆市石柱县枫木乡（黄连）
重庆市石柱县冷水镇八龙村（莼菜）
四川省成都市龙泉驿区山泉镇（春泉水蜜桃）
四川省成都市青白江区福洪镇杏花村（福洪杏）
四川省成都市郫都区唐元镇锦宁村（唐元韭黄）
四川省成都市郫都区友爱镇农科村（花卉苗木、乡村旅游）
四川省成都市简阳市贾家镇（农阳桃）
四川省成都市金堂县官仓镇（官仓蔬菜）
四川省成都市蒲江县成佳镇同心村（蒲江雀舌）
四川省自贡市贡井区白庙镇（李必祥血橙）
四川省自贡市贡井区建设镇（贡井龙都早香柚）
四川省自贡市贡井区龙潭镇（川龙潭蔬菜）
四川省自贡市荣县古文镇（忆天香蔬菜）
四川省自贡市荣县双古镇（龙都绿茶）
四川省攀枝花市仁和区大田镇片那立村（攀西大田石榴）
四川省攀枝花市米易县丙谷镇（米易早春蔬菜）
四川省泸州市纳溪区护国镇（纳溪特早茶）
四川省泸州市泸县太伏镇（蜀冠龙眼）
四川省泸州市合江县合江镇龙潭村（荔枝）
四川省泸州市合江县虎头乡（真龙荔枝）
四川省泸州市合江县密溪乡（合江真龙柚）
四川省德阳市广汉市兴隆镇（欣竺灵蔬菜）
四川省德阳市罗江区鄢家镇（西蜀云峰蜜柚）
四川省德阳市中江县集凤镇（中江丹参）
四川省绵阳市游仙区凤凰乡木龙村（木龙观胡萝卜）
四川省绵阳市江油市西屏乡桃园村（蒲军獭兔）
四川省绵阳市江油市九岭镇（九禾蔬菜）
四川省绵阳市三台县永新镇崭山村（崭山米枣）
四川省绵阳市三台县花园镇（涪城麦冬）
四川省绵阳市梓潼县许州镇（文昌添宝蜜柚）
四川省广元市昭化区紫云乡紫云村（紫云猕猴桃）
四川省广元市朝天区平溪乡（曾家山蔬菜）
四川省广元市旺苍县木门镇三合村（广元黄茶）
四川省广元市青川县青溪镇阴平村（休闲农业）
四川省广元市苍溪县歧坪镇盐井村（猕猴桃）
四川省遂宁市安居区安居镇塘河村（沙田柚）
四川省内江市市中区永安镇太平寺村（江龙鱼）
四川省内江市东兴区田家镇（紫皮大蒜）
四川省内江市威远县界牌镇南强村（向家岭无花果）
四川省内江市威远县向义镇（向义蔬菜）
四川省内江市资中县公民镇高石坝子村（生猪）
四川省内江市隆昌县响石镇群乐村（古宇湖水产养殖）
四川省乐山市井研县纯复乡（纯丰水产）
四川省乐山市沐川县炭库乡石碑村（茶叶）
四川省乐山市沐川县富和乡（旭峰猕猴桃）
四川省乐山市沐川县利店镇（沐蕊茶叶）
四川省南充市高坪区永安镇青林村（柑桔）
四川省南充市阆中市方山镇雪洞村（雪洞生姜）
四川省南充市南部县定水镇庙子山村（牧加梁葡萄）
四川省南充市西充县古楼镇（充国香桃）
四川省眉山市彭山区观音镇果园村（紫红园葡萄）
四川省眉山市仁寿县文宫镇石家村（枇杷）
四川省眉山市仁寿县新店乡（九道拐柑橘）
四川省眉山市洪雅县中山乡前锋村（雅雨露茶叶）
四川省眉山市丹棱县双桥镇梅湾村（丹棱橘橙）
四川省眉山市青神县白果乡（青神椪柑）
四川省宜宾市南溪区南溪镇莲花村（四川白鹅）
四川省宜宾市高县大窝镇大屋村（早白尖绿茶）
四川省宜宾市高县羊田乡（华早茶叶）
四川省宜宾市珙县底洞镇楠桥村（蚕桑）
四川省广安市华蓥市禄市镇（广安蜜梨）
四川省广安市邻水县石滓乡大步口村（潾山脐橙）
四川省达州市达川区米城乡尖山庙村（米城大米）
四川省达州市万源市青花镇（巴山雀舌）
四川省达州市宣汉县庙安乡（庙安脆红李）
四川省达州市大竹县高明乡同心村（竹香姑食用菌）
四川省达州市大竹县石河镇（大竹苎麻）
四川省雅安市雨城区合江镇（雅安藏茶）
四川省雅安市名山区茅河乡香水村（茶叶、茶苗）
四川省雅安市汉源县双溪乡镇（白凤桃）
四川省巴中市恩阳区关公镇西南村（刘家坡葡萄）
四川省巴中市恩阳区渔溪镇五岭村（渔久猕猴桃）
四川省巴中市南江县杨坝镇罐坝村（南江黄羊）
四川省资阳市安岳县城北乡柳溪村（柠檬）
四川省资阳市安岳县龙台镇石笋村（安岳柠檬）
四川省资阳市安岳县岳阳镇（安岳柠檬）
四川省阿坝藏族羌族自治州汶川县雁门乡芤山村（汶川甜樱桃）
四川省阿坝藏族羌族自治州茂县南新镇罗山村（羌寨苑脆红李）
四川省阿坝藏族羌族自治州松潘县山巴乡上磨村（休闲农业）
四川省阿坝藏族羌族自治州红原县江茸乡茸日玛村（阳噶藏绵羊）
四川省甘孜藏族自治州泸定县新兴乡堡子村（大白菜）
四川省甘孜藏族自治州泸定县烹坝乡黄草坪村（雪域野农苹果）
四川省甘孜藏族自治州九龙县乌拉溪镇偏桥村（绿之源九龙花椒）
四川省凉山彝族自治州盐源县卫城镇（糖心红富士）
四川省凉山彝族自治州会理县鹿厂镇铜矿村（石榴）
四川省凉山彝族自治州宁南县新村乡碧窝村（南丝路蚕茧）
四川省凉山彝族自治州金阳县芦稿镇油房村（金阳青花椒）
四川省凉山彝族自治州雷波县五官乡青杠村（雷波脐橙）
贵州省贵阳市白云区牛场布依族乡蓬莱村（休闲农业）
贵州省贵阳市乌当区百宜镇罗广村（罗广红香米）
贵州省贵阳市清镇市红枫湖镇大冲村（黔山番茄）
贵州省贵阳市清镇市红枫湖镇右七村（红枫葡萄）
贵州省贵阳市息烽县小寨坝镇红岩村（红岩葡萄）
贵州省贵阳市修文县谷堡乡平滩村（修文猕猴桃）
贵州省贵安新区高峰镇王家院村（水晶葡萄）
贵州省贵安新区马场镇林卡村（林卡辣椒）
贵州省六盘水市水城县米箩乡倮么村（黔宏红心猕猴桃）
贵州省六盘水市盘州市普古乡舍烹村（刺梨）
贵州省遵义市新蒲新区虾子镇（辣椒）
贵州省遵义市赤水市长期镇五七村（金钗石斛）
贵州省遵义市桐梓县大河镇七二村（休闲农业）
贵州省遵义市绥阳县小关乡银花村（小关金银花）
贵州省遵义市凤冈县永安镇田坝村（茶叶）
贵州省遵义市湄潭县湄江街道办事处核桃坝村（茶叶）
贵州省遵义市湄潭县湄江街道办事处金花村（遵义红绿茶）
贵州省遵义市湄潭县永兴镇茅坝村（茅贡米）
贵州省安顺市西秀区旧州镇罗官村（正维茶叶）
贵州省安顺市平坝区天龙镇二官村（蔬菜）
贵州省安顺市普定县化处镇化新村（白旗韭黄）
贵州省安顺市普定县猫洞镇新民村（罩子山绿茶）
贵州省安顺市关岭布依族苗族自治县板贵乡坝山村（板贵火龙果）
贵州省安顺市关岭布依族苗族自治县坡贡镇凡化村（坡贡小黄姜）
贵州省毕节市黔西县洪水镇新桥村（腾达食用菌）
贵州省毕节市金沙县清池镇普安村（大方天麻）
贵州省毕节市金沙县清池镇园坪村（清水塘绿茶）
贵州省毕节市威宁彝族回族苗族自治县麻乍镇双胞塘村（辣椒）
贵州省铜仁市江口县闵孝镇（梵乡提红葡萄）
贵州省铜仁市石阡县聚凤仡佬族侗族乡指甲坪村（石阡苔茶）
贵州省铜仁市石阡县五德镇团结村（源优态水蜜桃）
贵州省铜仁市印江土家族苗族自治县缠溪镇湄坨村（梵净山茶）
贵州省黔西南布依族苗族自治州兴义市泥凼镇老寨村（苦丁茶）
贵州省黔西南布依族苗族自治州兴义市则戎乡冷洞村（万峰林金银花）
贵州省黔西南布依族苗族自治州安龙县德卧镇白水河村（安龙金银花）
贵州省黔东南苗族侗族自治州凯里市大风洞乡杉树林村（黔峰原水晶葡萄）
贵州省黔东南苗族侗族自治州黄平县旧州镇东门村（飞云崖蔬菜）
贵州省黔东南布依族苗族自治州施秉县牛大场镇牛大场村（太子参）
贵州省黔东南苗族侗族自治州岑巩县注溪乡六部屯村（杂稻制种）
贵州省黔东南苗族侗族自治州岑巩县注溪镇（思州柚）
贵州省黔东南苗族侗族自治州锦屏县茅坪镇下寨村（茅坪香桔）
贵州省黔东南苗族侗族自治州丹寨县龙泉镇卡拉村（鸟笼）
贵州省黔南布依族苗族自治州都匀市毛尖镇坪阳村（都匀毛尖）
贵州省黔南布依族苗族自治州福泉市金山街道双谷村（金谷福梨）
贵州省黔南布依族苗族自治州荔波县玉屏镇拉岜村（樟江蜜柚）
贵州省黔南布依族苗族自治州贵定县云雾镇（贵定云雾贡茶）
贵州省黔南布依族苗族自治州独山县影山镇翁奇村（奎文阁茶叶）
贵州省黔南布依族苗族自治州长顺县鼓扬镇鼓扬村（长顺绿壳蛋鸡）
贵州省黔南布依族苗族自治州龙里县谷脚镇茶香村（龙里刺梨）
贵州省黔南布依族苗族自治州三都水族自治县普安镇前进村（交梨山野葡萄）
云南省昆明市呈贡区斗南镇斗南村（花卉产业）
云南省曲靖市麒麟区茨营乡茨营村委会（茨营河蔬菜）
云南省曲靖市麒麟区珠街街道中所村（红美珠葡萄）
云南省曲靖市沾益区大坡乡大坡村（万寿菊）
云南省曲靖市宣威市宝山镇安益村（紫云宝马铃薯）
云南省曲靖市师宗县彩云镇足法村（足法辣椒）
云南省曲靖市师宗县高良乡科白村（高良薏仁）
云南省曲靖市罗平县板桥镇（罗平小黄姜）
云南省曲靖市富源县大河镇（富源大河乌猪）
云南省玉溪市华宁县华溪镇（华宁柑桔）
云南省玉溪市新平彝族傣族自治县漠沙镇（漠沙苦瓜）
云南省保山市隆阳区潞江镇登高村（登高坝冬早蔬菜）
云南省保山市隆阳区潞江镇新寨村（保山小粒咖啡）
云南省保山市腾冲市马站乡兴华社区（极边乌龙茶）
云南省保山市龙陵县平达镇小河村（滇珍紫香茶叶）
云南省昭通市昭阳区洒渔镇（昭福苹果）
云南省昭通市昭阳区苏家院镇（昭通苹果）
云南省昭通市鲁甸县龙头山镇（三川半青花椒）
云南省昭通市盐津县敦厚村（盐津乌骨鸡）
云南省丽江市永胜县六德乡营山村（他留乌骨鸡）
云南省丽江市华坪县荣将镇龙头村（芒香源芒果）
云南省普洱市澜沧拉祜族自治县惠民镇（景迈香茶叶）
云南省临沧市凤庆县凤山镇安石村（中国滇红第一村茶叶）
云南省临沧市沧源佤族自治县勐董镇芒摆村（碧丽源有机茶）
云南省楚雄彝族自治州姚安县前场镇新街村（大蒜）
云南省楚雄彝族自治州大姚县三台乡（大姚核桃）
云南省红河哈尼族彝族自治州蒙自市新安所镇（蒙自石榴）
云南省红河哈尼族彝族自治州弥勒市东风农场管理局（弥勒葡萄）
云南省红河哈尼族彝族自治州弥勒市新哨镇里方村（民丰韭黄）
云南省红河哈尼族彝族自治州建水县甸尾乡铁所村（美秀福新马铃薯）
云南省红河哈尼族彝族自治州建水县面甸镇闫把寺村（面甸洋葱）
云南省红河哈尼族彝族自治州石屏县龙朋镇甸中村（结球甘蓝）
云南省文山壮族苗族自治州文山市坝心乡他披村（文山他披梨）
云南省文山壮族苗族自治州砚山县稼依镇小稼依村（咪彩辣椒）
云南省文山壮族苗族自治州砚山县维摩乡倮可者村（辣椒）
云南省文山壮族苗族自治州丘北县树皮乡树皮村（丘北辣椒）
云南省西双版纳傣族自治州景洪市大渡岗乡（大渡岗普洱茶）
云南省西双版纳傣族自治州勐海县布朗山乡班章村（复原昌号有机茶）
云南省西双版纳傣族自治州勐海县勐遮镇曼根村（曼根傣贡稻米）
云南省大理白族自治州宾川县宾居镇（宾川柑桔）
云南省大理白族自治州宾川县金牛镇（宾川红提葡萄）
云南省大理白族自治州云龙县宝丰乡大栗树村（云龙绿茶）
云南省大理白族自治州漾濞彝族自治县苍山西镇光明村（漾濞大波核桃）
云南省大理白族自治州巍山彝族回族自治县马鞍山乡三胜村（巍山红雪梨）
云南省德宏傣族景颇族自治州芒市遮放镇（遮放贡米）
云南省德宏傣族景颇族自治州瑞丽市勐秀镇勐典村（红瑞柠檬）
云南省德宏傣族景颇族自治州梁河县大厂乡回龙寨村（梁河回龙茶）
西藏自治区拉萨市蔡公堂乡白定村（果蔬）
西藏自治区拉萨市堆龙德庆区古荣乡巴热村（巴热糌粑）
西藏自治区拉萨市堆龙德庆区古荣乡嘎冲村（堆龙藏鸡）
西藏自治区拉萨市堆龙德庆区乃琼镇岗德林村（蔬菜、花卉）
西藏自治区拉萨市尼木县吞巴乡吞达村（吞弥圣香藏香）
西藏自治区拉萨市达孜县雪乡扎西岗村（“布塑”面具）
西藏自治区日喀则市南木林县艾玛乡山巴村（艾玛土豆）
西藏自治区日喀则市江孜县江热乡白伦村（江孜大蒜）
西藏自治区日喀则市白朗县嘎东镇贵热村（罗旦糌粑）
西藏自治区日喀则市仲巴县霍尔巴乡玉来村（霍尔巴绵羊）
西藏自治区日喀则市岗巴县直克乡乃村（岗巴羊）
西藏自治区昌都市柴维乡翁达岗村（佛像制作）
西藏自治区昌都市贡觉县阿旺乡（阿旺绵羊）
西藏自治区昌都市左贡县旺达镇木龙村（古琼藏香）
西藏自治区昌都市芒康县纳西民族乡纳西村（葡萄）
西藏自治区林芝市布久乡甲日卡村（苹果）
西藏自治区林芝市工布江达县错高镇错高村（藏香猪）
西藏自治区林芝市察隅县下察隅镇（察隅香米）
西藏自治区林芝市朗县洞嘎镇滚村（郎敦红辣椒）
西藏自治区山南市扎囊县扎其乡申藏村（木雕工艺品）
西藏自治区山南市琼结县加麻乡白松村（半细绵羊）
西藏自治区山南市加查县冷达乡嘎玛吉塘村（蓝莓）
西藏自治区山南市隆子县隆子镇扎果村（聂雄奶牛）
西藏自治区那曲地区那曲县罗玛镇4村（畜产品）
西藏自治区阿里地区日土县热帮乡龙门卡村（绒山羊）
陕西省西安市灞桥区狄寨街道办事处（灞桥葡萄）
陕西省西安市阎良区关山镇（馥康甜瓜）
陕西省西安市临潼区骊山街办胡王村（石榴）
陕西省西安市长安区王莽街道办事处（王莽鲜桃）
陕西省西安市鄠邑区草堂镇叶寨村（户县葡萄）
陕西省西安市鄠邑区蒋村镇同兴村（大棚瓜菜）
陕西省西安市蓝田县华胥镇阿氏村（娲氏大杏）
陕西省西安市周至县楼观镇（周至猕猴桃）
陕西省西安市周至县楼观镇周一村（周一村猕猴桃）
陕西省西安市周至县马召镇（周至猕猴桃）
陕西省西安市周至县马召镇西富饶村（猕猴桃）
陕西省西安市周至县司竹镇骆驼营村（周山至水猕猴桃）
陕西省铜川市新区正阳路办事处陈坪村（维美大樱桃）
陕西省铜川市耀州区石柱镇马咀村（锦阳湖果蔬）
陕西省铜川市王益区黄堡镇孟家塬村（桃、柿子）
陕西省铜川市王益区王益街道办塬畔村（大樱桃、草莓）
陕西省铜川市印台区陈炉镇（陈炉陶瓷）
陕西省铜川市印台区广阳镇（铜川苹果）
陕西省宝鸡市金台区马家原村（马家原葡萄）
陕西省宝鸡市陈仓区慕仪镇（四季佳禾蔬菜）
陕西省宝鸡市凤翔县范家寨镇（雍州苹果）
陕西省宝鸡市岐山县蔡家坡镇唐家岭村（岐安唐猕猴桃）
陕西省宝鸡市扶风县天度镇永平村（乔山红苹果）
陕西省宝鸡市眉县金渠镇第二坡村（猕猴桃）
陕西省宝鸡市眉县金渠镇（金桥猕猴桃）
陕西省宝鸡市千阳县南寨镇三合村（西秦竞秀苹果）
陕西省宝鸡市凤县平木镇（秦岭部落蔬菜）
陕西省宝鸡市太白县咀头镇塘口村（太白山蔬菜）
陕西省杨凌示范区区大寨乡官村（西甜瓜蔬菜）
陕西省咸阳市杨凌示范区揉谷镇新集村（葡鑫葡萄）
陕西省咸阳市杨凌示范区杨陵街道办事处崔东沟村（东沟圣果猕猴桃）
陕西省咸阳市渭城区周陵社区严家沟村（葡萄）
陕西省咸阳市兴平市西吴街道办来祁寨村（汉茂油桃）
陕西省咸阳市三原县鲁桥镇（鲁桥蔬菜）
陕西省咸阳市泾阳县云阳镇花马村（蔬菜）
陕西省咸阳市泾阳县云阳镇（泾云蔬菜）
陕西省咸阳市乾县漠西社区夹道村（大葱）
陕西省咸阳市礼泉县西张堡镇白村（苹果）
陕西省咸阳市礼泉县烟霞镇袁家村（休闲农业）
陕西省咸阳市礼泉县昭陵社区前山村（石榴）
陕西省咸阳市旬邑县张洪镇（旬宝苹果）
陕西省咸阳市武功县贞元镇南可村（南可手织布）
陕西省渭南市临渭区官道镇武赵村（渭乐天冬枣）
陕西省渭南市临渭区下吉镇见庄村（秦浓红提葡萄）
陕西省渭南市临渭区向阳办赤水村（大樱桃）
陕西省渭南市临渭区官路镇（绿泰果蔬）
陕西省韩城市王峰镇李家山村（冶户川花椒）
陕西省渭南市韩城市西庄镇道口梁村（满山红花椒）
陕西省渭南市韩城市昝村镇史带村（临河蔬菜）
陕西省渭南市韩城市桑树坪镇王峰村（韩城大红袍花椒）
陕西省渭南市华阴市华西镇北洛村（红提）
陕西省渭南市大荔县埝桥镇黄营村（果蔬）
陕西省渭南市大荔县羌白镇白村（大荔冬枣）
陕西省渭南市澄城县王庄镇水洼村（秦平苹果）
陕西省渭南市澄城县庄头镇郭家庄村（真仕佳红樱桃）
陕西省渭南市澄城县庄头镇（真仕佳大樱桃）
陕西省渭南市蒲城县龙池镇（富秦文俊西甜瓜）
陕西省渭南市富平县富平县曹村镇马坡村（柿饼）
陕西省渭南市富平县富平县张桥镇（富郁香甜瓜）
陕西省延安市宝塔区临镇镇任家塬村（宝塔山地苹果）
陕西省延安市安塞区建华镇桥坪村（大棚茄子）
陕西省延安市安塞区沿河湾镇（沿河湾大棚瓜菜）
陕西省延安市洛川县凤栖镇谷咀村（休闲农业）
陕西省延安市洛川县旧县镇（洛川苹果）
陕西省延安市洛川县永乡镇（甘甜心苹果）
陕西省延安市延川县文安驿镇梁家河村（苹果）
陕西省延安市延川县延水关镇东村（延川红枣）
陕西省延安市宜川县丹洲镇圪崂村（苹果）
陕西省汉中市汉台区河东店镇花果村（褒河蜜桔）
陕西省汉中市汉台区铺镇镇狮子村（天之源蔬菜）
陕西省汉中市汉台区铺镇（蔬菜）
陕西省汉中市南郑县牟家坝镇云峰寺村（绿茶）
陕西省汉中市城固县桔园镇郭家山村（柑桔）
陕西省汉中市城固县三合镇陈丁村（蔬菜）
陕西省汉中市城固县桔园镇（泛亚柑桔）
陕西省汉中市西乡县峡口镇江榜村（汉中仙毫）
陕西省汉中市勉县勉阳镇黄家沟村（天荡山硒果）
陕西省汉中市勉县漆树坝镇漆树坝村（汉中仙毫）
陕西省榆林市榆阳区鱼河镇南沙村（时令果蔬）
陕西省榆林市榆阳区鱼河镇寺伙沟村（蔬菜）
陕西省榆林市榆阳区鱼河镇（时令水果）
陕西省榆林市神木县贺家川镇温家川村（果蔬）
陕西省榆林市靖边县东坑镇黄家峁村（鸿丰蔬菜）
陕西省榆林市靖边县东坑镇（鸿丰胡萝卜）
陕西省榆林市定边县白泥井镇（白泥井蔬菜）
陕西省榆林市子洲县周家硷镇后湾村（纯洋芋粉条）
陕西省安康市汉阴县城关镇大兴村（休闲农业）
陕西省安康市汉阴县涧池镇紫云村（紫硒蔬菜）
陕西省安康市石泉县池河镇明星村（生猪）
陕西省安康市紫阳县焕古镇焕古村（紫阳富硒茶）
陕西省安康市平利县长安镇高峰村（女娲绿茶）
陕西省安康市平利县长安镇（女娲峰绿茶）
陕西省安康市旬阳县吕河镇冬青村（冬青村狮头柑）
陕西省商洛市商州区牧护关镇闵家河村（秦盛马铃薯）
陕西省商洛市洛南县城关街道办事处尖角村（尖角蔬菜）
陕西省商洛市洛南县石门镇（洛南核桃）
陕西省商洛市丹凤县棣花镇万湾村（万湾李蔬菜）
陕西省商洛市商南县富水镇王家庄村（蔬菜）
陕西省商洛市商南县试马镇（秦园春茶）
陕西省商洛市山阳县漫川关镇万福村（江祝绿茶）
陕西省商洛市镇安县达仁镇象园村（镇安象园茶）
甘肃省兰州市七里河区西果园镇（兰州百合）
甘肃省兰州市永登县柳树镇韩家井村（红提葡萄）
甘肃省金昌市金川区宁远堡镇新华村（茄子）
甘肃省金昌市城关镇大坝村（今农青笋）
甘肃省金昌市永昌县城关镇金川东村（永昌胡萝卜）
甘肃省金昌市永昌县水源镇方沟村（设施农业）
甘肃省白银市靖远县糜滩乡下滩村（辣椒）
甘肃省白银市会宁县头寨子镇牛河村（甘富苹果）
甘肃省白银市景泰县草窝滩镇西和村（黄河石林枸杞）
甘肃省白银市景泰县五佛兴水村（红枣）
甘肃省天水市秦州区玉泉镇烟铺村（大樱桃）
甘肃省天水市麦积区伯阳镇曹石村（曹石苹果）
甘肃省天水市麦积区伯阳镇（花牛苹果）
甘肃省天水市秦安县刘坪镇何湾村（秦安蜜桃）
甘肃省天水市武山县马力镇北顺村（北顺黄瓜）
甘肃省武威市凉州区大柳镇大柳村（西瓜）
甘肃省武威市凉州区发放镇（发放蔬菜）
甘肃省武威市民勤县蔡旗镇沙滩村（小乳瓜）
甘肃省武威市古浪县黄花滩镇黄花滩村（土门羔羊肉）
甘肃省张掖市甘州区梁家墩镇五号村（梁家墩蔬菜）
甘肃省张掖市甘州区明永乡沿河村（绿涵高原夏菜）
甘肃省张掖市甘州区上秦镇徐赵寨村（陇上春绿娃娃菜）
甘肃省张掖市甘州区乌江镇天乐村（祁沅春蔬菜制种）
甘肃省平凉市崆峒区白庙回族乡柴寺村（柴寺红牛）
甘肃省平凉市泾川县红河乡柳王村（番茄）
甘肃省平凉市崇信县锦屏镇九功村（黄瓜）
甘肃省平凉市华亭县马峡镇蒋庄村（华亭独活）
甘肃省平凉市静宁县李店镇常坪村（静宁苹果）
甘肃省酒泉市玉门市赤金镇（沁馨韭菜）
甘肃省酒泉市敦煌市阳关镇（无核白葡萄）
甘肃省庆阳市西峰区肖金镇米王村（蔬菜、瓜果）
甘肃省庆阳市西峰县温泉镇（陇宝苹果）
甘肃省庆阳市庆城县赤城镇（庆阳苹果）
甘肃省庆阳市合水县何家畔镇（庆阳苹果）
甘肃省定西市安定区鲁家沟镇花岔村（鲁家沟马铃薯）
甘肃省定西市陇西县首阳镇首阳村（中药材）
甘肃省定西市陇西县云田镇安家咀村（陇原裕新菌菜）
甘肃省定西市临洮县洮阳镇兴荣村（胡萝卜）
甘肃省陇南市武都区郭河乡（陇南花椒）
甘肃省陇南市康县阳坝镇宋沟村（茗芝翠竹）
甘肃省陇南市礼县永兴镇捷地村（礼县苹果）
甘肃省陇南市徽县嘉陵镇田河村（徽县银杏）
甘肃省临夏回族自治州临夏县先锋乡丁韩村（蔬菜）
甘肃省临夏回族自治州永靖县关山乡南堡村（兰州百合）
甘肃省临夏回族自治州永靖县杨塔乡徐湾村（马铃薯）
甘肃省甘南藏族自治州玛曲县阿万仓镇贡赛村（牦牛）
甘肃省甘南藏族自治州玛曲县欧拉镇安茂村（欧拉藏羊）
甘肃省甘南藏族自治州夏河县甘加乡仁青村（甘加藏羊）
青海省西宁市城北区大堡子镇陶北村（休闲农业）
青海省化隆县德恒隆乡石乃海村（卡日岗土鸡）
青海省乐都县共和乡大庄村（紫皮大蒜）
青海省都兰县宗加镇（枸杞）
青海省湟源县申中乡立达村（三红胡萝卜）
青海省湟源县申中乡前沟村（河湟瑶池红树莓）
青海省互助县塘川镇（金塘川蔬菜）
青海省乐都县高店镇（乐都紫皮大蒜）
青海省乐都县寿乐镇王佛寺村（乐都长辣椒）
青海省循化县查汗都斯乡新村（仙红线辣椒）
青海省化隆县牙什尕镇牙什尕村（宝河源虹鳟鱼）
青海省都兰县宗加镇诺木洪村（杞海枸杞）
青海省祁连县默勒镇扎沙村（祁连藏羊）
青海省大通县新庄镇新庄村（黄瓜）
青海省湟中县鲁沙尔镇下重台村（蔬菜）
青海省湟中县拦隆口镇下鲁尔村（蒜苗）
青海省互助县台子乡多士代村（生猪）
青海省互助县松多乡马营村位（土鸡）
青海省乐都县高庙镇旱地湾村（韭菜）
青海省乐都县雨润镇深沟村（紫皮大蒜）
青海省贵德县河东乡王屯村（牛羊育肥）
青海省都兰县香日德镇乐盛村（马铃薯）
青海省格尔木市大格勒乡（枸杞）
青海省门源县北山乡沙沟脑村（油菜籽）
青海省祁连县野牛沟镇边麻村（牦牛）
青海省大通县塔尔镇上旧庄村（老爷山番茄）
青海省湟源县城关镇涌兴村（大葱）
青海省湟中县田家寨镇李家台村（奶牛）
青海省湟中县李家山镇董家湾村（蔬菜）
青海省互助县塘川镇董家村（互宝八眉猪）
青海省德令哈市柯鲁柯镇晨光村（晨堉蔬菜）
青海省德令哈市怀头他拉镇（怀头他拉绒山羊）
青海省都兰县香日德镇小夏滩村（柴达木枸杞）
青海省贵德县河西镇园艺村（贵德长把梨）
青海省玛多县玛查理镇玛拉驿村（玛多藏羊）
青海省湟中县拦隆口镇上寺村（梓琪黄瓜）
青海省湟中县李家山镇下西河村（谷丰民园丝瓜）
青海省民和县峡山镇峡门村（峡门蛋鸡）
青海省海东市乐都区雨润镇刘家村（乐都紫皮大蒜）
青海省化隆县雄先乡乙麻昂村（三江鱼鳟鱼）
青海省贵德县尕让乡黄河滩村（黄河清蔬菜）
青海省泽库县和日镇东格日村（东歌草原生态旅游）
青海省大通县朔北乡代同庄村（老爷山甘蓝）
青海省湟源县日月乡山根村（山根马蘭青蒜苗）
青海省互助县台子乡哇麻村（葱花土鸡）
青海省海东市乐都区中坝乡何家山村（乐都藏香猪）
青海省海东市乐都区李家乡西马营村（乐都洋芋）
青海省贵德县尕让乡二连村（休闲农业）
青海省玛多县花石峡镇日谢村（玛多藏羊）
宁夏回族自治区银川市兴庆区掌政镇茂盛村（番茄）
宁夏回族自治区银川市兴庆区掌政镇镇河村（番茄）
宁夏回族自治区银川市灵武市东塔镇（灵武长红枣）
宁夏回族自治区银川市灵武市郝家桥镇上滩村（上滩鑫韭菜）
宁夏回族自治区银川市兴庆区贺兰县习岗镇新平村（设施瓜菜）
宁夏回族自治区石嘴山市惠农区庙台乡李岗村（李岗西瓜）
宁夏回族自治区石嘴山市平罗县高仁乡六顷地村（乐海山沙漠西瓜）
宁夏回族自治区石嘴山市平罗县头闸镇西永惠村（蔬菜制种）
宁夏回族自治区石嘴山市平罗县通伏乡（优质大米）
宁夏回族自治区吴忠市利通区高闸镇（马兴西瓜）
宁夏回族自治区吴忠市利通区郭家桥乡（回乡刘湾葡萄）
宁夏回族自治区吴忠市青铜峡市小坝镇先锋村（先锋葡萄）
宁夏回族自治区吴忠市青铜峡市叶盛镇地三村（地三大米）
宁夏回族自治区吴忠市盐池县青山乡古峰庄村（滩羊）
宁夏回族自治区吴忠市盐池县花马池镇李记沟村（盐池滩羊）
宁夏回族自治区吴忠市盐池县惠安堡镇隰宁堡村（惠萱王黄花菜）
宁夏回族自治区吴忠市盐池县冯记沟乡平台村（盐池滩羊肉）
宁夏回族自治区吴忠市盐池县麻黄山乡包源村（盐池荞麦、糜子、谷子）
宁夏回族自治区吴忠市同心县王团镇吊堡子村（枸杞）
宁夏回族自治区固原市原州区头营镇石羊村（万武牛肉）
宁夏回族自治区固原市原州区彭堡镇姚磨村（六盘清水河娃娃菜）
宁夏回族自治区固原市原州区张易镇（马铃薯）
宁夏回族自治区固原市西吉县吉强镇万崖村（西吉芹菜）
宁夏回族自治区固原市西吉县吉强镇杨坊村（西吉芹菜）
宁夏回族自治区固原市西吉县将台堡镇明荣村（西吉芹菜）
宁夏回族自治区固原市西吉县火石寨乡沙岗村（马铃薯）
宁夏回族自治区固原市隆德县联财镇联财村（六盘磬辣椒）
宁夏回族自治区固原市隆德县联财镇赵楼村（隆珍杰中药材）
宁夏回族自治区固原市泾源县大湾乡何堡村（肉牛）
宁夏回族自治区固原市泾源县泾河源镇龙潭村（肉牛）
宁夏回族自治区固原市泾源县泾河源镇冶家村（农家乐）
宁夏回族自治区固原市泾源县兴盛乡上金村（肉牛）
宁夏回族自治区固原市彭阳县古城镇任河村（雪花牛肉）
宁夏回族自治区固原市彭阳县红河乡友联村（辣椒）
宁夏回族自治区中卫市沙坡头区兴仁镇兴仁村（香山硒砂瓜）
宁夏回族自治区中卫市沙坡头区东园镇韩闸村（韩闸拱棚韭菜）
宁夏回族自治区中卫市沙坡头区香山乡（香山硒砂瓜）
宁夏回族自治区中卫市中宁县舟塔乡（枸杞）
宁夏回族自治区中卫市中宁县舟塔乡舟塔村（中宁枸杞）
宁夏回族自治区中卫市海原县高崖乡草场村（西甜瓜）
宁夏回族自治区中卫市海原县关桥乡冯湾村（海原西甜瓜）
宁夏回族自治区中卫市海原县关庄乡关庄村（海原马铃薯）
宁夏回族自治区中卫市海原县西安乡园河村（天都山小茴香）
新疆维吾尔自治区乌鲁木齐市乌鲁木齐县水西沟镇东湾村（草莓）
新疆维吾尔自治区乌鲁木齐市乌鲁木齐县水西沟镇平西梁村（休闲农业）
新疆维吾尔自治区吐鲁番市高昌区亚尔镇亚尔果勒村（葡萄）
新疆维吾尔自治区吐鲁番市鄯善县辟展乡卡格托尔村（葡萄）
新疆维吾尔自治区吐鲁番市托克逊县郭勒布依乡硝尔村（韭菜）
新疆维吾尔自治区吐鲁番市高昌区亚尔镇老城东门村（葡萄）
新疆维吾尔自治区哈密市巴里坤县奎苏镇（马铃薯）
新疆维吾尔自治区哈密市巴里坤县三塘湖镇（哈密瓜）
新疆维吾尔自治区哈密市伊吾县淖毛湖镇（哈密瓜）
新疆维吾尔自治区哈密市伊吾县盐池镇（途阔羊肉）
新疆维吾尔自治区阿克苏地区阿克苏市库木巴什镇托万克喀日纳斯村（核桃）
新疆维吾尔自治区阿克苏地区阿克苏市托普鲁克乡尤喀克喀拉喀勒村（红枣）
新疆维吾尔自治区阿克苏地区沙雅县塔里木乡仓塔木村（甜瓜）
新疆维吾尔自治区阿克苏地区沙雅县盖孜库木乡（有机绒山羊）
新疆维吾尔自治区阿克苏地区沙雅县海楼镇（红枣）
新疆维吾尔自治区阿克苏地区乌什县乌什镇南关村（蔬菜）
新疆维吾尔自治区喀什地区喀什市色满乡阿塔古村（博瑞树莓）
新疆维吾尔自治区喀什地区泽普县古勒巴格乡阿热买里村（核桃）
新疆维吾尔自治区喀什地区泽普县园艺场恰卡尔村（苹果）
新疆维吾尔自治区喀什地区莎车县荒地镇布瓦库木村（甜瓜）
新疆维吾尔自治区喀什地区莎车县米夏乡夏玛勒巴格村（樱桃）
新疆维吾尔自治区叶城县萨依巴格乡霍伊拉坎特村（核桃）
新疆维吾尔自治区喀什地区巴楚县琼库恰克乡赛克散库足克村（西瓜）
新疆维吾尔自治区和田地区皮山县皮亚勒玛乡兰干库勒村（皮亚曼石榴）
新疆维吾尔自治区和田地区皮山县皮亚勒玛乡乌堂村（皮亚勒玛甜石榴）
新疆维吾尔自治区昌吉回族自治州昌吉市佃坝乡土梁村（蔬菜）
新疆维吾尔自治区昌吉回族自治州吉木萨尔县北庭镇古城村（辣椒）
新疆维吾尔自治区昌吉回族自治州木垒县东城镇沈家沟村（鹰嘴豆）
新疆维吾尔自治区巴音郭楞蒙古自治州库尔勒市阿瓦提乡其盖克其克村（香梨）
新疆维吾尔自治区巴音郭楞蒙古自治州且末县库拉木勒克乡江尕勒萨依村（江尕勒萨依大蒜）
新疆维吾尔自治区巴音郭楞蒙古自治州若羌县瓦石峡乡（楼兰红枣）
新疆维吾尔自治区巴音郭楞蒙古自治州和硕县苏哈特乡苏哈特村（特色蔬菜）
新疆维吾尔自治区巴音郭楞蒙古自治州博湖县本布图镇再格森诺尔村（蔬菜）
新疆维吾尔自治区克孜勒苏柯尔克孜自治州阿克陶县皮拉勒乡墩都拉村（帕米尔水晶绿甜瓜）
新疆维吾尔自治区克孜勒苏柯尔克孜自治州阿克陶县巴仁乡（杏子）
新疆维吾尔自治区伊犁哈萨克自治州伊宁市达达木图乡（蔬菜）
新疆维吾尔自治区伊犁哈萨克自治州伊宁市多浪农场农三队（伊多红葡萄）
新疆维吾尔自治区伊犁哈萨克自治州霍尔果斯市莫乎尔乡（葡萄）
新疆维吾尔自治区伊犁哈萨克自治州特克斯县乔拉克铁热克镇阿克铁热克村（苹果）
新疆维吾尔自治区塔城地区沙湾县安集海镇葡萄园子村（辣椒）
新疆维吾尔自治区塔城地区裕民县察汗托海牧场喀拉克米尔村（无刺红花）
新疆维吾尔自治区塔城地区裕民县江格斯乡吉兰德村（巴士拜羊）
新疆维吾尔自治区阿勒泰地区富蕴县可可托海镇塔拉特村（黑加仑）
新疆维吾尔自治区阿勒泰地区富蕴县可可托海镇（黑加仑）
新疆生产建设兵团第一师阿拉尔市3团（大漠绿岛核桃）
新疆生产建设兵团第一师阿拉尔市13团（伊人三枣）
新疆生产建设兵团第一师阿拉尔市11团（昆岗红枣）
新疆生产建设兵团第一师阿拉尔市5团（天山玉苹果）
新疆生产建设兵团第二师铁门关市33团（塔里木垦区马鹿茸）
新疆生产建设兵团第二师铁门关市27团（天湖啤酒花）
新疆生产建设兵团第二师铁门关市25团（博斯腾番茄）
新疆生产建设兵团第二师铁门关市21团（开来红辣椒）
新疆生产建设兵团第二师铁门关市31团（塔禾罗布麻茶）
新疆生产建设兵团第四师可克达拉市61团（天伊树上干杏）
新疆生产建设兵团第四师可克达拉市69团（“香极地”天然香料）
新疆生产建设兵团第四师可克达拉市70团（伊珠葡萄酒）
新疆生产建设兵团第五师双河市83团园艺2连（博乐红提）
新疆生产建设兵团第五师双河市84团（怪石峪菊花）
新疆生产建设兵团第六师五家渠市军户农场2连（新疆虹葡萄）
新疆生产建设兵团第八师石河子市121团13连（甜瓜）
新疆生产建设兵团第八师石河子市134团24连（大樱桃）
新疆生产建设兵团第八师石河子市141团15连（设施蔬菜）
新疆生产建设兵团第八师石河子市145团北泉镇六分场6连（北泉弗雷葡萄）
新疆生产建设兵团第八师石河子市121团炮台镇2连（园禾佳山药）
新疆生产建设兵团第八师石河子市142团良种连（新安生猪）
新疆生产建设兵团第九师团结农场4连（逸飨西红柿、辣椒）
新疆生产建设兵团第十三师红星一场（天山娇葡萄）
新疆生产建设兵团第十四师昆玉市一牧场（有机羊肉）
新疆生产建设兵团第一师阿拉尔市10团（大漠红枣）
新疆生产建设兵团第四师可克达拉市78团（伊帅苹果）
新疆生产建设兵团第八师石河子市152团（酿酒葡萄）
新疆生产建设兵团第十三师淖毛湖农场1连（天山娇哈密瓜）
新疆生产建设兵团第十四师昆玉市224团（昆仑山和田玉枣）
新疆生产建设兵团第十二师222团（冰湖映月酿酒葡萄）
新疆生产建设兵团第七师124团（番茄）
新疆生产建设兵团第二师铁门关市34团（红枣）
新疆生产建设兵团第六师五家渠市103团8连（甜瓜）
新疆生产建设兵团第四师可克达拉市68团（伊香大米）

## Sheet: 0-6
前六批全国一村一品示范村镇监测合格名单							19中国历史文化名镇名单	19中国历史文化名镇名单	一村一品			19中国历史文化名镇名单	19中国历史文化名镇名单	一村一品	前六批全国一村一品示范村镇监测合格名单
上海	嘉定	工业	灯塔村	农灯草莓		德清	0	1	1		德清	0	1	1	上海市嘉定区工业区灯塔村（农灯草莓）
上海	嘉定		马陆镇	葡萄		安吉	0	3	3		安吉	0	3	3	上海市嘉定区马陆镇（葡萄）
上海	浦东新		大团镇多利农庄	多利农庄有机绿叶菜		桐乡	0	1	1		桐乡	0	1	1	上海市浦东新区大团镇多利农庄（多利农庄有机绿叶菜）
上海	浦东新		大团镇赵桥村	水蜜桃		余姚	0	0	0		余姚	0	0	0	上海市浦东新区大团镇赵桥村（水蜜桃）
上海	浦东新		泥城镇马厂村	红刚青扁豆		武义	0	0	0		武义	0	0	0	上海市浦东新区泥城镇马厂村（红刚青扁豆）
上海	浦东新		宣桥镇新安村	香嘭嘭鲜食玉米		萧山	0	1	1		萧山	0	1	1	上海市浦东新区宣桥镇新安村（香嘭嘭鲜食玉米）
上海	浦东新		周浦镇棋杆村	平棋葡萄		慈溪	0	0	0		慈溪	0	0	0	上海市浦东新区周浦镇棋杆村（平棋葡萄）
上海	金山		枫泾镇新义村	锦绣黄桃		苍南	0	0	0		苍南	0	0	0	上海市金山区枫泾镇新义村（锦绣黄桃）
上海	金山		吕巷镇和平村	皇母蟠桃		嘉善	0	2	2		嘉善	0	2	2	上海市金山区吕巷镇和平村（皇母蟠桃）
上海	金山		亭林镇后岗村	亭林雪瓜		东阳	0	0	0		东阳	0	0	0	上海市金山区亭林镇后岗村（亭林雪瓜）
上海	金山		朱泾镇大茫村	珠丰甜瓜		平阳	0	1	1		平阳	0	1	1	上海市金山区朱泾镇大茫村（珠丰甜瓜）
上海	松江		永丰街道镇盐仓村	仓桥水晶梨		浦江	0	0	0		浦江	0	0	0	上海市松江区永丰街道镇盐仓村（仓桥水晶梨）
上海	青浦		夏阳街道塘郁村	沪香枇杷		温岭	0	1	1		温岭	0	1	1	上海市青浦区夏阳街道塘郁村（沪香枇杷）
上海	青浦		白鹤镇	赵屯桥草莓		诸暨	0	1	1		诸暨	0	1	1	上海市青浦区白鹤镇（赵屯桥草莓）
上海	青浦		练塘镇	茭白		缙云	0	1	1		缙云	0	1	1	上海市青浦区练塘镇（茭白）
上海	奉贤		青村镇解放村	黄桃		仙居	0	2	2		仙居	0	2	2	上海市奉贤区青村镇解放村（黄桃）
上海	奉贤		庄行镇存古村	奉叶蜜梨		永嘉	0	0	0		永嘉	0	0	0	上海市奉贤区庄行镇存古村（奉叶蜜梨）
上海	奉贤		庄行镇潘垫村	奉叶蜜梨		天台	0	2	2		天台	0	2	2	上海市奉贤区庄行镇潘垫村（奉叶蜜梨）
上海	崇明		新河镇新建村	中华绒螯蟹		临海	0	3	3		临海	0	3	3	上海市崇明区新河镇新建村（中华绒螯蟹）
上海	崇明		中兴镇	花菜		海曙	0	2	2		海曙	0	2	2	上海市崇明区中兴镇（花菜）
上海	崇明		绿华镇	飞岛柑橘		镇海	0	0	0		镇海	0	0	0	上海市崇明区绿华镇（飞岛柑橘）
江苏	南京	浦口	盘城街道落桥社区	滁河湾葡萄		海盐	0	0	0		海盐	0	0	0	江苏省南京市浦口区盘城街道落桥社区（滁河湾葡萄）
江苏	南京	浦口	汤泉街道	“汤泉”牌苗木		泰兴	0	2	2		泰兴	0	2	2	江苏省南京市浦口区汤泉街道（“汤泉”牌苗木）
江苏	南京	栖霞	八卦洲街道	八卦洲芦蒿		东海	0	2	2		东海	0	2	2	江苏省南京市栖霞区八卦洲街道（八卦洲芦蒿）
江苏	南京	江宁	横溪街道新杨社区居民委员会	绿王大自然西瓜		睢宁	0	0	0		睢宁	0	0	0	江苏省南京市江宁区横溪街道新杨社区居民委员会（绿王大自然西瓜）
江苏	南京	六合	马集镇大圣村	大圣水芹		沭阳	0	3	3		沭阳	0	3	3	江苏省南京市六合区马集镇大圣村（大圣水芹）
江苏	南京	溧水	白马镇石头寨村	金瑞蓝莓		丹阳	0	1	1		丹阳	0	1	1	江苏省南京市溧水区白马镇石头寨村（金瑞蓝莓）
江苏	南京	高淳	东坝镇红松村	葡萄		桐庐	0	2	2		桐庐	0	2	2	江苏省南京市高淳县东坝镇红松村（葡萄）
江苏	无锡	惠山	阳山镇	水蜜桃		建德	0	0	0		建德	0	0	0	江苏省无锡市惠山区阳山镇（水蜜桃）
江苏	无锡	滨湖	马山街道	马山杨梅		南浔	0	1	1		南浔	0	1	1	江苏省无锡市滨湖区马山街道（马山杨梅）
江苏	无锡	宜兴	湖㳇镇张阳村	张阳花卉		椒江	0	0	0		椒江	0	0	0	江苏省无锡市宜兴市湖㳇镇张阳村（张阳花卉）
江苏	无锡	宜兴	张渚镇省庄村	红岭茶叶		新沂	0	1	1		新沂	0	1	1	江苏省无锡市宜兴市张渚镇省庄村（红岭茶叶）
江苏	无锡	宜兴	周铁镇洋溪村	洋溪萝卜		泗阳	0	1	1		泗阳	0	1	1	江苏省无锡市宜兴市周铁镇洋溪村（洋溪萝卜）
江苏	无锡	江阴	顾山镇红豆村	金顾山水蜜桃		北仑	0	0	0		北仑	0	0	0	江苏省无锡市江阴市顾山镇红豆村（金顾山水蜜桃）
江苏	无锡	江阴	月城镇双泾村	双泾葡萄		嵊州	0	0	0		嵊州	0	0	0	江苏省无锡市江阴市月城镇双泾村（双泾葡萄）
江苏	无锡	江阴	璜土镇	璜土葡萄		柯城	0	2	2		柯城	0	2	2	江苏省无锡市江阴市璜土镇（璜土葡萄）
江苏	徐州	云龙	大龙湖办事处段山村	断山观赏鱼		天长	1	0	1		天长	1	0	1	江苏省徐州市云龙区大龙湖办事处段山村（断山观赏鱼）
江苏	徐州	贾汪	茱萸山街道	休闲农业		富阳	0	1	1		富阳	0	1	1	江苏省徐州市贾汪区茱萸山街道（休闲农业）
江苏	徐州	贾汪	紫庄镇	紫庄蔬菜		黄岩	0	0	0		黄岩	0	0	0	江苏省徐州市贾汪区紫庄镇（紫庄蔬菜）
江苏	徐州	铜山	三堡镇徐村	康华食用菌		临安	0	0	0		临安	0	0	0	江苏省徐州市铜山区三堡镇徐村（康华食用菌）
江苏	徐州	新沂	瓦窑镇街集村	新元有机芹菜		泾	1	0	1		泾	1	0	1	江苏省徐州市新沂市瓦窑镇街集村（新元有机芹菜）
江苏	徐州	邳州	港上镇前湖村	草莓		铜山	0	1	1		铜山	0	1	1	江苏省徐州市邳州市港上镇前湖村（草莓）
江苏	徐州	邳州	铁富镇	邳州银杏		玉环	0	2	2		玉环	0	2	2	江苏省徐州市邳州市铁富镇（邳州银杏）
江苏	徐州	沛	朱寨镇	生态肉鸭		句容	0	4	4		句容	0	4	4	江苏省徐州市沛县朱寨镇（生态肉鸭）
江苏	徐州	丰	大沙河镇	大沙河白酥梨		通州	0	2	2		通州	0	2	2	江苏省徐州市丰县大沙河镇（大沙河白酥梨）
江苏	常州	武进	礼嘉镇秦巷村	科丰葡萄		宁海	0	0	0		宁海	0	0	0	江苏省常州市武进区礼嘉镇秦巷村（科丰葡萄）
江苏	常州	武进	洛阳镇阳湖村	苏常鲜葡萄		江山	0	1	1		江山	0	1	1	江苏省常州市武进区洛阳镇阳湖村（苏常鲜葡萄）
江苏	常州	天宁	郑陆镇黄天荡村	黄天荡河蟹		兴化	0	3	3		兴化	0	3	3	江苏省常州市天宁区郑陆镇黄天荡村（黄天荡河蟹）
江苏	常州	金坛	金城镇白塔村	塔湖香葱		滨江	0	0	0		滨江	0	0	0	江苏省常州市金坛区金城镇白塔村（塔湖香葱）
江苏	常州	金坛	指前镇清水渎村	苏标河蟹		上虞	0	1	1		上虞	0	1	1	江苏省常州市金坛区指前镇清水渎村（苏标河蟹）
江苏	常州	金坛	尧塘街道	花卉苗木		云和	0	0	0		云和	0	0	0	江苏省常州市金坛区尧塘街道（花卉苗木）
江苏	常州	溧阳	社渚镇东升村	胥河青虾		宿城	0	0	0		宿城	0	0	0	江苏省常州市溧阳市社渚镇东升村（胥河青虾）
江苏	常州	溧阳	天目湖镇	休闲农业		金东	0	0	0		金东	0	0	0	江苏省常州市溧阳市天目湖镇（休闲农业）
江苏	苏州	吴中	东山镇碧螺村	吴侬碧螺春茶		沛	0	1	1		沛	0	1	1	江苏省苏州市吴中区东山镇碧螺村（吴侬碧螺春茶）
江苏	苏州	吴中	金庭镇秉常村	青种枇杷		长兴	0	1	1		长兴	0	1	1	江苏省苏州市吴中区金庭镇秉常村（青种枇杷）
江苏	苏州	相城	阳澄湖生态休闲旅游度假区莲花村	阳澄湖大闸蟹		婺城	0	2	2		婺城	0	2	2	江苏省苏州市相城区阳澄湖生态休闲旅游度假区莲花村（阳澄湖大闸蟹）
江苏	苏州	相城	阳澄湖镇北前村	阳澄湖大闸蟹		丹徒	0	1	1		丹徒	0	1	1	江苏省苏州市相城区阳澄湖镇北前村（阳澄湖大闸蟹）
江苏	苏州	常熟	董浜镇东盾村	曹家桥蔬菜		赣榆	0	1	1		赣榆	0	1	1	江苏省苏州市常熟市董浜镇东盾村（曹家桥蔬菜）
江苏	苏州	常熟	沙家浜镇	阳澄湖大闸蟹		东台	0	1	1		东台	0	1	1	江苏省苏州市常熟市沙家浜镇（阳澄湖大闸蟹）
江苏	南通	通州	二甲镇路中村	威奇太保蔬菜		虎丘	0	0	0		虎丘	0	0	0	江苏省南通市通州区二甲镇路中村（威奇太保蔬菜）
江苏	南通	通州	刘桥镇长岸村	嘉安荷仁豆		玄武	0	0	0		玄武	0	0	0	江苏省南通市通州区刘桥镇长岸村（嘉安荷仁豆）
江苏	南通	海安	大公镇群益村	鑫缘蚕茧		如东	0	2	2		如东	0	2	2	江苏省南通市海安县大公镇群益村（鑫缘蚕茧）
江苏	南通	海安	老坝港滨海新区角斜镇	紫菜		磐安	0	0	0		磐安	0	0	0	江苏省南通市海安县老坝港滨海新区（角斜镇）（紫菜）
江苏	南通	海安	李堡镇光明村	绿浪蔬菜		海州	0	0	0		海州	0	0	0	江苏省南通市海安县李堡镇光明村（绿浪蔬菜）
江苏	南通	启东	东海镇兴垦村	脊尾白虾		灌云	0	1	1		灌云	0	1	1	江苏省南通市启东市东海镇兴垦村（脊尾白虾）
江苏	南通	启东	惠萍镇果园村	“三水一高”梨		三门	0	0	0		三门	0	0	0	江苏省南通市启东市惠萍镇果园村（“三水一高”梨）
江苏	南通	如皋	江安镇联络新社区	肉制品		丰	0	1	1		丰	0	1	1	江苏省南通市如皋市江安镇联络新社区（肉制品）
江苏	南通	如皋	如城街道	花木盆景		启东	0	2	2		启东	0	2	2	江苏省南通市如皋市如城街道（花木盆景）
江苏	南通	海门	常乐镇	常乐草莓、西甜瓜		相山	0	0	0		相山	0	0	0	江苏省南通市海门市常乐镇（常乐草莓、西甜瓜）
江苏	南通	海门	海永镇	乡村休闲		桐城	0	1	1		桐城	0	1	1	江苏省南通市海门市海永镇（乡村休闲）
江苏	南通	海门	四甲镇合兴村	海玉山药		泰顺	0	1	1		泰顺	0	1	1	江苏省南通市海门市四甲镇合兴村（海玉山药）
江苏	南通	如东	南通外向型农业综合开发区何丫村	南美白对虾		上城	0	0	0		上城	0	0	0	江苏省南通市如东县南通外向型农业综合开发区何丫村（南美白对虾）
江苏	南通	如东	马塘镇	精丰生猪		金安	0	0	0		金安	0	0	0	江苏省南通市如东县马塘镇（精丰生猪）
江苏	连云港		云台街道后关村	野仙云雾		浦口	0	2	2		浦口	0	2	2	江苏省连云港市云台街道后关村（野仙云雾）
江苏	连云港	赣榆	厉庄镇谢湖村	谢湖大樱桃		肥西	1	0	1		肥西	1	0	1	江苏省连云港市赣榆区厉庄镇谢湖村（谢湖大樱桃）
江苏	连云港	东海	桃林镇北芹村	北芹口西葫芦		姑苏	0	0	0		姑苏	0	0	0	江苏省连云港市东海县桃林镇北芹村（北芹口西葫芦）
江苏	连云港	东海	黄川镇	草莓		龙泉	0	0	0		龙泉	0	0	0	江苏省连云港市东海县黄川镇（草莓）
江苏	连云港	灌云	南岗乡许相村	万惠芦蒿		贾汪	0	2	2		贾汪	0	2	2	江苏省连云港市灌云县南岗乡许相村（万惠芦蒿）
江苏	连云港	灌南	新安镇	灌南金针菇		六合	0	1	1		六合	0	1	1	江苏省连云港市灌南县新安镇（灌南金针菇）
江苏	淮安	淮安	苏嘴镇	苏嘴西瓜		青阳	1	0	1		青阳	1	0	1	江苏省淮安市淮安区苏嘴镇（苏嘴西瓜）
江苏	淮安	淮阴	丁集镇娘庄村	丁集黄瓜		江都	0	2	2		江都	0	2	2	江苏省淮安市淮阴区丁集镇娘庄村（丁集黄瓜）
江苏	淮安	洪泽	西顺河镇	洪泽湖大闸蟹		仪征	0	2	2		仪征	0	2	2	江苏省淮安市洪泽区西顺河镇（洪泽湖大闸蟹）
江苏	淮安	清浦	黄码乡	淮安红椒		新昌	0	1	1		新昌	0	1	1	江苏省淮安市清浦区黄码乡（淮安红椒）
江苏	淮安	金湖	前锋镇白马湖村	白马湖大闸蟹		衢江	0	0	0		衢江	0	0	0	江苏省淮安市金湖县前锋镇白马湖村（白马湖大闸蟹）
江苏	盐城	盐都	楼王镇	楼王异育银鲫		云龙	0	1	1		云龙	0	1	1	江苏省盐城市盐都区楼王镇（楼王异育银鲫）
江苏	盐城	响水	张集社区韩荡村	天荷源莲藕汁		遂昌	0	0	0		遂昌	0	0	0	江苏省盐城市响水县张集社区韩荡村（天荷源莲藕汁）
江苏	盐城	射阳	洋马镇药材村	菊花		江干	0	0	0		江干	0	0	0	江苏省盐城市射阳县洋马镇药材村（菊花）
江苏	盐城	东台	富安镇	干桑蚕茧		舒城	0	0	0		舒城	0	0	0	江苏省盐城市东台市富安镇（干桑蚕茧）
江苏	盐城	大丰	大中镇恒北村	麋鹿早酥梨		霍山	1	1	2						江苏省盐城市大丰市大中镇恒北村（麋鹿早酥梨）
江苏	扬州	江都	小纪镇吉东村	罗氏沼虾		宣州	0	2	2						江苏省扬州市江都区小纪镇吉东村（罗氏沼虾）
江苏	扬州	江都	丁伙镇	丁伙花木		松阳	0	1	1						江苏省扬州市江都区丁伙镇（丁伙花木）
江苏	扬州	宝应	泾河镇松竹村	果蔬		兰溪	0	0	0						江苏省扬州市宝应区泾河镇松竹村（果蔬）
江苏	扬州	宝应	忘直港镇北河村	宝应核桃乌		砀山	2	0	2						江苏省扬州市宝应区忘直港镇北河村（宝应核桃乌）
江苏	扬州	仪征	真州镇三八村	绿篱蔬菜		象山	0	0	0						江苏省扬州市仪征市真州镇三八村（绿篱蔬菜）
江苏	扬州	仪征	真州镇佐安村	康大葡萄		庆元	0	1	1						江苏省扬州市仪征市真州镇佐安村（康大葡萄）
江苏	扬州	高邮	送桥镇邵庄村	润湖高邮鸭		全椒	1	0	1						江苏省扬州市高邮市送桥镇邵庄村（润湖高邮鸭）
江苏	镇江	丹徒	上党镇敖毅村	尚香黄桃		亭湖	0	0	0						江苏省镇江市丹徒区上党镇敖毅村（尚香黄桃）
江苏	镇江	丹阳	司徒镇屯甸村	金山翠芽		泉山	0	0	0						江苏省镇江市丹阳市司徒镇屯甸村（金山翠芽）
江苏	镇江	句容	天王镇戴庄村	野山小村大米		怀宁	0	0	0						江苏省镇江市句容市天王镇戴庄村（野山小村大米）
江苏	镇江	句容	天王镇唐陵村	华安彩叶花卉苗木		邳州	0	2	2						江苏省镇江市句容市天王镇唐陵村（华安彩叶花卉苗木）
江苏	镇江	句容	后白镇西冯村	西冯草坪		谯城	0	3	3						江苏省镇江市句容市后白镇西冯村（西冯草坪）
江苏	镇江	句容	茅山镇丁庄村	老方葡萄		长丰	1	0	1						江苏省镇江市句容市茅山镇丁庄村（老方葡萄）
江苏	泰州	高港	白马镇岱白村	绿姿苗木		巢湖	0	1	1						江苏省泰州市高港区白马镇岱白村（绿姿苗木）
江苏	泰州	姜堰	桥头镇桥头村	香菇		溧水	0	1	1						江苏省泰州市姜堰区桥头镇桥头村（香菇）
江苏	泰州	姜堰	溱潼镇	溱湖河蟹		阜南	2	0	2						江苏省泰州市姜堰区溱潼镇（溱湖河蟹）
江苏	泰州	姜堰	沈高镇	河横西瓜、葡萄		宿豫	0	0	0						江苏省泰州市姜堰区沈高镇（河横西瓜、葡萄）
江苏	泰州	兴化	陈堡镇蒋庄村	红富堡番茄		连云	0	0	0						江苏省泰州市兴化市陈堡镇蒋庄村（红富堡番茄）
江苏	泰州	兴化	垛田镇	香葱		肥东	1	0	1						江苏省泰州市兴化市垛田镇（香葱）
江苏	泰州	兴化	缸顾乡东旺村	千垛菜花		岳西	4	0	4						江苏省泰州市兴化市缸顾乡东旺村（千垛菜花）
江苏	泰州	泰兴	黄桥镇祁巷村	祁巷蔬菜		滨海	0	0	0						江苏省泰州市泰兴市黄桥镇祁巷村（祁巷蔬菜）
江苏	泰州	泰兴	宣堡镇郭寨村	苗木		庐江	1	0	1						江苏省泰州市泰兴市宣堡镇郭寨村（苗木）
江苏	宿迁	沭阳	庙头镇聚贤村	花卉		镜湖	0	1	1						江苏省宿迁市沭阳县庙头镇聚贤村（花卉）
江苏	宿迁	沭阳	新河镇	沭阳新河花木		下城	0	0	0						江苏省宿迁市沭阳县新河镇（沭阳新河花木）
江苏	宿迁	沭阳	颜集镇	虞姬花卉苗木		博望	0	0	0						江苏省宿迁市沭阳县颜集镇（虞姬花卉苗木）
江苏	宿迁	泗阳	八集乡	八集小花生		当涂	1	0	1						江苏省宿迁市泗阳县八集乡（八集小花生）
江苏	宿迁	泗洪	临淮镇	佳健河蟹		金寨	1	0	1						江苏省宿迁市泗洪县临淮镇（佳健河蟹）
浙江	杭州	萧山	益农镇三围村	蔬菜		宿松	3	0	3						浙江省杭州市萧山区益农镇三围村（蔬菜）
浙江	杭州	余杭	仁和街道花园村	伍莲红花卉苗木		青田	0	0	0						浙江省杭州市余杭区仁和街道花园村（伍莲红花卉苗木）
浙江	杭州	余杭	运河镇双桥村	生态鳖		太湖	0	0	0						浙江省杭州市余杭区运河镇双桥村（生态鳖）
浙江	杭州	余杭	中泰街道紫荆村	中泰竹笛		鸠江	0	0	0						浙江省杭州市余杭区中泰街道紫荆村（中泰竹笛）
浙江	杭州	余杭	径山镇	古钟径山茶		宝应	0	2	2						浙江省杭州市余杭区径山镇（古钟径山茶）
浙江	杭州	富阳	新登镇半山村	鲜桃		界首	0	0	0						浙江省杭州市富阳区新登镇半山村（鲜桃）
浙江	杭州	桐庐	横村镇阳山畈村	阳山畈水蜜桃		颍上	0	0	0						浙江省杭州市桐庐县横村镇阳山畈村（阳山畈水蜜桃）
浙江	杭州	桐庐	钟山乡大市村	桐江钟山蜜梨		宁国	1	0	1						浙江省杭州市桐庐县钟山乡大市村（桐江钟山蜜梨）
浙江	杭州	淳安	千岛湖镇青溪村	景山水蜜桃		奉化	0	5	5						浙江省杭州市淳安县千岛湖镇青溪村（景山水蜜桃）
浙江	温州	乐清	大荆镇平园村	铁皮石斛枫斗		临泉	0	1	1						浙江省温州市乐清市大荆镇平园村（铁皮石斛枫斗）
浙江	温州	乐清	仙溪镇北垟村	铁皮石斛		颍州	0	1	1						浙江省温州市乐清市仙溪镇北垟村（铁皮石斛）
浙江	温州	平阳	水头镇新联村	平阳黄汤茶		高邮	0	1	1						浙江省温州市平阳县水头镇新联村（平阳黄汤茶）
浙江	温州	泰顺	罗阳镇恩岱垟村	恩岱垟猕猴桃		文成	0	0	0						浙江省温州市泰顺县罗阳镇恩岱垟村（恩岱垟猕猴桃）
浙江	嘉兴	桐乡	乌镇镇董家村	董家茭白		海门	0	3	3						浙江省嘉兴市桐乡市乌镇镇董家村（董家茭白）
浙江	嘉兴	嘉善	罗星街道马家桥村	银嘉膳甜瓜		岱山	0	0	0						浙江省嘉兴市嘉善县罗星街道马家桥村（银嘉膳甜瓜）
浙江	嘉兴	嘉善	天凝镇光明村	杨庙雪菜		潜山	1	0	1						浙江省嘉兴市嘉善县天凝镇光明村（杨庙雪菜）
浙江	湖州	南浔	菱湖镇陈邑村	加州鲈鱼		开化	0	1	1						浙江省湖州市南浔区菱湖镇陈邑村（加州鲈鱼）
浙江	湖州	德清	三合乡塘家琪村	水精灵青虾		高淳	0	1	1						浙江省湖州市德清县三合乡塘家琪村（水精灵青虾）
浙江	湖州	长兴	和平镇吴村村	霞幕山白茶		扬中	0	0	0						浙江省湖州市长兴县和平镇吴村村（霞幕山白茶）
浙江	湖州	安吉	灵峰镇剑山村	剑山砂梨		如皋	0	2	2						浙江省湖州市安吉县灵峰镇剑山村（剑山砂梨）
浙江	湖州	安吉	天荒坪镇大溪村	农家乐		太和	1	0	1						浙江省湖州市安吉县天荒坪镇大溪村（农家乐）
浙江	湖州	安吉	溪龙乡	安吉白茶		淳安	0	1	1						浙江省湖州市安吉县溪龙乡（安吉白茶）
浙江	绍兴	上虞	盖北镇	葡萄		景宁畲族自治	0	0	0						浙江省绍兴市上虞区盖北镇（葡萄）
浙江	绍兴	诸暨	同山镇绿剑村	茶叶		常山	0	0	0						浙江省绍兴市诸暨市同山镇绿剑村（茶叶）
浙江	绍兴	新昌	镜岭镇外婆坑村	外婆坑龙井		莲都	0	0	0						浙江省绍兴市新昌县镜岭镇外婆坑村（外婆坑龙井）
浙江	金华	婺城	罗店镇后溪村	山茶花		建湖	0	0	0						浙江省金华市婺城区罗店镇后溪村（山茶花）
浙江	金华	婺城	竹马乡下张家村	竹马乡茶花		繁昌	1	0	1						浙江省金华市婺城区竹马乡下张家村（竹马乡茶花）
浙江	衢州	柯城	七里乡	七里源茄子		阜宁	0	0	0						浙江省衢州市柯城区七里乡（七里源茄子）
浙江	衢州	柯城	石梁镇	衢州椪柑		蒙城	0	0	0						浙江省衢州市柯城区石梁镇（衢州椪柑）
浙江	衢州	江山	坛石镇	江山白银耳鸡		绩溪	0	1	1						浙江省衢州市江山市坛石镇（江山白银耳鸡）
浙江	衢州	开化	村头镇大黄山村	开化龙顶		濉溪	0	0	0						浙江省衢州市开化县村头镇大黄山村（开化龙顶）
浙江	舟山	普陀	朱家尖镇莲花村	渔家乐		海安	0	3	3						浙江省舟山市普陀区朱家尖镇莲花村（渔家乐）
浙江	舟山	嵊泗	枸杞镇	贻贝		南陵	1	0	1						浙江省舟山市嵊泗县枸杞镇（贻贝）
浙江	台州	温岭	滨海镇民益村	大棚葡萄		埇桥	0	3	3						浙江省台州市温岭市滨海镇民益村（大棚葡萄）
浙江	台州	临海	白水洋镇上游村	上清杨梅		盱眙	0	0	0						浙江省台州市临海市白水洋镇上游村（上清杨梅）
浙江	台州	临海	上盘镇劳动村	碧畅西兰花		来安	1	0	1						浙江省台州市临海市上盘镇劳动村（碧畅西兰花）
浙江	台州	临海	涌泉镇梅岘村	梅尖山柑橘		灵璧	0	0	0						浙江省台州市临海市涌泉镇梅岘村（梅尖山柑橘）
浙江	台州	玉环	干江镇甸山头村	甸山盘菜		弋江	0	0	0						浙江省台州市玉环县干江镇甸山头村（甸山盘菜）
浙江	台州	玉环	清港镇樟岙村	文旦		溧阳	0	2	2						浙江省台州市玉环县清港镇樟岙村（文旦）
浙江	台州	天台	三州镇车门湾村	茶叶		普陀	0	1	1						浙江省台州市天台县三州镇车门湾村（茶叶）
浙江	台州	天台	石梁镇	天台山云雾茶		枞阳	0	1	1						浙江省台州市天台县石梁镇（天台山云雾茶）
浙江	台州	仙居	步路乡	仙居杨梅		望江	0	0	0						浙江省台州市仙居县步路乡（仙居杨梅）
浙江	台州	仙居	步路乡西炉村	杨梅		崇川	0	0	0						浙江省台州市仙居县步路乡西炉村（杨梅）
浙江	丽水	缙云	前路镇南弄村	南隆水蜜桃		泗洪	0	1	1						浙江省丽水市缙云县前路镇南弄村（南隆水蜜桃）
浙江	丽水	松阳	新兴乡	越玉兰松阳茶		黟	1	0	1						浙江省丽水市松阳县新兴乡（越玉兰松阳茶）
浙江	丽水	庆元	黄田镇中济村	黄田灰树花		东至	0	0	0						浙江省丽水市庆元县黄田镇中济村（黄田灰树花）
浙江	宁波	海曙	龙观乡李岙村	辣椒		郎溪	0	0	0						浙江省宁波市海曙区龙观乡李岙村（辣椒）
浙江	宁波	海曙	章水镇杖锡村	高湾枇杷		黄山	2	1	3						浙江省宁波市海曙区章水镇杖锡村（高湾枇杷）
浙江	宁波	奉化	尚田镇冷西村	溪口雷笋		龙游	0	0	0						浙江省宁波市奉化区尚田镇冷西村（溪口雷笋）
浙江	宁波	奉化	西坞街道金峨村	锦屏山奉化水蜜桃		贵池	0	2	2						浙江省宁波市奉化区西坞街道金峨村（锦屏山奉化水蜜桃）
浙江	宁波	奉化	溪口镇新建村	第一泉茶叶		迎江	0	0	0						浙江省宁波市奉化区溪口镇新建村（第一泉茶叶）
浙江	宁波	奉化	溪口镇许江岸村	慈溪蜜梨		五河	0	0	0						浙江省宁波市奉化区溪口镇许江岸村（慈溪蜜梨）
浙江	宁波	奉化	萧王庙街道林家村	金峨花木		盐都	0	1	1						浙江省宁波市奉化区萧王庙街道林家村（金峨花木）
安徽	芜湖		陶辛镇马桥村	青虾		淮安	5	1	6						安徽省芜湖县陶辛镇马桥村（青虾）
安徽	宁国		南极乡梅村村	山核桃		宜秀	0	0	0						安徽省宁国市南极乡梅村村（山核桃）
安徽	铜陵		顺安镇凤凰山村	凤丹皮		旌德	1	0	1						安徽省铜陵县顺安镇凤凰山村（凤丹皮）
安徽	池州	贵池	梅村镇霄坑村	霄坑绿茶		裕安	1	0	1						安徽省池州市贵池区梅村镇霄坑村（霄坑绿茶）
安徽	休宁		海阳镇盐铺村	菊花		寿	0	0	0						安徽省休宁县海阳镇盐铺村（菊花）
安徽	合肥	包河	大圩镇新民村	葡萄		琅琊	0	0	0						安徽省合肥市包河区大圩镇新民村（葡萄）
安徽	淮北	杜集	段园镇大庄村	葡萄		广德	5	0	5						安徽省淮北市杜集区段园镇大庄村（葡萄）
安徽	宿州	埇桥	西寺坡镇谷家村	蔬菜		龙子湖	0	0	0						安徽省宿州市埇桥区西寺坡镇谷家村（蔬菜）
安徽	蚌埠	淮上	梅桥乡苗台村	大青豆		颍泉	0	0	0						安徽省蚌埠市淮上区梅桥乡苗台村（大青豆）
安徽	阜南		黄岗镇	柳编		灌南	0	1	1						安徽省阜南县黄岗镇（柳编）
安徽	岳西		主簿镇	岳西茭白		凤台	0	0	0						安徽省岳西县主簿镇（岳西茭白）
安徽	长丰		水湖镇	长丰草莓		歙	1	0	1						安徽省长丰县水湖镇（长丰草莓）
安徽	宿州	埇桥	西二铺乡沟西村	沟西村西瓜		祁门	0	1	1						安徽省宿州市埇桥区西二铺乡沟西村（沟西村西瓜）
安徽	亳州	谯城	十九里镇	芍花中药材		泗	0	0	0						安徽省亳州市谯城区十九里镇（芍花中药材）
安徽	太和		李兴镇	鹏宇桔梗		嵊泗	0	1	1						安徽省太和县李兴镇（鹏宇桔梗）
安徽	蚌埠	禹会	涂山风景	怀远石榴		利辛	0	0	0						安徽省蚌埠市禹会区涂山风景区（怀远石榴）
安徽	滁州	南谯	施集镇杨饭店村	金玉滁菊		明光	0	0	0						安徽省滁州市南谯区施集镇杨饭店村（金玉滁菊）
安徽	无为		泉塘乡中垄村	濡泉螃蟹		淮阴	0	1	1						安徽省无为县泉塘乡中垄村（濡泉螃蟹）
安徽	潜山		塔畈乡倪河村	天柱仙芽		金湖	0	1	1						安徽省潜山县塔畈乡倪河村（天柱仙芽）
安徽	宣城	宣州	五星乡刘福村	福雪芹芽		涡阳	1	0	1						安徽省宣城市宣州区五星乡刘福村（福雪芹芽）
安徽	石台	横渡镇河西村	绿色石桥步经果			凤阳	0	1	1						安徽省石台县横渡镇河西村（绿色石桥步经果）
安徽	黄山	黄山	新明乡猴坑村	太平猴魁		郊	0	1	1						安徽省黄山市黄山区新明乡猴坑村（太平猴魁）
安徽	当涂		乌溪镇七房村	七房蟹苗		定远	0	0	0						安徽省当涂县乌溪镇七房村（七房蟹苗）
安徽	广德		东亭乡高峰村	圣卫工艺折扇		石台	1	0	1						安徽省广德县东亭乡高峰村（圣卫工艺折扇）
安徽	霍山		漫水河镇南庄村	漫水河百合		大观	0	0	0						安徽省霍山县漫水河镇南庄村（漫水河百合）
安徽	肥东		牌坊乡牌坊民族村	千柳杭椒		萧	0	1	1						安徽省肥东县牌坊乡牌坊民族村（千柳杭椒）
安徽	砀山		官庄坝镇岳庄坝村	御乐园砀山梨		霍邱	0	0	0						安徽省砀山县官庄坝镇岳庄坝村（御乐园砀山梨）
安徽	涡阳		义门镇	义门涡阳苔干		金坛	0	3	3						安徽省涡阳县义门镇（义门涡阳苔干）
安徽	阜南		会龙镇	会龙辣椒		固镇	0	0	0						安徽省阜南县会龙镇（会龙辣椒）
安徽	天长		铜城镇龙岗社	天长龙岗芡实		洞头	0	0	0						安徽省天长市铜城镇龙岗社区（天长龙岗芡实）
安徽	裕安		顺河镇王滩村	华园顺河辣椒		杜集	0	1	1						安徽省裕安县顺河镇王滩村（华园顺河辣椒）
安徽	繁昌		荻港镇庆大村	繁园葡萄		义安	0	0	0						安徽省繁昌县荻港镇庆大村（繁园葡萄）
安徽	铜陵		老洲镇光辉村	老洲蔬菜		休宁	1	0	1						安徽省铜陵市老洲镇光辉村（老洲蔬菜）
安徽	和	历阳镇太平村	和	辣椒		大通	0	0	0						安徽省和县历阳镇太平村（和县辣椒）
安徽	岳西		姚河乡梯岭村	岳西翠兰		怀远	1	0	1						安徽省岳西县姚河乡梯岭村（岳西翠兰）
安徽	泾		汀溪乡	汀溪兰香茶		涟水	0	0	0						安徽省泾县汀溪乡（汀溪兰香茶）
安徽	歙		深渡镇	三潭枇杷		谢家集	0	0	0						安徽省歙县深渡镇（三潭枇杷）
安徽	广德		东亭乡沙坝村	正文红薯		射阳	0	1	1						安徽省广德县东亭乡沙坝村（正文红薯）
安徽	肥西		上派镇三岗村	三岗苗木花卉		颍东	0	0	0						安徽省肥西县上派镇三岗村（三岗苗木花卉）
安徽	砀山		良梨镇杨集村	砀山酥梨		和	1	0	1						安徽省砀山县良梨镇杨集村（砀山酥梨）
安徽	亳州	谯城	十河镇大周村	天意蔬菜		徽州	1	0	1						安徽省亳州市谯城区十河镇大周村（天意蔬菜）
安徽	阜阳	颍州	颍西街道办事处	心芽大青茄		南谯	0	1	1						安徽省阜阳市颍州区颍西街道办事处（心芽大青茄）
安徽	全椒		二郎口镇曹埠村	赤镇龙虾		响水	0	1	1						安徽省全椒县二郎口镇曹埠村（赤镇龙虾）
安徽	南陵		何湾镇丫山村	丫山凤丹		烈山	0	0	0						安徽省南陵县何湾镇丫山村（丫山凤丹）
安徽	含山		环峰镇祁门村	皖中花芝麻油		洪泽	0	1	1						安徽省含山县环峰镇祁门村（皖中花芝麻油）
安徽	宣城	宣州	水阳镇吴村村	水阳江幼蟹		姜堰	0	3	3						安徽省宣城市宣州区水阳镇吴村村（水阳江幼蟹）
安徽	青阳		新河镇十里岗村	皖南土鸡		淮上	0	1	1						安徽省青阳县新河镇十里岗村（皖南土鸡）
安徽	岳西		姚河乡	岳西翠兰		湾沚	0	0	0						安徽省岳西县姚河乡（岳西翠兰）
安徽	黟		碧阳镇深冲村	黄山毛峰		含山	1	0	1						安徽省黟县碧阳镇深冲村（黄山毛峰）
安徽	宿松		二郎镇界岭村	郎芽油茶		无为	1	1	2						安徽省宿松县二郎镇界岭村（郎芽油茶）
安徽	广德		新杭镇阳湾村	广绿世界苗木		港闸	0	0	0						安徽省广德县新杭镇阳湾村（广绿世界苗木）
安徽	庐江		白湖镇西城村	柳风荸荠		叶集	0	0	0						安徽省庐江县白湖镇西城村（柳风荸荠）
安徽	宿州	埇桥	西二铺乡沈家村	汤家蔬菜		八公山	0	0	0						安徽省宿州市埇桥区西二铺乡沈家村（汤家蔬菜）
安徽	怀远		白莲坡镇白莲坡村	茨淮黑鱼		潘集	0	0	0						安徽省怀远县白莲坡镇白莲坡村（茨淮黑鱼）
安徽	来安		舜山镇林桥村	林桥苗木		大丰	0	1	1						安徽省来安县舜山镇林桥村（林桥苗木）
安徽	金寨		麻埠镇桂花村	六安瓜片		龙港	0	0	0						安徽省金寨县麻埠镇桂花村（六安瓜片）
安徽	芜湖	镜湖	方村镇旗杆村	旗杆荸荠											安徽省芜湖市镜湖区方村镇旗杆村（旗杆荸荠）
安徽	旌德		庙首镇祥云村	天山鹤茶叶											安徽省旌德县庙首镇祥云村（天山鹤茶叶）
安徽	铜陵	郊	灰河乡东风村	添秀葡萄											安徽省铜陵市郊区灰河乡东风村（添秀葡萄）
安徽	岳西		来榜镇斑竹村	馨梦丝缘蚕茧											安徽省岳西县来榜镇斑竹村（馨梦丝缘蚕茧）
安徽	广德		杨滩镇五合村	鹰台山绿茶											安徽省广德县杨滩镇五合村（鹰台山绿茶）
安徽	宿松		洲头乡金坝村	金坝葡萄											安徽省宿松县洲头乡金坝村（金坝葡萄）
安徽	亳州	谯城	十八里镇	药信中药材											安徽省亳州市谯城区十八里镇（药信中药材）
安徽	徽州		富溪乡	黄山毛峰											安徽省徽州区富溪乡（黄山毛峰）
安徽	合肥	巢湖	中垾镇小联圩村	蔬菜											安徽省合肥市巢湖市中垾镇小联圩村（蔬菜）
安徽	安庆	桐城	龙眠街道凤形村	茶叶											安徽省安庆市桐城市龙眠街道凤形村（茶叶）
安徽	池州	贵池	棠溪镇西山村	西山焦枣											安徽省池州市贵池区棠溪镇西山村（西山焦枣）
安徽	宣城	绩溪	上庄镇余川村	茶叶											安徽省宣城市绩溪县上庄镇余川村（茶叶）
安徽	黄山	祁门	平里镇贵溪村	祁门红茶											安徽省黄山市祁门县平里镇贵溪村（祁门红茶）
安徽	阜阳	临泉	杨小街镇王新村	蔬菜											安徽省阜阳市临泉县杨小街镇王新村（蔬菜）
安徽	宿州	萧	酒店镇西赵楼村	西瓜											安徽省宿州市萧县酒店镇西赵楼村（西瓜）
安徽	铜陵	枞阳	麒麟镇新安村	苗木											安徽省铜陵市枞阳县麒麟镇新安村（苗木）
安徽	滁州	凤阳	小溪河镇小岗村	休闲农业											安徽省滁州市凤阳县小溪河镇小岗村（休闲农业）
安徽	广德		四合乡太平村	茶叶											安徽省广德县四合乡太平村（茶叶）
安徽	宿松		柳坪乡邱山村	茶叶											安徽省宿松县柳坪乡邱山村（茶叶）
安徽	六安	霍山	太平畈乡	霍山石斛											安徽省六安市霍山县太平畈乡（霍山石斛）
安徽	芜湖	无为	泉塘镇	螃蟹											安徽省芜湖市无为县泉塘镇（螃蟹）

## Sheet: 七
第七批全国一村一品示范村镇名单	市	县、区					19中国历史文化名镇名单	19中国历史文化名镇名单		第七批全国一村一品示范村镇名单
江苏	宜兴		万石镇后洪村	陶都水芹菜		德清	0	0	0	江苏省宜兴市万石镇后洪村（陶都水芹菜）
江苏		沛	张寨镇陈油坊村	陈由方葡萄		安吉	0	0	0	江苏省沛县张寨镇陈油坊村（陈由方葡萄）
江苏		金坛	朱林镇黄金村	有机稻米		桐乡	1	0	1	江苏省金坛区朱林镇黄金村（有机稻米）
江苏	常熟		董浜镇里睦村	蔬菜		余姚	0	0	0	江苏省常熟市董浜镇里睦村（蔬菜）
江苏	启东		王鲍镇庙桥村	庙桥山药		武义	0	0	0	江苏省启东市王鲍镇庙桥村（庙桥山药）
江苏		海安	南莫镇邓庄村	食用菌		萧山	0	0	0	江苏省海安县南莫镇邓庄村（食用菌）
江苏	连云港	赣榆	黑林镇河西村	蓝莓		慈溪	1	0	1	江苏省连云港市赣榆区黑林镇河西村（蓝莓）
江苏	盐城	大丰	大中镇海防村	裕华大蒜		苍南	0	0	0	江苏省盐城市大丰区大中镇海防村（裕华大蒜）
江苏	南京	溧水	晶桥镇水晶村	晶湖螃蟹		嘉善	0	0	0	江苏省南京市溧水区晶桥镇水晶村（晶湖螃蟹）
江苏	句容		茅山镇丁家边村	桑葚		东阳	0	0	0	江苏省句容市茅山镇丁家边村（桑葚）
江苏	徐州	贾汪	耿集街道办事处	草莓		平阳	0	0	0	江苏省徐州市贾汪区耿集街道办事处（草莓）
江苏	溧阳		社渚镇	溧阳青虾		浦江	0	0	0	江苏省溧阳市社渚镇（溧阳青虾）
江苏		东海	石梁河镇	石梁河葡萄		温岭	0	0	0	江苏省东海县石梁河镇（石梁河葡萄）
江苏	兴化		安丰镇	兴化大闸蟹		诸暨	0	0	0	江苏省兴化市安丰镇（兴化大闸蟹）
江苏	南京	高淳	阳江镇	固城湖螃蟹		缙云	0	0	0	江苏省南京市高淳区阳江镇（固城湖螃蟹）
江苏		广陵	头桥镇红平村	有机稻米		仙居	0	0	0	江苏省广陵区头桥镇红平村（有机稻米）
江苏		沭阳	庙头镇	花卉苗木		永嘉	0	0	0	江苏省沭阳县庙头镇（花卉苗木）
浙江	湖州	吴兴	东林镇泉庆村	泉佳潭鲈鱼		天台	0	0	0	浙江省湖州市吴兴区东林镇泉庆村（泉佳潭鲈鱼）
浙江	桐乡		石门镇殷家漾村	殷家漾蜜梨		临海	0	0	0	浙江省桐乡市石门镇殷家漾村（殷家漾蜜梨）
浙江	兰溪		女埠街道穆坞村	穆坞枇杷		海曙	0	0	0	浙江省兰溪市女埠街道穆坞村（穆坞枇杷）
浙江	慈溪		横河镇	慈溪杨梅		镇海	0	0	0	浙江省慈溪市横河镇（慈溪杨梅）
浙江		宁海	桑洲镇	望海茶茶叶		海盐	0	0	0	浙江省宁海县桑洲镇（望海茶茶叶）
浙江		磐安	新渥镇	磐五味中药材		泰兴	0	0	0	浙江省磐安县新渥镇（磐五味中药材）
浙江		三门	蛇蟠乡	三门青蟹		东海	0	1	1	浙江省三门县蛇蟠乡（三门青蟹）
安徽		庐江	同大镇永安村	同大圩葡萄		睢宁	0	0	0	安徽省庐江县同大镇永安村（同大圩葡萄）
安徽		太湖	北中镇望天村	天华谷尖绿茶		沭阳	0	1	1	安徽省太湖县北中镇望天村（天华谷尖绿茶）
安徽		来安	半塔镇罗庄村	罗庄葡萄		丹阳	0	0	0	安徽省来安县半塔镇罗庄村(罗庄葡萄)
安徽		郎溪	姚村乡妙泉村	瑞草魁茶叶		桐庐	0	0	0	安徽省郎溪县姚村乡妙泉村(瑞草魁茶叶)
安徽		东至	花园乡源口村	绿茶		建德	0	0	0	安徽省东至县花园乡源口村(绿茶)
安徽		枞阳	官埠桥镇官山村	仙羽舌白茶		南浔	0	0	0	安徽省枞阳县官埠桥镇官山村(仙羽舌白茶)
安徽		临泉	高塘镇贾王村	辣椒		椒江	0	0	0	安徽省临泉县高塘镇贾王村(辣椒)
安徽		无为	无城镇董桥村	羽毛加工		新沂	0	0	0	安徽省无为县无城镇董桥村(羽毛加工)
安徽		广德	卢村镇笄山村	休闲农业		泗阳	0	0	0	安徽省广德县卢村镇笄山村(休闲农业)
安徽	黄山	屯溪	奕棋镇徐村	设施蔬菜		北仑	0	0	0	安徽省黄山市屯溪区奕棋镇徐村(设施蔬菜)
安徽		蒙城	乐土镇双龙社区	谷婆婆西葫芦		嵊州	0	0	0	安徽省蒙城县乐土镇双龙社区(谷婆婆西葫芦)
安徽		霍山	大化坪镇	霍山黄芽		柯城	0	0	0	安徽省霍山县大化坪镇(霍山黄芽)
						天长	0	0	0
						富阳	0	0	0
						黄岩	0	0	0
						临安	0	0	0
						泾	0	0	0
						铜山	0	0	0
						玉环	0	0	0
						句容	1	0	1
						通州	0	0	0
						宁海	0	1	1
						江山	0	0	0
						兴化	1	0	1
						滨江	0	0	0
						上虞	0	0	0
						云和	0	0	0
						宿城	0	0	0
						金东	0	0	0
						沛	0	1	1
						长兴	0	0	0
						婺城	0	0	0
						丹徒	0	0	0
						赣榆	0	1	1
						东台	0	0	0
						虎丘	0	0	0
						玄武	0	0	0
						如东	0	0	0
						磐安	0	1	1
						海州	0	0	0
						灌云	0	0	0
						三门	0	1	1
						丰	0	0	0
						启东	1	0	1
						相山	0	0	0
						桐城	0	0	0
						泰顺	0	0	0
						上城	0	0	0
						金安	0	0	0
						浦口	0	0	0
						肥西	0	0	0
						姑苏	0	0	0
						龙泉	0	0	0
						贾汪	0	1	1
						六合	0	0	0
						青阳	0	0	0
						江都	0	0	0
						仪征	0	0	0
						新昌	0	0	0
						衢江	0	0	0
						云龙	0	0	0
						遂昌	0	0	0
						江干	0	0	0
						舒城	0	0	0
						霍山	0	1	1
						宣州	0	0	0
						松阳	0	0	0
						兰溪	1	0	1
						砀山	0	0	0
						象山	0	0	0
						庆元	0	0	0
						全椒	0	0	0
						亭湖	0	0	0
						泉山	0	0	0
						怀宁	0	0	0
						邳州	0	0	0
						谯城	0	0	0
						长丰	0	0	0
						巢湖	0	0	0
						溧水	0	1	1
						阜南	0	0	0
						宿豫	0	0	0
						连云	0	0	0
						肥东	0	0	0
						岳西	0	0	0
						滨海	0	0	0
						庐江	0	1	1
						镜湖	0	0	0
						下城	0	0	0
						博望	0	0	0
						当涂	0	0	0
						金寨	0	0	0
						宿松	0	0	0
						青田	0	0	0
						太湖	0	1	1
						鸠江	0	0	0
						宝应	0	0	0
						界首	0	0	0
						颍上	0	0	0
						宁国	0	0	0
						奉化	0	0	0
						临泉	0	1	1
						颍州	0	0	0
						高邮	0	0	0
						文成	0	0	0
						海门	0	0	0
						岱山	0	0	0
						潜山	0	0	0
						开化	0	0	0
						高淳	0	1	1
						扬中	0	0	0
						如皋	0	0	0
						太和	0	0	0
						淳安	0	0	0
						景宁畲族自治	0	0	0
						常山	0	0	0
						莲都	0	0	0
						建湖	0	0	0
						繁昌	0	0	0
						阜宁	0	0	0
						蒙城	0	1	1
						绩溪	0	0	0
						濉溪	0	0	0
						海安	0	1	1
						南陵	0	0	0
						埇桥	0	0	0
						盱眙	0	0	0
						来安	0	1	1
						灵璧	0	0	0
						弋江	0	0	0
						溧阳	1	0	1
						普陀	0	0	0
						枞阳	0	1	1
						望江	0	0	0
						崇川	0	0	0
						泗洪	0	0	0
						黟	0	0	0
						东至	0	1	1
						郎溪	0	1	1
						黄山	1	0	1
						龙游	0	0	0
						贵池	0	0	0
						迎江	0	0	0
						五河	0	0	0
						盐都	0	0	0
						淮安	0	0	0
						宜秀	0	0	0
						旌德	0	0	0
						裕安	0	0	0
						寿	0	0	0
						琅琊	0	0	0
						广德	0	1	1
						龙子湖	0	0	0
						颍泉	0	0	0
						灌南	0	0	0
						凤台	0	0	0
						歙	0	0	0
						祁门	0	0	0
						泗	0	0	0
						嵊泗	0	0	0
						利辛	0	0	0
						明光	0	0	0
						淮阴	0	0	0
						金湖	0	0	0
						涡阳	0	0	0
						凤阳	0	0	0
						郊	0	0	0
						定远	0	0	0
						石台	0	0	0
						大观	0	0	0
						萧	0	0	0
						霍邱	0	0	0
						金坛	0	1	1
						固镇	0	0	0
						洞头	0	0	0
						杜集	0	0	0
						义安	0	0	0
						休宁	0	0	0
						大通	0	0	0
						怀远	0	0	0
						涟水	0	0	0
						谢家集	0	0	0
						射阳	0	0	0
						颍东	0	0	0
						和	0	0	0
						徽州	0	0	0
						南谯	0	0	0
						响水	0	0	0
						烈山	0	0	0
						洪泽	0	0	0
						姜堰	0	0	0
						淮上	0	0	0
						湾沚	0	0	0
						含山	0	0	0
						无为	0	1	1
						港闸	0	0	0
						叶集	0	0	0
						八公山	0	0	0
						潘集	0	0	0
						大丰	0	1	1
						龙港	0	0	0

[truncated: 15 more sheets: 八, 九, 十, 十一, 十二, 006, 06, 07, 08, 09, 010, 011, 012, 合并, Sheet10]
